# Supplementary material for: Histone Deacetylase 3 Associates With Key Regulators of NFκB Signaling in Lung Epithelial Cells Under Stimulation With LPS.
Source: Research Square preprint supplement (doi:10.21203/rs.3.rs-674720/v1), 2021-07-07
Supplement: Supplementary file 1 [file 408dda9ab9346f6498293d6a.xlsx]

## Sheet: Table 1 Sample Info
Project	5508					Samples	12
Client	Stanfield
Samples	Proteomics ID	starting SDS	uL of Sample	casein spike volume	uL of 20% SDS, 50mM TEAB	uL of 200 mM DTT	uL of 400 mM IAA	uL 12% phosphoric acid for final 1.2%	S-trap binding buffer, 90% MeOH, 100mM TEAB pH 7.1	Volume	4x Wash, Binding buffer	20ng/uL trypsin in 50mM TEAB	Elute 50mM TEAB	Elute, 0.2% formic acid	Elute, 50% ACN, 0.2% formic acid	Final Recon uL of 1% TFA 2% ACN	Injection Volume	total fmol/casein
HDAC3-BioID2 NA 1	52646	2	90	5	-9	4.52632	4.76454	9.52909	733.74	838.56	150	25	40	40	35	20	5	120
HDAC3-BioID2 NA 2	52647	2	90	5	-9	4.52632	4.76454	9.52909	733.74	838.56	150	25	40	40	35	20	5	240
HDAC3-BioID2 NA 3	52648	2	90	5	-9	4.52632	4.76454	9.52909	733.74	838.56	150	25	40	40	35	20	5	120
HDAC3-BioID2 LPS 1	52649	2	90	5	-9	4.52632	4.76454	9.52909	733.74	838.56	150	25	40	40	35	20	5	240
HDAC3-BioID2 LPS 2	52650	2	90	5	-9	4.52632	4.76454	9.52909	733.74	838.56	150	25	40	40	35	20	5	120
HDAC3-BioID2 LPS 3	52651	2	90	5	-9	4.52632	4.76454	9.52909	733.74	838.56	150	25	40	40	35	20	2	240
HDAC3-BioID2 LPS + MS275 1	52652	2	90	5	-9	4.52632	4.76454	9.52909	733.74	838.56	150	25	40	40	35	20	5	120
HDAC3-BioID2 LPS + MS275 2	52653	2	90	5	-9	4.52632	4.76454	9.52909	733.74	838.56	150	25	40	40	35	20	5	240
HDAC3-BioID2 LPS + MS275 3	52654	2	90	5	-9	4.52632	4.76454	9.52909	733.74	838.56	150	25	40	40	35	20	2	120
BioID2 treatment avg Ctrl 1	52655	2	90	5	-9	4.52632	4.76454	9.52909	733.74	838.56	150	25	40	40	35	20	5	240
BioID2 treatment avg Ctrl 2	52656	2	90	5	-9	4.52632	4.76454	9.52909	733.74	838.56	150	25	40	40	35	20	5	120
BioID2 treatment avg Ctrl 3	52657	2	90	5	-9	4.52632	4.76454	9.52909	733.74	838.56	150	25	40	40	35	20	5	240
QC Pool	52658
											Spin 4000g	1hr, 47C	Spin 4000g	Spin 4000g	Spin 4000g
