# Supplementary material for: Histone Deacetylase 3 Associates With Key Regulators of NFκB Signaling in Lung Epithelial Cells Under Stimulation With LPS.
Source: Research Square preprint supplement (doi:10.21203/rs.3.rs-674720/v1), 2021-07-07
Supplement: Supplementary file 2 [file b391fae2eb8fbbf684d9ee90.xlsx]

## Sheet: HDAC3_NA canonical pathways
Â© 2000-2020 QIAGEN. All rights reserved.
Ingenuity Canonical Pathways	-log(p-value)	Ratio	z-score	Molecules
14-3-3-mediated Signaling	2.27	0.0866	NaN	PDIA3,TUBA1A,TUBA1C,TUBA4A,TUBB,TUBB2A,TUBB3,TUBB4A,TUBB4B,TUBB6,YWHAE
2-ketoglutarate Dehydrogenase Complex	1.94	0.4	NaN	DLD,DLST
2-oxobutanoate Degradation I	1.94	0.4	NaN	DLD,PCCA
3-phosphoinositide Biosynthesis	0	0.0242	2	ATP1A1,NUDT5,PTPN12,PTPN13
3-phosphoinositide Degradation	0	0.0258	2	ATP1A1,NUDT5,PTPN12,PTPN13
4-1BB Signaling in T Lymphocytes	0	0.0312	NaN	RELA
5-aminoimidazole Ribonucleotide Biosynthesis I	2.44	0.667	NaN	GART,PFAS
Acetyl-CoA Biosynthesis I (Pyruvate Dehydrogenase Complex)	0.654	0.143	NaN	DLD
Actin Cytoskeleton Signaling	3.12	0.0826	3.638	ACTA1,ACTB,ACTR2,ACTR3,APC,ARPC1B,ARPC4,CDC42,FGF2,FN1,GNA12,GSN,ITGA3,MYL6,PFN1,PFN2,RAC1,RHOA
Actin Nucleation by ARP-WASP Complex	5.12	0.167	3.464	ACTR2,ACTR3,ARPC1B,ARPC4,CDC42,GNA12,ITGA3,RAC1,RHOA,RHOC,RHOG,RHOT2
Activation of IRF by Cytosolic Pattern Recognition Receptors	1.15	0.0794	1.342	IFIT2,IRF7,ISG15,PPIB,RELA
Acute Myeloid Leukemia Signaling	1.02	0.0674	1	ARAF,IDH1,JUP,MTOR,PML,RELA
Acute Phase Response Signaling	1.28	0.0615	2.333	AHSG,ALB,FGB,FN1,FTL,HP,IL18,MTOR,RELA,SERPINE1,SERPINF2
Acyl-CoA Hydrolysis	0.428	0.0769	NaN	ACOT7
Adenine and Adenosine Salvage I	2.91	1	NaN	APRT,PNP
Adenine and Adenosine Salvage III	1.77	0.333	NaN	HPRT1,PNP
Adenosine Nucleotides Degradation II	1.02	0.133	NaN	NT5C3A,PNP
Adipogenesis pathway	0.29	0.0373	NaN	FGF2,HAT1,HDAC2,HDAC3,KDM1A
Adrenomedullin signaling pathway	0	0.0203	2	ARAF,IL18,PDIA3,RELA
Agranulocyte Adhesion and Diapedesis	0	0.0311	NaN	ACTA1,ACTB,FN1,IL18,ITGA3,MYL6
Agrin Interactions at Neuromuscular Junction	1.22	0.0759	2.449	ACTA1,ACTB,CDC42,DVL1,ITGA3,RAC1
Aldosterone Signaling in Epithelial Cells	1.98	0.0759	NaN	AHCY,DNAJA1,DNAJB6,DNAJC7,HSP90B1,HSPA1A/HSPA1B,HSPA2,HSPA8,HSPA9,HSPB1,HSPD1,PDIA3
Allograft Rejection Signaling	0	0.0233	NaN	HLA-A,HLA-B
Altered T Cell and B Cell Signaling in Rheumatoid Arthritis	0.406	0.0444	NaN	HLA-A,HLA-B,IL18,RELA
AMPK Signaling	1.11	0.0561	-0.333	ACACA,ACACB,ACTB,AK9,ELAVL1,MTOR,PPM1G,PPP2R1A,RAB1A,RAB7A,SLC2A1,SMARCE1
Amyloid Processing	0.588	0.06	NaN	CAPN1,CAPN2,CAPNS1
Amyotrophic Lateral Sclerosis Signaling	1.67	0.0825	1.414	CAPN1,CAPN2,CAPNS1,CAT,CYCS,RAB5C,RAC1,SSR4
Androgen Biosynthesis	0.36	0.0625	NaN	AKR1C3
Androgen Signaling	0	0.0294	NaN	GNA12,GNB4,NCOA2,RELA
Angiopoietin Signaling	0	0.0133	NaN	RELA
Antigen Presentation Pathway	2.64	0.154	NaN	HLA-A,HLA-B,PDIA3,PSMB5,TAP1,TAP2
Antioxidant Action of Vitamin C	0.726	0.055	NaN	GLRX,GSTO1,PDIA3,RELA,SLC23A2,SLC2A1
Antiproliferative Role of Somatostatin Receptor 2	0	0.013	NaN	GNB4
Antiproliferative Role of TOB in T Cell Signaling	0.396	0.0513	NaN	PABPC1,PABPC4
Apelin Adipocyte Signaling Pathway	0.788	0.061	2.236	CAT,GSTP1,MGST1,MGST2,MGST3
Apelin Cardiac Fibroblast Signaling Pathway	0.25	0.0435	NaN	SERPINE1
Apelin Cardiomyocyte Signaling Pathway	0.567	0.0505	2.236	ATP2A2,ATP2A3,CAT,MYL6,PDIA3
Apelin Endothelial Signaling Pathway	0	0.0261	NaN	MEF2D,MTOR,RELA
Apelin Pancreas Signaling Pathway	0	0.0227	NaN	RELA
Apoptosis Signaling	1.22	0.0707	1.134	CAPN1,CAPN2,CAPNS1,CDK1,CYCS,DFFA,RELA
April Mediated Signaling	0	0.0256	NaN	RELA
Arginine Biosynthesis IV	0.712	0.167	NaN	GLUD1
Arginine Degradation I (Arginase Pathway)	0.873	0.25	NaN	ARG1
Arginine Degradation VI (Arginase 2 Pathway)	0.712	0.167	NaN	ARG1
Arsenate Detoxification I (Glutaredoxin)	2.15	0.5	NaN	GSTO1,PNP
Aryl Hydrocarbon Receptor Signaling	8.93	0.161	1.134	ALDH18A1,ALDH1A1,ALDH1A3,ALDH1B1,ALDH1L1,ALDH2,ALDH3A1,ALDH3A2,ALDH3B1,GSTO1,GSTP1,HSP90B1,HSPB1,MGST1,MGST2,MGST3,NCOA2,NCOR2,NEDD8,NQO1,RELA,TGM2,TRIP11
Ascorbate Recycling (Cytosolic)	2.15	0.5	NaN	GLRX,GSTO1
Aspartate Biosynthesis	0.991	0.333	NaN	GOT2
Aspartate Degradation II	0.654	0.143	NaN	GOT2
Assembly of RNA Polymerase II Complex	0	0.02	NaN	TAF15
Atherosclerosis Signaling	0.801	0.0556	NaN	ALB,ALOX12B,ALOXE3,APOD,IL18,RELA,S100A8
ATM Signaling	0	0.0309	NaN	BRCA1,CDK1,PPP2R1A
Autoimmune Thyroid Disease Signaling	0.284	0.0408	NaN	HLA-A,HLA-B
Autophagy	0	0.0328	NaN	MTOR,SQSTM1
Axonal Guidance Signaling	1.87	0.0558	NaN	ACTR2,ACTR3,ARPC1B,ARPC4,CDC42,EPHA2,EPHB1,GNA12,GNB4,ITGA3,ITSN1,MYL6,PDIA3,PFN1,PFN2,PPP3CB,RAC1,RHOA,TUBA1A,TUBA1C,TUBA4A,TUBB,TUBB2A,TUBB3,TUBB4A,TUBB4B,TUBB6
B Cell Activating Factor Signaling	0	0.0244	NaN	RELA
B Cell Development	0.439	0.0556	NaN	HLA-A,HLA-B
B Cell Receptor Signaling	0	0.027	2.236	CDC42,MTOR,PPP3CB,RAC1,RELA
BAG2 Signaling Pathway	3.15	0.163	0.378	HSPA1A/HSPA1B,HSPA2,HSPA8,HSPA9,PSME2,PSME4,RELA
Basal Cell Carcinoma Signaling	0.604	0.0556	2	APC,DVL1,DVL2,DVL3
BER pathway	1.19	0.167	NaN	APEX1,FEN1
BEX2 Signaling Pathway	0.275	0.038	NaN	MTOR,PPP2R1A,RELA
Bile Acid Biosynthesis, Neutral Pathway	1.13	0.154	NaN	AKR1C1/AKR1C2,AKR1C3
Biotin-carboxyl Carrier Protein Assembly	2.44	0.667	NaN	ACACA,ACACB
Bladder Cancer Signaling	0	0.0103	NaN	FGF2
BMP signaling pathway	0	0.0118	NaN	RELA
Branched-chain Î±-keto acid Dehydrogenase Complex	0.873	0.25	NaN	DLD
Breast Cancer Regulation by Stathmin1	0	0.0288	NaN	ANKHD1/ANKHD1-EIF4EBP3,CDK1,FGF2,GNB4,MTOR,PPP2R1A,RAC1,RHOA,TUBA1A,TUBA1C,TUBA4A,TUBB,TUBB2A,TUBB3,TUBB4A,TUBB4B,TUBB6
Calcium Signaling	0.517	0.0437	2	ACTA1,ASPH,ATP2A2,ATP2A3,HDAC2,HDAC3,MEF2D,MYL6,PPP3CB
Calcium Transport I	2.36	0.3	NaN	ANXA5,ATP2A2,ATP2A3
Calcium-induced T Lymphocyte Apoptosis	2.66	0.121	2.646	ATP2A2,ATP2A3,CAPN2,HDAC2,HLA-A,HLA-B,MEF2D,PPP3CB
cAMP-mediated signaling	0	0.00877	NaN	APEX1,PPP3CB
Cancer Drug Resistance By Drug Efflux	0	0.0172	NaN	ARAF
Cardiac Hypertrophy Signaling	1.34	0.0583	3.162	CDC42,GNA12,GNB4,HSPB1,MEF2D,MTOR,MYL6,PDIA3,PPP3CB,RAC1,RHOA,RHOC,RHOG,RHOT2
Cardiac Hypertrophy Signaling (Enhanced)	0.562	0.0411	3.578	APEX1,ATP2A2,ATP2A3,DVL1,DVL2,DVL3,FGF2,GNA12,HDAC2,HDAC3,HSPB1,IL18,ITGA3,MEF2D,MTOR,PDIA3,PPP3CB,RELA,RHOA,RPS6
Cardiac Î²-adrenergic Signaling	0.253	0.0355	1	APEX1,ATP2A2,ATP2A3,GNB4,PPP2R1A
Caveolar-mediated Endocytosis Signaling	3.63	0.137	NaN	ACTA1,ACTB,ALB,FLOT2,HLA-A,HLA-B,ITGA3,ITGAV,ITSN1,RAB5C
CCR3 Signaling in Eosinophils	0	0.0242	NaN	GNB4,RAC1,RHOA
CCR5 Signaling in Macrophages	0	0.0106	NaN	GNB4
CD27 Signaling in Lymphocytes	0.25	0.0377	NaN	CYCS,RELA
CD28 Signaling in T Helper Cells	2	0.0833	2.828	ACTR2,ACTR3,ARPC1B,ARPC4,CDC42,HLA-A,HLA-B,PPP3CB,RAC1,RELA
CD40 Signaling	0	0.0154	NaN	RELA
Cdc42 Signaling	1.14	0.0599	2.828	ACTR2,ACTR3,APC,ARPC1B,ARPC4,CDC42,HLA-A,HLA-B,ITGA3,MYL6
CDK5 Signaling	0	0.0278	NaN	CAPN1,ITGA3,PPP2R1A
Cell Cycle Control of Chromosomal Replication	1.86	0.107	2.449	CDK1,CDK12,CDK13,MCM4,MCM6,POLA2
Cell Cycle Regulation by BTG Family Proteins	0.424	0.0541	NaN	PPP2R1A,PRMT1
Cell Cycle: G1/S Checkpoint Regulation	0.375	0.0448	NaN	HDAC2,HDAC3,RPL11
Cell Cycle: G2/M DNA Damage Checkpoint Regulation	1.03	0.0816	0	BRCA1,CDK1,PLK1,YWHAE
Cellular Effects of Sildenafil (Viagra)	0.307	0.0382	NaN	ACTA1,ACTB,MYL6,PABPC4,PDIA3
Ceramide Signaling	0	0.0341	NaN	CYCS,PPP2R1A,RELA
Chemokine Signaling	0	0.0125	NaN	RHOA
Cholecystokinin/Gastrin-mediated Signaling	1.6	0.0756	2.646	CDC42,GNA12,IL18,MEF2D,RAC1,RHOA,RHOC,RHOG,RHOT2
Cholesterol Biosynthesis I	0.428	0.0769	NaN	DHCR7
Cholesterol Biosynthesis II (via 24,25-dihydrolanosterol)	0.428	0.0769	NaN	DHCR7
Cholesterol Biosynthesis III (via Desmosterol)	0.428	0.0769	NaN	DHCR7
Chondroitin Sulfate Degradation (Metazoa)	0.36	0.0625	NaN	OGA
Chronic Myeloid Leukemia Signaling	0	0.0291	NaN	HDAC2,HDAC3,RELA
Citrulline Biosynthesis	2.5	0.333	NaN	ALDH18A1,ARG1,GLS
Clathrin-mediated Endocytosis Signaling	7.67	0.13	NaN	AAK1,ACTA1,ACTB,ACTR2,ACTR3,ALB,AP1G2,AP2A1,AP2M1,AP3M1,APOD,ARF6,ARPC1B,ARPC4,CDC42,CLTC,FGF2,HSPA8,MYO6,PPP3CB,RAB5C,RAB7A,RAC1,S100A8,UBB
Cleavage and Polyadenylation of Pre-mRNA	1.19	0.167	NaN	CPSF2,CPSF6
CNTF Signaling	0	0.0175	NaN	MTOR
Coagulation System	0.903	0.0857	NaN	FGB,SERPINE1,SERPINF2
Colanic Acid Building Blocks Biosynthesis	1.07	0.143	NaN	GPI,UGP2
Colorectal Cancer Metastasis Signaling	0.396	0.0395	2.121	APC,CDC42,DVL1,GNB4,RAC1,RELA,RHOA,RHOC,RHOG,RHOT2
Communication between Innate and Adaptive Immune Cells	0	0.0312	NaN	HLA-A,HLA-B,IL18
Corticotropin Releasing Hormone Signaling	0	0.0138	NaN	KRT1,MEF2D
CREB Signaling in Neurons	0	0.0145	NaN	GNA12,GNB4,PDIA3
Crosstalk between Dendritic Cells and Natural Killer Cells	1.42	0.0787	NaN	ACTA1,ACTB,FSCN1,HLA-A,HLA-B,IL18,RELA
CTLA4 Signaling in Cytotoxic T Lymphocytes	1.42	0.0787	NaN	AP1G2,AP2A1,AP2M1,CLTC,HLA-A,HLA-B,PPP2R1A
CXCR4 Signaling	0.863	0.0539	2.449	CDC42,GNA12,GNB4,MYL6,RAC1,RHOA,RHOC,RHOG,RHOT2
Cyclins and Cell Cycle Regulation	0.495	0.0494	NaN	CDK1,HDAC2,HDAC3,PPP2R1A
Cysteine Biosynthesis III (mammalia)	3.83	0.25	2.449	AHCY,AHCYL1,MAT2A,MAT2B,PRMT1,PRMT5
Cytotoxic T Lymphocyte-mediated Apoptosis of Target Cells	1.51	0.118	NaN	CYCS,DFFA,HLA-A,HLA-B
Death Receptor Signaling	1.38	0.0769	1.633	ACTA1,ACTB,CYCS,DFFA,HSPB1,PARP12,RELA
Dendritic Cell Maturation	0	0.0328	2.449	FSCN1,HLA-A,HLA-B,IL18,PDIA3,RELA
Dermatan Sulfate Degradation (Metazoa)	0.34	0.0588	NaN	OGA
D-myo-inositol (1,4,5,6)-Tetrakisphosphate Biosynthesis	0	0.0284	2	ATP1A1,NUDT5,PTPN12,PTPN13
D-myo-inositol (3,4,5,6)-tetrakisphosphate Biosynthesis	0	0.0284	2	ATP1A1,NUDT5,PTPN12,PTPN13
D-myo-inositol-5-phosphate Metabolism	0	0.0256	2	ATP1A1,NUDT5,PTPN12,PTPN13
DNA damage-induced 14-3-3Ïƒ Signaling	0.845	0.105	NaN	BRCA1,CDK1
DNA Double-Strand Break Repair by Homologous Recombination	0.403	0.0714	NaN	BRCA1
DNA Methylation and Transcriptional Repression Signaling	0	0.0286	NaN	HDAC2
Docosahexaenoic Acid (DHA) Signaling	0	0.0263	NaN	CYCS
Dolichyl-diphosphooligosaccharide Biosynthesis	0.52	0.1	NaN	ALG1
Dopamine Degradation	4.18	0.233	2.646	ALDH1A1,ALDH1A3,ALDH1B1,ALDH2,ALDH3A1,ALDH3A2,ALDH3B1
Dopamine Receptor Signaling	0	0.013	NaN	PPP2R1A
Dopamine-DARPP32 Feedback in cAMP Signaling	0	0.0307	NaN	ATP2A2,ATP2A3,PDIA3,PPP2R1A,PPP3CB
dTMP De Novo Biosynthesis	0.785	0.2	NaN	SHMT2
EGF Signaling	0	0.0182	NaN	MTOR
Eicosanoid Signaling	0.384	0.0455	NaN	AKR1C3,ALOX12B,LTA4H
EIF2 Signaling	36.2	0.272	5.112	ACTA1,ACTB,EIF2AK2,EIF2S3,EIF3E,EIF3K,EIF3L,EIF4A1,EIF4A2,FAU,PABPC1,PTBP1,RPL10,RPL10A,RPL11,RPL12,RPL13,RPL13A,RPL14,RPL15,RPL17,RPL18,RPL18A,RPL21,RPL22,RPL23,RPL26,RPL27,RPL27A,RPL28,RPL29,RPL3,RPL34,RPL38,RPL4,RPL6,RPL7,RPL7A,RPLP0,RPS11,RPS12,RPS14,RPS15A,RPS16,RPS18,RPS2,RPS21,RPS23,RPS25,RPS26,RPS27,RPS29,RPS3,RPS4X,RPS5,RPS6,RPS7,RPS8,RPS9,RPSA,WARS1
Endocannabinoid Cancer Inhibition Pathway	0	0.021	NaN	CASP14,MTOR,RHOA
Endocannabinoid Developing Neuron Pathway	0.418	0.0435	2.236	ARAF,BRCA1,MTOR,RAC1,RHOA
Endocannabinoid Neuronal Synapse Pathway	0	0.0156	NaN	PDIA3,PPP3CB
Endoplasmic Reticulum Stress Pathway	0.775	0.0952	NaN	HSP90B1,TAOK3
Endothelin-1 Signaling	0	0.0213	2	ARAF,CASP14,GNA12,PDIA3
eNOS Signaling	0	0.0314	-2	HSP90B1,HSPA1A/HSPA1B,HSPA2,HSPA8,HSPA9
Ephrin A Signaling	1.08	0.0851	NaN	CDC42,EPHA2,RAC1,RHOA
Ephrin B Signaling	2.42	0.111	1.89	CAP1,CDC42,EPHB1,GNA12,GNB4,ITSN1,RAC1,RHOA
Ephrin Receptor Signaling	2.32	0.0778	2.887	ACTR2,ACTR3,ARPC1B,ARPC4,CDC42,EPHA2,EPHB1,GNA12,GNB4,ITGA3,ITSN1,PTPN13,RAC1,RHOA
Epithelial Adherens Junction Signaling	7.7	0.145	NaN	ACTA1,ACTB,ACTR2,ACTR3,APC,ARPC1B,ARPC4,CDC42,JUP,MYL6,RAC1,RHOA,TUBA1A,TUBA1C,TUBA4A,TUBB,TUBB2A,TUBB3,TUBB4A,TUBB4B,TUBB6,YES1
ErbB Signaling	0	0.0213	NaN	CDC42,MTOR
ERK/MAPK Signaling	0	0.0259	1	ARAF,HSPB1,ITGA3,PPP2R1A,RAC1
ERK5 Signaling	0.329	0.0417	NaN	GNA12,MEF2D,YWHAE
Erythropoietin Signaling	0	0.0132	NaN	RELA
Estrogen Biosynthesis	1.25	0.0976	2	AKR1C3,HSD17B10,HSD17B12,HSD17B4
Estrogen Receptor Signaling	0.917	0.0488	1.291	ATP5F1A,CYC1,GNA12,HDAC3,HNRNPD,HSP90B1,MT-ATP6,MTOR,MYL6,NCOA2,NCOR1,NCOR2,PDIA3,RBFOX2,RELA,RHOA
Estrogen-Dependent Breast Cancer Signaling	0.578	0.0541	NaN	HSD17B10,HSD17B12,HSD17B4,RELA
Estrogen-mediated S-phase Entry	0.217	0.0385	NaN	CDK1
Ethanol Degradation II	4.94	0.25	2.828	ADH5,ALDH1A1,ALDH1A3,ALDH1B1,ALDH2,ALDH3A1,ALDH3A2,ALDH3B1
Ethanol Degradation IV	6.15	0.348	2.828	ALDH1A1,ALDH1A3,ALDH1B1,ALDH2,ALDH3A1,ALDH3A2,ALDH3B1,CAT
Eumelanin Biosynthesis	0.785	0.2	NaN	MIF
Extrinsic Prothrombin Activation Pathway	0.36	0.0625	NaN	FGB
Factors Promoting Cardiogenesis in Vertebrates	0	0.0267	1	APC,DVL1,PDIA3,RHOA
FAK Signaling	1.29	0.0737	NaN	ACTA1,ACTB,CAPN1,CAPN2,CAPNS1,ITGA3,RAC1
FAT10 Cancer Signaling Pathway	0	0.0217	NaN	RELA
FAT10 Signaling Pathway	1.62	0.167	NaN	PSME2,PSME4,SQSTM1
Fatty Acid Activation	2.02	0.231	NaN	ACSL3,ACSL4,SLC27A2
Fatty Acid Î±-oxidation	8.02	0.45	3	ALDH1A1,ALDH1A3,ALDH1B1,ALDH2,ALDH3A1,ALDH3A2,ALDH3B1,ALOX12B,ALOXE3
Fatty Acid Î²-oxidation I	4.94	0.25	2.828	ACADM,ACSL3,ACSL4,HADHA,HADHB,HSD17B10,HSD17B4,SLC27A2
Fc Epsilon RI Signaling	0	0.00855	NaN	RAC1
FcÎ³ Receptor-mediated Phagocytosis in Macrophages and Monocytes	2.75	0.106	3.162	ACTA1,ACTB,ACTR2,ACTR3,ARF6,ARPC1B,ARPC4,CDC42,RAC1,YES1
FGF Signaling	0	0.0238	NaN	FGF2,RAC1
FLT3 Signaling in Hematopoietic Progenitor Cells	0	0.0125	NaN	MTOR
fMLP Signaling in Neutrophils	1.66	0.0776	2.828	ACTR2,ACTR3,ARPC1B,ARPC4,CDC42,GNB4,PPP3CB,RAC1,RELA
Folate Polyglutamylation	1.94	0.4	NaN	MTHFD1,SHMT2
Folate Transformations I	1.42	0.222	NaN	MTHFD1,SHMT2
Formaldehyde Oxidation II (Glutathione-dependent)	1.16	0.5	NaN	ADH5
FXR/RXR Activation	0.338	0.0397	NaN	AHSG,ALB,APOD,IL18,SERPINF2
G Beta Gamma Signaling	0	0.0246	NaN	CDC42,GNA12,GNB4
G Protein Signaling Mediated by Tubby	0	0.0323	NaN	GNB4
GABA Receptor Signaling	0.365	0.0421	NaN	AP1G2,AP2A1,AP2M1,UBB
GADD45 Signaling	0.845	0.105	NaN	BRCA1,CDK1
Gap Junction Signaling	1.63	0.0657	NaN	ACTA1,ACTB,PDIA3,PPP3CB,TUBA1A,TUBA1C,TUBA4A,TUBB,TUBB2A,TUBB3,TUBB4A,TUBB4B,TUBB6
GDNF Family Ligand-Receptor Interactions	0	0.0263	NaN	CDC42,RAC1
GDP-glucose Biosynthesis	1.26	0.182	NaN	HK1,HKDC1
GDP-mannose Biosynthesis	0.712	0.167	NaN	GPI
Germ Cell-Sertoli Cell Junction Signaling	5.56	0.117	NaN	ACTA1,ACTB,CDC42,GSN,ITGA3,JUP,RAC1,RHOA,RHOC,RHOG,RHOT2,TUBA1A,TUBA1C,TUBA4A,TUBB,TUBB2A,TUBB3,TUBB4A,TUBB4B,TUBB6
GÎ±12/13 Signaling	0.509	0.0462	2.449	CDC42,GNA12,MEF2D,MYL6,RELA,RHOA
GÎ±i Signaling	0	0.008	NaN	GNB4
GÎ±q Signaling	0.971	0.057	2.449	CDC42,GNB4,PPP3CB,RAC1,RELA,RHOA,RHOC,RHOG,RHOT2
GÎ±s Signaling	0	0.00935	NaN	GNB4
Glioblastoma Multiforme Signaling	0.886	0.0545	2.333	APC,CDC42,MTOR,PDIA3,RAC1,RHOA,RHOC,RHOG,RHOT2
Glioma Invasiveness Signaling	1.81	0.0946	2.236	CDC42,ITGAV,RAC1,RHOA,RHOC,RHOG,RHOT2
Glioma Signaling	0	0.0182	NaN	IDH1,MTOR
Glucocorticoid Receptor Signaling	9	0.11	NaN	ACTB,FKBP4,HSP90B1,HSPA1A/HSPA1B,HSPA2,HSPA8,HSPA9,KRT1,KRT10,KRT13,KRT14,KRT15,KRT16,KRT17,KRT18,KRT19,KRT2,KRT27,KRT38,KRT4,KRT5,KRT6A,KRT6B,KRT71,KRT73,KRT77,KRT8,KRT9,NCOA2,NCOR1,NCOR2,PPP3CB,RAC1,RELA,SERPINE1,SMARCE1,TAF15
Gluconeogenesis I	8.05	0.385	3.162	ALDOA,ALDOC,ENO1,ENO2,ENO3,GAPDH,GAPDHS,GPI,ME1,PGK1
Glucose and Glucose-1-phosphate Degradation	1.19	0.167	NaN	HK1,HKDC1
Glutamate Biosynthesis II	1.16	0.5	NaN	GLUD1
Glutamate Degradation II	0.991	0.333	NaN	GOT2
Glutamate Degradation X	1.16	0.5	NaN	GLUD1
Glutamate Receptor Signaling	0	0.0175	NaN	GLS
Glutamate Removal from Folates	1.45	1	NaN	GGH
Glutamine Degradation I	1.16	0.5	NaN	GLS
Glutaryl-CoA Degradation	3.77	0.312	2.236	HADHA,HADHB,HSD17B10,HSD17B4,PARK7
Glutathione Biosynthesis	2.44	0.667	NaN	GCLM,GSS
Glutathione Redox Reactions I	2.88	0.208	2.236	GSR,GSTP1,MGST1,MGST2,MGST3
Glutathione Redox Reactions II	3.77	0.75	NaN	GLRX,GSR,PDIA3
Glutathione-mediated Detoxification	3.11	0.188	2.449	GGH,GSTO1,GSTP1,MGST1,MGST2,MGST3
Glycerol Degradation I	0.712	0.167	NaN	GPD2
Glycerol-3-phosphate Shuttle	0.991	0.333	NaN	GPD2
Glycine Betaine Degradation	0.52	0.1	NaN	SHMT2
Glycine Biosynthesis I	1.16	0.5	NaN	SHMT2
Glycine Cleavage Complex	0.712	0.167	NaN	DLD
Glycogen Biosynthesis II (from UDP-D-Glucose)	0.654	0.143	NaN	UGP2
Glycolysis I	9.33	0.423	3.317	ALDOA,ALDOC,ENO1,ENO2,ENO3,GAPDH,GAPDHS,GPI,PGK1,PKM,TPI1
GM-CSF Signaling	0	0.0286	NaN	PPP3CB,RACK1
GNRH Signaling	0	0.0173	NaN	CDC42,RAC1,RELA
GP6 Signaling Pathway	0.387	0.042	2.236	COL4A1,COL4A2,FGB,RAC1,RHOG
GPCR-Mediated Integration of Enteroendocrine Signaling Exemplified by an L Cell	0	0.0137	NaN	PDIA3
GPCR-Mediated Nutrient Sensing in Enteroendocrine Cells	0	0.00893	NaN	PDIA3
G-Protein Coupled Receptor Signaling	0	0.00735	NaN	APEX1,RELA
Graft-versus-Host Disease Signaling	0.622	0.0625	NaN	HLA-A,HLA-B,IL18
Granulocyte Adhesion and Diapedesis	0	0.0111	NaN	IL18,ITGA3
Granzyme A Signaling	6.91	0.421	NaN	APEX1,H1-0,H1-1,H1-10,H1-2,H1-4,H1-5,NME1
Granzyme B Signaling	0.967	0.125	NaN	CYCS,DFFA
Guanine and Guanosine Salvage I	2.91	1	NaN	HPRT1,PNP
Guanosine Nucleotides Degradation III	1.19	0.167	NaN	NT5C3A,PNP
Gustation Pathway	0	0.00649	NaN	APEX1
Heme Degradation	2.15	0.5	NaN	BLVRA,BLVRB
Hepatic Cholestasis	0	0.0108	NaN	IL18,RELA
Hepatic Fibrosis / Hepatic Stellate Cell Activation	0.314	0.0376	NaN	COL4A1,COL4A2,FGF2,FN1,MYL6,RELA,SERPINE1
Hepatic Fibrosis Signaling Pathway	1.19	0.0516	4.359	ARAF,CDC42,DVL1,DVL2,DVL3,FGF2,FTH1,FTL,IL18,ITGA3,MTOR,MYL6,RAC1,RELA,RHOA,RHOC,RHOG,RHOT2,SERPINE1
HER-2 Signaling in Breast Cancer	0	0.0119	NaN	CDC42
Hereditary Breast Cancer Signaling	0.91	0.0571	NaN	ACTB,BRCA1,CDK1,HDAC2,HDAC3,RFC1,SMARCE1,UBB
HGF Signaling	0	0.027	NaN	CDC42,ITGA3,RAC1
HIF1Î± Signaling	0.246	0.0354	NaN	APEX1,LDHA,LDHB,SLC2A1
HIPPO signaling	0.236	0.0353	NaN	DLG5,PPP2R1A,YWHAE
Histamine Degradation	6.02	0.412	2.646	ALDH1A1,ALDH1A3,ALDH1B1,ALDH2,ALDH3A1,ALDH3A2,ALDH3B1
Histidine Degradation III	1.52	0.25	NaN	HAL,MTHFD1
Histidine Degradation VI	0.38	0.0667	NaN	HAL
HMGB1 Signaling	1.17	0.0606	3	CDC42,HAT1,IL18,RAC1,RELA,RHOA,RHOC,RHOG,RHOT2,SERPINE1
HOTAIR Regulatory Pathway	0	0.0312	1.342	ELAVL1,HDAC2,KDM1A,RELA,RHOC
Human Embryonic Stem Cell Pluripotency	0	0.0222	NaN	APC,DVL1,FGF2
Huntington's Disease Signaling	4.91	0.097	0.333	ATP5F1A,ATP5F1B,CAPN1,CAPN2,CAPNS1,CASP14,CLTC,CYCS,GLS,GNB4,HDAC2,HDAC3,HSPA1A/HSPA1B,HSPA2,HSPA8,HSPA9,MTOR,NCOR1,NCOR2,PSME2,PSME4,TGM2,UBB
Hypoxia Signaling in the Cardiovascular System	0.921	0.0676	NaN	HSP90B1,LDHA,NQO1,P4HB,UBE2D3
Î±-Adrenergic Signaling	0	0.0104	NaN	GNB4
Î³-glutamyl Cycle	2.23	0.273	NaN	GCLM,GGCT,GSS
Î³-linolenate Biosynthesis II (Animals)	1.69	0.176	NaN	ACSL3,ACSL4,SLC27A2
iCOS-iCOSL Signaling in T Helper Cells	0.451	0.045	2.236	HLA-A,HLA-B,PPP3CB,RAC1,RELA
IGF-1 Signaling	0	0.00962	NaN	YWHAE
IL-1 Signaling	0.662	0.0549	NaN	GNA12,GNB4,RELA,TAB2,TOLLIP
IL-10 Signaling	0.646	0.058	NaN	BLVRA,BLVRB,IL18,RELA
IL-12 Signaling and Production in Macrophages	0.491	0.0455	NaN	ALB,APOD,IL18,RAB7A,RELA,S100A8
IL-15 Production	0	0.0331	2	EPHA2,EPHB1,RELA,YES1
IL-15 Signaling	0	0.0267	NaN	MTOR,RELA
IL-17 Signaling	0	0.025	NaN	MUC5B,RELA
IL-17A Signaling in Airway Cells	0.394	0.0462	NaN	MUC5AC,MUC5B,RELA
IL-17A Signaling in Fibroblasts	0	0.0286	NaN	RELA
IL-17A Signaling in Gastric Cells	0.227	0.04	NaN	RELA
IL-23 Signaling Pathway	0	0.0227	NaN	RELA
IL-3 Signaling	0	0.0253	NaN	PPP3CB,RAC1
IL-4 Signaling	0.453	0.0471	NaN	HLA-A,HLA-B,HMGA1,MTOR
IL-6 Signaling	0	0.024	NaN	HSPB1,IL18,RELA
IL-7 Signaling Pathway	0	0.0128	NaN	SLC2A1
IL-8 Signaling	1.59	0.065	3.317	ARAF,CDC42,CSTB,GNA12,GNB4,ITGAV,MTOR,RAC1,RELA,RHOA,RHOC,RHOG,RHOT2
IL-9 Signaling	0	0.0303	NaN	RELA
ILK Signaling	2.92	0.0842	3.207	ACTA1,ACTB,CDC42,DSP,FERMT2,FN1,KRT18,MTOR,MYL6,PPP2R1A,RAC1,RELA,RHOA,RHOC,RHOG,RHOT2
Induction of Apoptosis by HIV1	1.2	0.082	2	CYCS,DFFA,RELA,SLC25A5,SLC25A6
Inflammasome pathway	0.29	0.05	NaN	IL18
Inhibition of Angiogenesis by TSP1	0	0.0294	NaN	HSPG2
Inhibition of ARE-Mediated mRNA Degradation Pathway	0.366	0.041	0.447	PPP2R1A,PSME2,PSME4,XRN1,YWHAE
Inhibition of Matrix Metalloproteases	0	0.0256	NaN	HSPG2
iNOS Signaling	0.323	0.0444	NaN	HMGA1,RELA
Inosine-5'-phosphate Biosynthesis II	0.991	0.333	NaN	ATIC
Insulin Receptor Signaling	0	0.00714	NaN	MTOR
Integrin Signaling	6.24	0.113	3.128	ACTA1,ACTB,ACTR2,ACTR3,ARF3,ARF4,ARF5,ARF6,ARPC1B,ARPC4,CAPN1,CAPN2,CAPNS1,CDC42,GSN,ITGA3,ITGAV,PFN1,PFN2,RAC1,RHOA,RHOC,RHOG,RHOT2
Interferon Signaling	2.09	0.139	1.342	IFIT1,ISG15,MX1,RELA,TAP1
Intrinsic Prothrombin Activation Pathway	0	0.0238	NaN	FGB
Iron homeostasis signaling pathway	0.678	0.0511	NaN	ACO1,ACO2,FTH1,FTL,HBB,HP,HSPA9
Isoleucine Degradation I	2.81	0.267	2	DLD,HADHA,HADHB,HSD17B10
JAK/Stat Signaling	0	0.025	NaN	MTOR,RELA
Ketogenesis	1.26	0.182	NaN	HADHA,HADHB
Ketolysis	1.33	0.2	NaN	HADHA,HADHB
Lactose Degradation III	0.712	0.167	NaN	GLB1
L-cysteine Degradation I	0.873	0.25	NaN	GOT2
Leptin Signaling in Obesity	0	0.0135	NaN	PDIA3
Leucine Degradation I	1.42	0.222	NaN	ACADM,MCCC1
Leukocyte Extravasation Signaling	0.263	0.0355	2.646	ACTA1,ACTB,CDC42,ITGA3,MYL6,RAC1,RHOA
Leukotriene Biosynthesis	2.02	0.231	NaN	LTA4H,MGST2,MGST3
Lipid Antigen Presentation by CD1	2.72	0.192	NaN	AP1G2,AP2A1,AP2M1,ARF6,PDIA3
LPS/IL-1 Mediated Inhibition of RXR Function	4.32	0.0938	NaN	ACSL3,ACSL4,ALDH18A1,ALDH1A1,ALDH1A3,ALDH1B1,ALDH1L1,ALDH2,ALDH3A1,ALDH3A2,ALDH3B1,CAT,FABP5,GSTO1,GSTP1,IL18,MGST1,MGST2,MGST3,SLC27A2,XPO1
LPS-stimulated MAPK Signaling	0.255	0.0366	NaN	CDC42,RAC1,RELA
LXR/RXR Activation	1.97	0.0826	0.378	ACACA,AHSG,ALB,APOD,IL18,NCOR1,NCOR2,RELA,S100A8,SERPINF2
Lymphotoxin Î² Receptor Signaling	0.25	0.0377	NaN	CYCS,RELA
Macropinocytosis Signaling	0.553	0.0526	NaN	ARF6,CDC42,RAC1,RHOA
Maturity Onset Diabetes of Young (MODY) Signaling	0.276	0.0476	NaN	GAPDH
Mechanisms of Viral Exit from Host Cells	1.25	0.0976	NaN	ACTA1,ACTB,CHMP2B,XPO1
Melatonin Signaling	0	0.0278	NaN	ARAF,PDIA3
Methionine Degradation I (to Homocysteine)	4.06	0.273	2.449	AHCY,AHCYL1,MAT2A,MAT2B,PRMT1,PRMT5
Methylglyoxal Degradation III	2.5	0.222	2	AKR1B1,AKR1B10,AKR1C1/AKR1C2,AKR1C3
Methylmalonyl Pathway	0.873	0.25	NaN	PCCA
Mevalonate Pathway I	1.07	0.143	NaN	HADHA,HADHB
MIF Regulation of Innate Immunity	0.358	0.0476	NaN	MIF,RELA
MIF-mediated Glucocorticoid Regulation	0.471	0.0588	NaN	MIF,RELA
Mismatch Repair in Eukaryotes	0.967	0.125	NaN	FEN1,RFC1
Mitochondrial Dysfunction	7.41	0.135	NaN	ACO1,ACO2,ATP5F1A,ATP5F1B,ATP5MF,ATP5PO,CAT,CYC1,CYCS,GPD2,GSR,HSD17B10,MT-ATP6,MT-CO3,MT-ND5,NDUFA4,PARK7,PRDX3,RHOT2,UQCR10,UQCRC1,VDAC1,VDAC2
Mitochondrial L-carnitine Shuttle Pathway	1.69	0.176	NaN	ACSL3,ACSL4,SLC27A2
Mitotic Roles of Polo-Like Kinase	3.31	0.136	2.236	ANAPC1,CAPN1,CDK1,HSP90B1,KIF23,PLK1,PPP2R1A,PRC1,SLK
Molecular Mechanisms of Cancer	0.818	0.046	NaN	APC,BRCA1,CDC42,CDK1,CDK12,CDK13,CYCS,DVL1,GNA12,HAT1,ITGA3,RAC1,RELA,RHOA,RHOC,RHOG,RHOT2,TAB2
Mouse Embryonic Stem Cell Pluripotency	0.306	0.0388	2	APC,DVL1,DVL2,DVL3
MSP-RON Signaling Pathway	0	0.0345	NaN	ACTA1,ACTB
mTOR Signaling	13.7	0.167	2.121	CDC42,EIF3E,EIF3K,EIF3L,EIF4A1,EIF4A2,FAU,MTOR,PPP2R1A,RAC1,RHOA,RHOC,RHOG,RHOT2,RPS11,RPS12,RPS14,RPS15A,RPS16,RPS18,RPS2,RPS21,RPS23,RPS25,RPS26,RPS27,RPS29,RPS3,RPS4X,RPS5,RPS6,RPS7,RPS8,RPS9,RPSA
Myc Mediated Apoptosis Signaling	0	0.02	NaN	CYCS
N-acetylglucosamine Degradation I	0.991	0.333	NaN	GNPDA1
N-acetylglucosamine Degradation II	0.873	0.25	NaN	GNPDA1
NAD biosynthesis II (from tryptophan)	0.456	0.0833	NaN	KYNU
NAD Biosynthesis III	0.712	0.167	NaN	NAMPT
NAD Salvage Pathway II	0.217	0.0385	NaN	NT5C3A
NADH Repair	0.991	0.333	NaN	GAPDH
Natural Killer Cell Signaling	1.04	0.0558	2.111	CDC42,HLA-A,HLA-B,HSPA1A/HSPA1B,HSPA2,HSPA8,HSPA9,IL18,MTOR,RAC1,RELA
Necroptosis Signaling Pathway	2.42	0.0828	3.606	CAPN1,CAPN2,CAPNS1,EIF2AK2,GLUD1,PPIF,PPP3CB,SLC25A5,SLC25A6,TAB2,TOMM70,VDAC1,VDAC2
NER Pathway	0.804	0.0583	1	DDB1,GPS1,HMGN1,NEDD8,POLA2,RFC1
Netrin Signaling	0	0.0308	NaN	PPP3CB,RAC1
Neuregulin Signaling	0.6	0.0521	NaN	ERBIN,HSP90B1,ITGA3,MTOR,RPS6
Neuroinflammation Signaling Pathway	0	0.0267	1.134	GLS,HLA-A,HLA-B,IDE,IL18,IRF7,PPP3CB,RELA
Neuropathic Pain Signaling In Dorsal Horn Neurons	0	0.0099	NaN	PDIA3
Neuroprotective Role of THOP1 in Alzheimer's Disease	0.921	0.0598	NaN	HLA-A,HLA-B,IDE,LONP1,PREP,PRSS3,YWHAE
Neurotrophin/TRK Signaling	0	0.0132	NaN	CDC42
NF-ÎºB Activation by Viruses	0.484	0.0488	2	EIF2AK2,ITGA3,ITGAV,RELA
NF-ÎºB Signaling	0	0.0335	1.633	ARAF,EIF2AK2,HDAC2,IL18,RELA,TAB2
NGF Signaling	0.426	0.0439	2.236	CDC42,RAC1,RELA,RHOA,RHOG
Nitric Oxide Signaling in the Cardiovascular System	0	0.0303	NaN	ATP2A2,ATP2A3,HSP90B1
nNOS Signaling in Neurons	1.08	0.0851	NaN	CAPN1,CAPN2,CAPNS1,PPP3CB
Noradrenaline and Adrenaline Degradation	4.63	0.229	2.828	ADH5,ALDH1A1,ALDH1A3,ALDH1B1,ALDH2,ALDH3A1,ALDH3A2,ALDH3B1
NRF2-mediated Oxidative Stress Response	7.85	0.132	3.742	ACTA1,ACTB,CAT,CBR1,CCT7,DNAJA1,DNAJB6,DNAJC7,EPHX1,FTH1,FTL,GCLM,GSR,GSTO1,GSTP1,HACD3,MGST1,MGST2,MGST3,NQO1,PPIB,SQSTM1,STIP1,UBB,VCP
Nur77 Signaling in T Lymphocytes	1.76	0.102	NaN	CYCS,HDAC2,HLA-A,HLA-B,MEF2D,PPP3CB
Opioid Signaling Pathway	0	0.0324	2.121	AP1G2,AP2A1,AP2M1,CDC42,CLTC,PPP3CB,RAC1,YES1
Osteoarthritis Pathway	1.15	0.0569	2.828	ANXA5,CASP14,FGF2,FN1,HDAC3,ITGA3,MTOR,NAMPT,RAC1,RELA,S100A8,S100A9
Ovarian Cancer Signaling	0	0.0288	NaN	APC,BRCA1,DVL1,MTOR
OX40 Signaling Pathway	0	0.0333	NaN	HLA-A,HLA-B,RELA
Oxidative Ethanol Degradation III	5.64	0.368	2.646	ALDH1A1,ALDH1A3,ALDH1B1,ALDH2,ALDH3A1,ALDH3A2,ALDH3B1
Oxidative Phosphorylation	3.33	0.11	3.464	ATP5F1A,ATP5F1B,ATP5MF,ATP5PO,CYC1,CYCS,MT-ATP6,MT-CO3,MT-ND5,NDUFA4,UQCR10,UQCRC1
P2Y Purigenic Receptor Signaling Pathway	0	0.0236	NaN	GNB4,PDIA3,RELA
p38 MAPK Signaling	0.395	0.0424	2.236	HMGN1,HSPB1,IL18,MEF2D,TAB2
p53 Signaling	0	0.0204	NaN	BRCA1,PML
p70S6K Signaling	0.319	0.0388	1	MTOR,PDIA3,PPP2R1A,RPS6,YWHAE
PAK Signaling	0.349	0.0412	2	CDC42,ITGA3,MYL6,RAC1
Pancreatic Adenocarcinoma Signaling	0	0.0275	NaN	CDC42,RAC1,RELA
Parkinson's Signaling	1.76	0.188	NaN	CYCS,PARK7,UCHL1
Paxillin Signaling	1.43	0.0741	1.89	ACTA1,ACTB,ARF6,CDC42,ITGA3,ITGAV,PTPN12,RAC1
PCP pathway	2.3	0.117	2.646	DVL1,DVL2,DVL3,PFN1,PFN2,RAC1,RHOA
PD-1, PD-L1 cancer immunotherapy pathway	0	0.0189	NaN	HLA-A,HLA-B
PDGF Signaling	0	0.0116	NaN	EIF2AK2
PEDF Signaling	0.255	0.0366	NaN	RAC1,RELA,RHOA
Pentose Phosphate Pathway	2.36	0.3	NaN	PGD,RPIA,TKT
Pentose Phosphate Pathway (Non-oxidative Branch)	1.77	0.333	NaN	RPIA,TKT
Pentose Phosphate Pathway (Oxidative Branch)	0.873	0.25	NaN	PGD
PFKFB4 Signaling Pathway	1.11	0.087	1	FGF2,GPI,HK1,TKT
Phagosome Formation	1.48	0.072	NaN	CDC42,FN1,ITGA3,PDIA3,RAC1,RHOA,RHOC,RHOG,RHOT2
Phagosome Maturation	5.18	0.119	NaN	DYNLL1,HLA-A,HLA-B,M6PR,PRDX2,RAB5C,RAB7A,TAP1,TUBA1A,TUBA1C,TUBA4A,TUBA4B,TUBB,TUBB2A,TUBB3,TUBB4A,TUBB4B,TUBB6
Phenylalanine Degradation IV (Mammalian, via Side Chain)	2.94	0.286	2	ALDH2,ALDH3A2,GOT2,SLC27A2
Phenylethylamine Degradation I	2.15	0.5	NaN	ALDH2,ALDH3A2
Phospholipase C Signaling	1.4	0.0584	3.051	CDC42,GNB4,HDAC2,HDAC3,ITGA3,MEF2D,MYL6,PPP3CB,RAC1,RELA,RHOA,RHOC,RHOG,RHOT2,TGM2
Phospholipases	0	0.0159	NaN	PDIA3
PI3K Signaling in B Lymphocytes	0	0.029	2	PDIA3,PPP3CB,RAC1,RELA
PI3K/AKT Signaling	0	0.0343	1.633	HSP90B1,ITGA3,MTOR,PPP2R1A,RELA,YWHAE
PKCÎ¸ Signaling in T Lymphocytes	0	0.0323	2.236	HLA-A,HLA-B,PPP3CB,RAC1,RELA
Polyamine Regulation in Colon Cancer	1.39	0.136	NaN	APC,PSME2,PSME4
PPAR Signaling	0.79	0.0577	-1.633	HSP90B1,IL18,NCOR1,NCOR2,RELA,SNW1
PPARÎ±/RXRÎ± Activation	0.449	0.0421	-1.633	CAND1,GOT2,GPD2,HSP90B1,NCOR1,NCOR2,PDIA3,RELA
Primary Immunodeficiency Signaling	0.275	0.04	NaN	TAP1,TAP2
Production of Nitric Oxide and Reactive Oxygen Species in Macrophages	1.46	0.0638	2.111	ALB,APOD,CAT,CDC42,PPP2R1A,RAC1,RELA,RHOA,RHOC,RHOG,RHOT2,S100A8
Proline Biosynthesis I	0.873	0.25	NaN	ALDH18A1
Prostate Cancer Signaling	0.397	0.044	NaN	GSTP1,HSP90B1,MTOR,RELA
Protein Kinase A Signaling	0.943	0.0477	1.807	ANAPC1,APEX1,GNB4,H1-0,H1-1,H1-10,H1-2,H1-4,H1-5,KDELR1,MYL6,PDIA3,PPP3CB,PTPN12,PTPN13,PTPN14,RELA,RHOA,YWHAE
Protein Ubiquitination Pathway	11	0.132	NaN	ANAPC1,BRCA1,DNAJA1,DNAJB6,DNAJC7,HLA-A,HLA-B,HSP90B1,HSPA1A/HSPA1B,HSPA2,HSPA8,HSPA9,HSPB1,HSPD1,PSMA1,PSMA2,PSMA3,PSMA4,PSMA6,PSMA7,PSMB1,PSMB2,PSMB3,PSMB5,PSMC1,PSMC4,PSMC6,PSMD13,PSMD2,PSMD3,PSME2,TAP1,TAP2,UBB,UBE2D3,UCHL1
PTEN Signaling	0	0.0317	-2	CDC42,ITGA3,RAC1,RELA
Purine Nucleotides De Novo Biosynthesis II	3.38	0.364	2	ATIC,GART,IMPDH2,PFAS
Purine Nucleotides Degradation II (Aerobic)	1.62	0.167	NaN	IMPDH2,NT5C3A,PNP
Purine Ribonucleosides Degradation to Ribose-1-phosphate	0.654	0.143	NaN	PNP
Putrescine Degradation III	5.3	0.333	2.646	ALDH1A1,ALDH1A3,ALDH1B1,ALDH2,ALDH3A1,ALDH3A2,ALDH3B1
PXR/RXR Activation	0.394	0.0462	NaN	ALDH1A1,ALDH3A2,RELA
Pyridoxal 5'-phosphate Salvage Pathway	1.1	0.0769	2.236	ARAF,CDK1,EIF2AK2,PLK1,TTK
Pyrimidine Deoxyribonucleotides De Novo Biosynthesis I	2.17	0.182	2	AK9,DTYMK,NME1,NME2
Pyrimidine Ribonucleotides De Novo Biosynthesis	1.77	0.116	2.236	AK9,NME1,NME2,NUDT5,UMPS
Pyrimidine Ribonucleotides Interconversion	1.25	0.0976	2	AK9,NME1,NME2,NUDT5
Pyruvate Fermentation to Lactate	1.77	0.333	NaN	LDHA,LDHB
Rac Signaling	1.75	0.0804	3	ACTR2,ACTR3,ARPC1B,ARPC4,CDC42,ITGA3,RAC1,RELA,RHOA
RAN Signaling	2.6	0.235	2	IPO5,KPNB1,RAN,XPO1
RANK Signaling in Osteoclasts	0.425	0.0455	2	GSN,PPP3CB,RELA,TAB2
RAR Activation	2.83	0.0825	NaN	ACTB,AKR1B1,AKR1B10,AKR1C3,ALDH1A1,ALDH1A3,NCOR1,NCOR2,PML,PRMT1,RAC1,RELA,RPL7A,SMARCE1,SNW1,TRIM24
Reelin Signaling in Neurons	1.79	0.0775	3.162	ACTR2,ACTR3,ARPC1B,ARPC4,CDC42,ITGA3,MTOR,RAC1,RHOA,YES1
Regulation of Actin-based Motility by Rho	7.55	0.181	4	ACTA1,ACTB,ACTR2,ACTR3,ARPC1B,ARPC4,CDC42,GSN,ITGA3,MYL6,PFN1,PFN2,RAC1,RHOA,RHOC,RHOG,RHOT2
Regulation of Cellular Mechanics by Calpain Protease	1.1	0.0769	1.342	CAPN1,CAPN2,CAPNS1,CDK1,ITGA3
Regulation of eIF4 and p70S6K Signaling	15.2	0.204	1	EIF2S3,EIF3E,EIF3K,EIF3L,EIF4A1,EIF4A2,FAU,ITGA3,MTOR,PABPC1,PPP2R1A,RPS11,RPS12,RPS14,RPS15A,RPS16,RPS18,RPS2,RPS21,RPS23,RPS25,RPS26,RPS27,RPS29,RPS3,RPS4X,RPS5,RPS6,RPS7,RPS8,RPS9,RPSA
Regulation of IL-2 Expression in Activated and Anergic T Lymphocytes	0	0.0337	NaN	PPP3CB,RAC1,RELA
Regulation of the Epithelial-Mesenchymal Transition Pathway	0.435	0.0417	NaN	APC,ARAF,DVL1,DVL2,DVL3,FGF2,RELA,RHOA
Relaxin Signaling	0	0.0267	NaN	APEX1,GNA12,GNB4,RELA
Remodeling of Epithelial Adherens Junctions	12.9	0.294	2.828	ACTA1,ACTB,ACTR2,ACTR3,APC,ARF6,ARPC1B,ARPC4,NME1,RAB5C,RAB7A,TUBA1A,TUBA1C,TUBA4A,TUBB,TUBB2A,TUBB3,TUBB4A,TUBB4B,TUBB6
Renal Cell Carcinoma Signaling	0.506	0.05	NaN	CDC42,RAC1,SLC2A1,UBB
Renin-Angiotensin Signaling	0	0.0169	NaN	RAC1,RELA
Retinoate Biosynthesis I	2.19	0.147	2	AKR1B1,AKR1B10,AKR1C3,ALDH1A1,ALDH1A3
Retinoic acid Mediated Apoptosis Signaling	0	0.0333	NaN	CYCS,PARP12
Retinol Biosynthesis	0.358	0.0476	NaN	AKR1B10,AKR1C3
RhoA Signaling	2.86	0.0976	3.317	ACTA1,ACTB,ACTR2,ACTR3,ANLN,ARPC1B,ARPC4,GNA12,MYL6,PFN1,PFN2,RHOA
RhoGDI Signaling	3.18	0.0889	-3.742	ACTA1,ACTB,ACTR2,ACTR3,ARPC1B,ARPC4,CDC42,GNA12,GNB4,ITGA3,MYL6,RAC1,RHOA,RHOC,RHOG,RHOT2
Role of BRCA1 in DNA Damage Response	0.818	0.0625	NaN	ACTB,BRCA1,PLK1,RFC1,SMARCE1
Role of CHK Proteins in Cell Cycle Checkpoint Control	1.3	0.0877	0	BRCA1,CDK1,PLK1,PPP2R1A,RFC1
Role of Cytokines in Mediating Communication between Immune Cells	0	0.0185	NaN	IL18
Role of Hypercytokinemia/hyperchemokinemia in the Pathogenesis of Influenza	0	0.0233	NaN	IL18
Role of IL-17A in Arthritis	0	0.0182	NaN	RELA
Role of IL-17A in Psoriasis	2.02	0.231	NaN	S100A7,S100A8,S100A9
Role of IL-17F in Allergic Inflammatory Airway Diseases	0	0.0238	NaN	RELA
Role of JAK1, JAK2 and TYK2 in Interferon Signaling	0.238	0.0417	NaN	RELA
Role of Macrophages, Fibroblasts and Endothelial Cells in Rheumatoid Arthritis	0.376	0.0385	NaN	APC,DVL1,FGF2,FN1,IL18,MIF,PDIA3,PPP3CB,PRSS3,RAC1,RELA,RHOA
Role of NANOG in Mammalian Embryonic Stem Cell Pluripotency	0	0.0168	NaN	APC,DVL1
Role of NFAT in Cardiac Hypertrophy	0	0.028	NaN	GNB4,HDAC2,HDAC3,MEF2D,PDIA3,PPP3CB
Role of NFAT in Regulation of the Immune Response	0.511	0.0442	2.449	GNA12,GNB4,HLA-A,HLA-B,MEF2D,PPP3CB,RELA,XPO1
Role of Oct4 in Mammalian Embryonic Stem Cell Pluripotency	0.656	0.0652	NaN	BRCA1,IGF2BP1,PHB
Role of Osteoblasts, Osteoclasts and Chondrocytes in Rheumatoid Arthritis	0.287	0.0364	NaN	APC,DVL1,GSN,IL18,ITGA3,PPP3CB,RELA,TAB2
Role of p14/p19ARF in Tumor Suppression	0	0.0345	NaN	RAC1
Role of Pattern Recognition Receptors in Recognition of Bacteria and Viruses	0.336	0.039	NaN	EIF2AK2,IL18,IRF7,OAS2,OAS3,RELA
Role of PI3K/AKT Signaling in the Pathogenesis of Influenza	0	0.0156	NaN	RELA
Role of PKR in Interferon Induction and Antiviral Response	2.54	0.094	0.302	CYCS,EIF2AK2,HSP90B1,HSPA1A/HSPA1B,HSPA2,HSPA8,HSPA9,IL18,PRKRA,RELA,TAB2
Role of RIG1-like Receptors in Antiviral Innate Immunity	0.334	0.0455	NaN	IRF7,RELA
Role of Tissue Factor in Cancer	2.07	0.0855	NaN	CDC42,FGB,GNA12,ITGA3,ITGAV,MTOR,P4HB,PDIA6,RAC1,YES1
Role of Wnt/GSK-3Î² Signaling in the Pathogenesis of Influenza	0.851	0.0641	1	APC,DVL1,DVL2,DVL3,NCOA2
S-adenosyl-L-methionine Biosynthesis	2.44	0.667	NaN	MAT2A,MAT2B
Salvage Pathways of Pyrimidine Ribonucleotides	1.67	0.0825	2.828	AK9,ARAF,CDK1,EIF2AK2,NME1,NME2,PLK1,TTK
SAPK/JNK Signaling	0	0.0294	NaN	CDC42,GNA12,RAC1
Semaphorin Signaling in Neurons	1.73	0.1	NaN	CDC42,RAC1,RHOA,RHOC,RHOG,RHOT2
Senescence Pathway	1.19	0.0545	1.604	ANAPC1,ARAF,CAPN1,CAPN2,CAPNS1,CAT,CDK1,DLD,MTOR,PML,PPP2R1A,PPP3CB,RNF2,SERPINE1,SQSTM1
Serine Biosynthesis	0.785	0.2	NaN	PHGDH
Serotonin Degradation	2.62	0.119	2.828	ADH5,ALDH1A1,ALDH1A3,ALDH1B1,ALDH2,ALDH3A1,ALDH3A2,ALDH3B1
Sertoli Cell-Sertoli Cell Junction Signaling	2.62	0.0811	NaN	ACTA1,ACTB,CDC42,ITGA3,JUP,RAC1,TUBA1A,TUBA1C,TUBA4A,TUBB,TUBB2A,TUBB3,TUBB4A,TUBB4B,TUBB6
Signaling by Rho Family GTPases	2.21	0.0697	3.873	ACTA1,ACTB,ACTR2,ACTR3,ARPC1B,ARPC4,CDC42,GNA12,GNB4,ITGA3,MYL6,RAC1,RELA,RHOA,RHOC,RHOG,RHOT2
Sirtuin Signaling Pathway	8.99	0.117	0.626	APEX1,ATP5F1A,ATP5F1B,CYC1,GLS,GLUD1,GOT2,H1-0,H1-1,H1-10,H1-2,H1-4,H1-5,LDHA,LDHB,MT-ATP6,MT-ND5,MTOR,NAMPT,NDUFA4,NQO1,PGK1,PPIF,RELA,SLC25A5,SLC25A6,SLC2A1,TOMM70,TUBA1A,TUBA1C,TUBA4A,TUBA4B,VDAC1,VDAC2
Small Cell Lung Cancer Signaling	0	0.0282	NaN	CYCS,RELA
Sonic Hedgehog Signaling	0	0.0345	NaN	CDK1
Sperm Motility	0	0.0179	NaN	EPHA2,EPHB1,PDIA3,YES1
Sphingosine-1-phosphate Signaling	1.64	0.0769	2.121	CASP14,CDC42,GNA12,PDIA3,RAC1,RHOA,RHOC,RHOG,RHOT2
SPINK1 General Cancer Pathway	0	0.0145	NaN	PRSS3
SPINK1 Pancreatic Cancer Pathway	0	0.0333	NaN	CPA4,PRSS3
STAT3 Pathway	0	0.0148	NaN	FGF2,RAC1
Stearate Biosynthesis I (Animals)	1.61	0.106	2.236	ACOT7,ACSL3,ACSL4,ELOVL1,SLC27A2
Sucrose Degradation V (Mammalian)	2.5	0.333	NaN	ALDOA,ALDOC,TPI1
Sumoylation Pathway	4.17	0.126	-2.449	CBX4,CDC42,HDAC2,KDM1A,PML,RAC1,RAN,RFC1,RHOA,RHOC,RHOG,RHOT2,UBA2
Superoxide Radicals Degradation	1.52	0.25	NaN	CAT,NQO1
Superpathway of Cholesterol Biosynthesis	1.09	0.103	NaN	DHCR7,HADHA,HADHB
Superpathway of Citrulline Metabolism	1.84	0.2	NaN	ALDH18A1,ARG1,GLS
Superpathway of Geranylgeranyldiphosphate Biosynthesis I (via Mevalonate)	0.883	0.111	NaN	HADHA,HADHB
Superpathway of Inositol Phosphate Compounds	0	0.0202	2	ATP1A1,NUDT5,PTPN12,PTPN13
Superpathway of Methionine Degradation	5.38	0.243	3	AHCY,AHCYL1,DLD,GOT2,MAT2A,MAT2B,PCCA,PRMT1,PRMT5
Superpathway of Serine and Glycine Biosynthesis I	1.63	0.286	NaN	PHGDH,SHMT2
Synaptic Long Term Depression	0	0.0159	NaN	GNA12,PDIA3,PPP2R1A
Synaptic Long Term Potentiation	0	0.0155	NaN	PDIA3,PPP3CB
Synaptogenesis Signaling Pathway	1.29	0.0545	3.638	ACTR2,ACTR3,AP1G2,AP2A1,AP2M1,ARPC1B,ARPC4,CDC42,EPHA2,EPHB1,HSPA8,ITSN1,MTOR,RAB5C,RAC1,RHOA,YES1
Systemic Lupus Erythematosus In B Cell Signaling Pathway	0	0.0327	3	IFIT2,IL18,IRF7,ISG15,MTOR,PPP3CB,RAC1,RELA,YES1
Systemic Lupus Erythematosus In T Cell Signaling Pathway	0.539	0.042	3.207	CASP14,CDC42,GNA12,HLA-A,HLA-B,MTOR,PPP2R1A,PPP3CB,RAC1,RHOA,RHOC,RHOG,RHOT2,YES1
Systemic Lupus Erythematosus Signaling	3.29	0.083	NaN	EFTUD2,HLA-A,HLA-B,IL18,LSM12,MTOR,PRPF19,PRPF4,PRPF40A,SF3B4,SNRPA1,SNRPB,SNRPC,SNRPD1,SNRPD2,SNRPD3,SNRPE,SNRPF,SNRPG
T Cell Exhaustion Signaling Pathway	0	0.0229	NaN	HLA-A,HLA-B,MTOR,PPP2R1A
T Cell Receptor Signaling	0	0.0286	NaN	PPP3CB,RAC1,RELA
T Helper Cell Differentiation	0.321	0.0411	NaN	HLA-A,HLA-B,IL18
TCA Cycle II (Eukaryotic)	2.88	0.208	2.236	ACO1,ACO2,CS,DLD,DLST
Tec Kinase Signaling	2.68	0.0854	3.162	ACTA1,ACTB,CDC42,GNA12,GNB4,GTF2I,ITGA3,RAC1,RELA,RHOA,RHOC,RHOG,RHOT2,YES1
Telomerase Signaling	0.487	0.0467	NaN	HDAC2,HDAC3,HSP90B1,POT1,PPP2R1A
Telomere Extension by Telomerase	0.38	0.0667	NaN	POT1
Tetrahydrofolate Salvage from 5,10-methenyltetrahydrofolate	1.94	0.4	NaN	GART,MTHFD1
TGF-Î² Signaling	0	0.0312	NaN	CDC42,IRF7,SERPINE1
Th1 and Th2 Activation Pathway	0	0.0175	NaN	HLA-A,HLA-B,IL18
Th1 Pathway	0	0.0248	NaN	HLA-A,HLA-B,IL18
Th17 Activation Pathway	0	0.033	NaN	HSP90B1,MTOR,RELA
Th2 Pathway	0	0.0147	NaN	HLA-A,HLA-B
The Visual Cycle	0.807	0.1	NaN	AKR1B10,AKR1C3
Thrombin Signaling	0.924	0.0529	2.646	CDC42,GNA12,GNB4,MYL6,PDIA3,RAC1,RELA,RHOA,RHOC,RHOG,RHOT2
Thyroid Cancer Signaling	0	0.0127	NaN	MTOR
Tight Junction Signaling	1.79	0.0714	NaN	ACTA1,ACTB,CDC42,CPSF2,CPSF6,MARK2,MYL6,PPP2R1A,RAB13,RAC1,RELA,RHOA
TNFR1 Signaling	0.588	0.06	NaN	CDC42,CYCS,RELA
TNFR2 Signaling	0	0.0333	NaN	RELA
Toll-like Receptor Signaling	1.29	0.0789	NaN	EIF2AK2,IL18,RELA,TAB2,TOLLIP,UBB
TR/RXR Activation	5.13	0.155	NaN	ACACA,AKR1C1/AKR1C2,AKR1C3,ENO1,HDAC3,HP,ME1,MTOR,NCOA2,NCOR1,NCOR2,SLC2A1,STRBP
Transcriptional Regulatory Network in Embryonic Stem Cells	0	0.0185	NaN	TRIM24
Trehalose Degradation II (Trehalase)	1.63	0.286	NaN	HK1,HKDC1
TREM1 Signaling	0	0.0267	NaN	IL18,RELA
Triacylglycerol Biosynthesis	0.358	0.0476	NaN	ELOVL1,LPIN2
tRNA Charging	1.32	0.103	2	DARS1,FARSA,HARS1,WARS1
tRNA Splicing	0	0.0233	NaN	APEX1
Tryptophan Degradation III (Eukaryotic)	3.94	0.261	2.449	HADHA,HADHB,HSD17B10,HSD17B4,KYNU,PARK7
Tryptophan Degradation to 2-amino-3-carboxymuconate Semialdehyde	0.712	0.167	NaN	KYNU
Tryptophan Degradation X (Mammalian, via Tryptamine)	5.83	0.32	2.646	AKR1B10,ALDH1A1,ALDH1A3,ALDH1B1,ALDH2,ALDH3A1,ALDH3A2,ALDH3B1
Tumoricidal Function of Hepatic Natural Killer Cells	1.29	0.125	NaN	CYCS,DFFA,M6PR
TWEAK Signaling	0.455	0.0571	NaN	CYCS,RELA
Type I Diabetes Mellitus Signaling	0.451	0.045	NaN	CYCS,HLA-A,HLA-B,HSPD1,RELA
Type II Diabetes Mellitus Signaling	0.413	0.0423	NaN	ACSL3,ACSL4,MTOR,PKM,RELA,SLC27A2
UDP-N-acetyl-D-galactosamine Biosynthesis II	3.07	0.308	NaN	GNPDA1,GPI,HK1,HKDC1
Unfolded protein response	3.13	0.143	2.646	HSP90B1,HSPA1A/HSPA1B,HSPA2,HSPA8,HSPA9,P4HB,PDIA6,VCP
Urate Biosynthesis/Inosine 5'-phosphate Degradation	2.02	0.231	NaN	IMPDH2,NT5C3A,PNP
Urea Cycle	0.712	0.167	NaN	ARG1
Uridine-5'-phosphate Biosynthesis	1.16	0.5	NaN	UMPS
UVA-Induced MAPK Signaling	0.341	0.0408	NaN	CYCS,MTOR,PARP12,PDIA3
UVB-Induced MAPK Signaling	0	0.0192	NaN	MTOR
UVC-Induced MAPK Signaling	0	0.0196	NaN	ARAF
Valine Degradation I	1.62	0.167	NaN	DLD,HADHA,HADHB
VDR/RXR Activation	0.282	0.0385	NaN	NCOA2,NCOR1,NCOR2
VEGF Signaling	0.567	0.0505	NaN	ACTA1,ACTB,EIF2S3,ELAVL1,YWHAE
Virus Entry via Endocytic Pathways	4	0.121	NaN	ACTA1,ACTB,AP1G2,AP2A1,AP2M1,AP3M1,CDC42,CLTC,HLA-A,HLA-B,ITGA3,ITSN1,RAC1
Vitamin-C Transport	2.03	0.167	2	GLRX,GSTO1,SLC23A2,SLC2A1
White Adipose Tissue Browning Pathway	0	0.0155	NaN	LDHA,LDHB
Wnt/Ca+ pathway	1.17	0.0806	2.236	DVL1,DVL2,DVL3,PDIA3,RELA
Wnt/Î²-catenin Signaling	0.387	0.0405	0.816	APC,DVL1,DVL2,DVL3,MARK2,PPP2R1A,UBB
Xanthine and Xanthosine Salvage	1.45	1	NaN	PNP
Xenobiotic Metabolism CAR Signaling Pathway	4.37	0.101	4.359	ALDH18A1,ALDH1A1,ALDH1A3,ALDH1B1,ALDH1L1,ALDH2,ALDH3A1,ALDH3A2,ALDH3B1,DNAJC7,GSTO1,GSTP1,HSP90B1,MGST1,MGST2,MGST3,PPP2R1A,RACK1,SNW1
Xenobiotic Metabolism General Signaling Pathway	0.618	0.049	2.646	FTL,GSTO1,GSTP1,MGST1,MGST2,MGST3,NQO1
Xenobiotic Metabolism PXR Signaling Pathway	4.8	0.104	2.683	ALDH18A1,ALDH1A1,ALDH1A3,ALDH1B1,ALDH1L1,ALDH2,ALDH3A1,ALDH3A2,ALDH3B1,CAT,DNAJC7,GSTO1,GSTP1,HSP90B1,MGST1,MGST2,MGST3,NCOR1,NCOR2,SNW1
Xenobiotic Metabolism Signaling	3.63	0.0801	NaN	ALDH18A1,ALDH1A1,ALDH1A3,ALDH1B1,ALDH1L1,ALDH2,ALDH3A1,ALDH3A2,ALDH3B1,CAT,DNAJC7,FTL,GSTO1,GSTP1,HSP90B1,MGST1,MGST2,MGST3,NCOR2,NQO1,PPP2R1A,RELA,SNW1

## Sheet: HDAC3_LPS canonical pathways
Â© 2000-2020 QIAGEN. All rights reserved.
Ingenuity Canonical Pathways	-log(p-value)	Ratio	z-score	Molecules
14-3-3-mediated Signaling	6.75	0.142	2.121	BAX,GSK3A,PDIA3,SFN,TUBA1A,TUBA1C,TUBA4A,TUBB,TUBB2A,TUBB3,TUBB4A,TUBB4B,TUBB6,YWHAB,YWHAE,YWHAG,YWHAQ,YWHAZ
2-ketoglutarate Dehydrogenase Complex	2	0.4	NaN	DLD,DLST
2-oxobutanoate Degradation I	2	0.4	NaN	DLD,PCCA
3-phosphoinositide Biosynthesis	0	0.0182	NaN	ATP1A1,NUDT5,PTPN12
3-phosphoinositide Degradation	0	0.0194	NaN	ATP1A1,NUDT5,PTPN12
4-1BB Signaling in T Lymphocytes	0	0.0312	NaN	RELA
5-aminoimidazole Ribonucleotide Biosynthesis I	1.02	0.333	NaN	GART
Acetyl-CoA Biosynthesis I (Pyruvate Dehydrogenase Complex)	0.682	0.143	NaN	DLD
Actin Cytoskeleton Signaling	5.5	0.101	4.583	ACTA1,ACTB,ACTN1,ACTN2,ACTN4,ACTR3,APC,ARPC1B,ARPC4,CDC42,EZR,F2,FGF2,FN1,ITGA3,MSN,MYL6,PFN1,PFN2,RAC1,RDX,RHOA
Actin Nucleation by ARP-WASP Complex	3.25	0.125	3	ACTR3,ARPC1B,ARPC4,CDC42,ITGA3,RAC1,RHOA,RHOC,RHOG
Activation of IRF by Cytosolic Pattern Recognition Receptors	0.821	0.0635	1	IFIT2,ISG15,PPIB,RELA
Acute Myeloid Leukemia Signaling	0.25	0.0337	NaN	IDH1,MTOR,RELA
Acute Phase Response Signaling	0.87	0.0503	2.828	F2,FGB,FN1,FTL,HP,IL18,MTOR,RELA,SERPINE1
Acyl-CoA Hydrolysis	0.453	0.0769	NaN	ACOT7
Adenine and Adenosine Salvage I	2.97	1	NaN	APRT,PNP
Adenine and Adenosine Salvage III	1.83	0.333	NaN	HPRT1,PNP
Adenosine Nucleotides Degradation II	1.07	0.133	NaN	NT5C3A,PNP
Adipogenesis pathway	0.821	0.0522	NaN	CDK5,FGF2,HAT1,HDAC2,HDAC3,HDAC7,KDM1A
Adrenomedullin signaling pathway	0	0.0254	1.342	BAX,GSK3A,IL18,PDIA3,RELA
Agranulocyte Adhesion and Diapedesis	0.735	0.0466	NaN	ACTA1,ACTB,EZR,FN1,IL18,ITGA3,MSN,MYL6,RDX
Agrin Interactions at Neuromuscular Junction	1.35	0.0759	2.449	ACTA1,ACTB,CDC42,DVL1,ITGA3,RAC1
Aldosterone Signaling in Epithelial Cells	2.23	0.0759	NaN	AHCY,DNAJA1,DNAJC7,HSP90B1,HSPA1A/HSPA1B,HSPA2,HSPA5,HSPA8,HSPA9,HSPB1,HSPD1,PDIA3
Allograft Rejection Signaling	0.269	0.0349	NaN	HLA-A,HLA-B,HLA-G
Altered T Cell and B Cell Signaling in Rheumatoid Arthritis	0.467	0.0444	NaN	HLA-A,HLA-B,IL18,RELA
AMPK Signaling	1.02	0.0514	-0.333	ACACA,ACACB,ACTB,ELAVL1,MTOR,PPM1G,PPP2R1A,RAB1A,RAB7A,SLC2A1,SMARCE1
Amyloid Processing	1.63	0.1	2	CAPN1,CAPN2,CAPNS1,CDK5,CSNK2A1
Amyotrophic Lateral Sclerosis Signaling	2.34	0.0928	1.667	BAX,CAPN1,CAPN2,CAPNS1,CAT,CYCS,RAB5C,RAC1,SSR4
Androgen Biosynthesis	0.384	0.0625	NaN	AKR1C3
Androgen Signaling	0	0.0147	NaN	GNB4,RELA
Angiopoietin Signaling	0	0.0133	NaN	RELA
Antigen Presentation Pathway	3.61	0.179	NaN	HLA-A,HLA-B,HLA-G,PDIA3,PSMB5,TAP1,TAP2
Antioxidant Action of Vitamin C	0.544	0.0459	NaN	GLRX,GSTO1,PDIA3,RELA,SLC2A1
Antiproliferative Role of Somatostatin Receptor 2	0	0.013	NaN	GNB4
Antiproliferative Role of TOB in T Cell Signaling	0.435	0.0513	NaN	PABPC1,PABPC4
Apelin Adipocyte Signaling Pathway	0.55	0.0488	2	CAT,GSTP1,MGST1,MGST3
Apelin Cardiac Fibroblast Signaling Pathway	0.272	0.0435	NaN	SERPINE1
Apelin Cardiomyocyte Signaling Pathway	0.648	0.0505	2.236	ATP2A2,ATP2A3,CAT,MYL6,PDIA3
Apelin Endothelial Signaling Pathway	0	0.0261	NaN	MEF2D,MTOR,RELA
Apelin Liver Signaling Pathway	0.237	0.0385	NaN	GSK3A
Apelin Pancreas Signaling Pathway	0	0.0227	NaN	RELA
Apoptosis Signaling	1.36	0.0707	1.89	BAX,CAPN1,CAPN2,CAPNS1,CDK1,CYCS,RELA
April Mediated Signaling	0	0.0256	NaN	RELA
Arginine Biosynthesis IV	0.742	0.167	NaN	GLUD1
Arginine Degradation I (Arginase Pathway)	0.903	0.25	NaN	ARG1
Arginine Degradation VI (Arginase 2 Pathway)	0.742	0.167	NaN	ARG1
Arsenate Detoxification I (Glutaredoxin)	2.21	0.5	NaN	GSTO1,PNP
Aryl Hydrocarbon Receptor Signaling	8.79	0.154	0.378	ALDH16A1,ALDH18A1,ALDH1A1,ALDH1A3,ALDH1B1,ALDH2,ALDH3A1,ALDH3A2,ALDH3B1,BAX,GSTO1,GSTP1,HSP90B1,HSPB1,MCM7,MGST1,MGST3,NCOR2,NEDD8,NQO1,RELA,TGM2
Ascorbate Recycling (Cytosolic)	2.21	0.5	NaN	GLRX,GSTO1
Asparagine Biosynthesis I	1.48	1	NaN	ASNS
Aspartate Biosynthesis	1.02	0.333	NaN	GOT2
Aspartate Degradation II	1.69	0.286	NaN	GOT2,MDH1
Assembly of RNA Polymerase II Complex	0	0.02	NaN	TAF15
Atherosclerosis Signaling	0.921	0.0556	NaN	ALOX12B,ALOXE3,APOD,IL18,LYZ,RELA,S100A8
ATM Signaling	0	0.0309	NaN	BRCA1,CDK1,PPP2R1A
Autoimmune Thyroid Disease Signaling	0.666	0.0612	NaN	HLA-A,HLA-B,HLA-G
Autophagy	0	0.0164	NaN	MTOR
Axonal Guidance Signaling	1.76	0.0517	NaN	ACTR3,ARPC1B,ARPC4,CDC42,CDK5,EPHA2,EPHB1,GNB4,ITGA3,ITSN1,MYL6,PDIA3,PFN1,PFN2,RAC1,RHOA,TUBA1A,TUBA1C,TUBA4A,TUBB,TUBB2A,TUBB3,TUBB4A,TUBB4B,TUBB6
B Cell Activating Factor Signaling	0	0.0244	NaN	RELA
B Cell Development	0.48	0.0556	NaN	HLA-A,HLA-B
B Cell Receptor Signaling	0	0.027	1.342	CDC42,GSK3A,MTOR,RAC1,RELA
BAG2 Signaling Pathway	3.34	0.163	1.134	HSPA1A/HSPA1B,HSPA2,HSPA5,HSPA8,HSPA9,PSME2,RELA
Basal Cell Carcinoma Signaling	0.678	0.0556	2	APC,DVL1,DVL2,DVL3
BER pathway	1.24	0.167	NaN	APEX1,FEN1
BEX2 Signaling Pathway	0.318	0.038	NaN	MTOR,PPP2R1A,RELA
Bile Acid Biosynthesis, Neutral Pathway	1.18	0.154	NaN	AKR1C1/AKR1C2,AKR1C3
Biotin-carboxyl Carrier Protein Assembly	2.5	0.667	NaN	ACACA,ACACB
Bladder Cancer Signaling	0	0.0103	NaN	FGF2
BMP signaling pathway	0	0.0118	NaN	RELA
Branched-chain Î±-keto acid Dehydrogenase Complex	0.903	0.25	NaN	DLD
Breast Cancer Regulation by Stathmin1	0	0.0288	NaN	ANKHD1/ANKHD1-EIF4EBP3,CDK1,FGF2,GNB4,MTOR,PPP2R1A,RAC1,RHOA,TUBA1A,TUBA1C,TUBA4A,TUBB,TUBB2A,TUBB3,TUBB4A,TUBB4B,TUBB6
Calcium Signaling	0.629	0.0437	NaN	ACTA1,ASPH,ATP2A2,ATP2A3,HDAC2,HDAC3,HDAC7,MEF2D,MYL6
Calcium Transport I	2.45	0.3	NaN	ANXA5,ATP2A2,ATP2A3
Calcium-induced T Lymphocyte Apoptosis	2.24	0.106	2.449	ATP2A2,ATP2A3,CAPN2,HDAC2,HLA-A,HLA-B,MEF2D
cAMP-mediated signaling	0	0.00877	NaN	APEX1,GRK2
Cardiac Hypertrophy Signaling	0.78	0.0458	2.828	CDC42,GNB4,HSPB1,MEF2D,MTOR,MYL6,PDIA3,RAC1,RHOA,RHOC,RHOG
Cardiac Hypertrophy Signaling (Enhanced)	0.747	0.0411	2.683	APEX1,ATP2A2,ATP2A3,DVL1,DVL2,DVL3,FGF2,GSK3A,HDAC2,HDAC3,HDAC7,HSPB1,IL18,ITGA3,MEF2D,MTOR,PDIA3,RELA,RHOA,RPS6
Cardiac Î²-adrenergic Signaling	0.5	0.0426	1	APEX1,ATP2A2,ATP2A3,GNB4,GRK2,PPP2R1A
Caveolar-mediated Endocytosis Signaling	3.21	0.123	NaN	ACTA1,ACTB,FLOT2,HLA-A,HLA-B,ITGA3,ITGAV,ITSN1,RAB5C
CCR3 Signaling in Eosinophils	0	0.0242	NaN	GNB4,RAC1,RHOA
CCR5 Signaling in Macrophages	0	0.0106	NaN	GNB4
CD27 Signaling in Lymphocytes	0.282	0.0377	NaN	CYCS,RELA
CD28 Signaling in T Helper Cells	1.36	0.0667	2.449	ACTR3,ARPC1B,ARPC4,CDC42,HLA-A,HLA-B,RAC1,RELA
CD40 Signaling	0	0.0154	NaN	RELA
Cdc42 Signaling	1.31	0.0599	2.646	ACTR3,APC,ARPC1B,ARPC4,CDC42,HLA-A,HLA-B,HLA-G,ITGA3,MYL6
CDK5 Signaling	0.324	0.037	NaN	CAPN1,CDK5,ITGA3,PPP2R1A
CDP-diacylglycerol Biosynthesis I	0.313	0.05	NaN	MBOAT7
Cell Cycle Control of Chromosomal Replication	4.91	0.179	3.162	CDK1,CDK12,CDK13,CDK5,MCM3,MCM4,MCM5,MCM6,MCM7,TOP2A
Cell Cycle Regulation by BTG Family Proteins	0.465	0.0541	NaN	PPP2R1A,PRMT1
Cell Cycle: G1/S Checkpoint Regulation	0.752	0.0597	-1	HDAC2,HDAC3,HDAC7,RPL11
Cell Cycle: G2/M DNA Damage Checkpoint Regulation	4.58	0.184	1.134	BRCA1,CDK1,SFN,TOP2A,YWHAB,YWHAE,YWHAG,YWHAQ,YWHAZ
Cellular Effects of Sildenafil (Viagra)	0.368	0.0382	NaN	ACTA1,ACTB,MYL6,PABPC4,PDIA3
Ceramide Signaling	0.256	0.0341	NaN	CYCS,PPP2R1A,RELA
Chemokine Signaling	0	0.0125	NaN	RHOA
Cholecystokinin/Gastrin-mediated Signaling	1.02	0.0588	2.236	CDC42,IL18,MEF2D,RAC1,RHOA,RHOC,RHOG
Cholesterol Biosynthesis I	0.453	0.0769	NaN	DHCR7
Cholesterol Biosynthesis II (via 24,25-dihydrolanosterol)	0.453	0.0769	NaN	DHCR7
Cholesterol Biosynthesis III (via Desmosterol)	0.453	0.0769	NaN	DHCR7
Chondroitin Sulfate Degradation (Metazoa)	0.384	0.0625	NaN	OGA
Chronic Myeloid Leukemia Signaling	0.359	0.0388	NaN	HDAC2,HDAC3,HDAC7,RELA
Citrulline Biosynthesis	2.6	0.333	NaN	ALDH18A1,ARG1,GLS
Clathrin-mediated Endocytosis Signaling	9.67	0.14	NaN	AAK1,ACTA1,ACTB,ACTR3,AP1G1,AP1G2,AP2A1,AP2M1,AP3M1,APOD,ARF6,ARPC1B,ARPC4,CDC42,CLTC,CSNK2A1,F2,FGF2,HSPA8,LYZ,MYO6,RAB5C,RAB7A,RAC1,S100A8,TFRC,UBB
Cleavage and Polyadenylation of Pre-mRNA	0.481	0.0833	NaN	CPSF6
CNTF Signaling	0	0.0175	NaN	MTOR
Coagulation System	0.975	0.0857	NaN	F2,FGB,SERPINE1
Coenzyme A Biosynthesis	1.02	0.333	NaN	COASY
Colanic Acid Building Blocks Biosynthesis	1.12	0.143	NaN	GPI,UGP2
Colorectal Cancer Metastasis Signaling	0.678	0.0435	1.414	APC,BAX,CDC42,DVL1,GNB4,GRK2,RAC1,RELA,RHOA,RHOC,RHOG
Communication between Innate and Adaptive Immune Cells	0.413	0.0417	NaN	HLA-A,HLA-B,HLA-G,IL18
Corticotropin Releasing Hormone Signaling	0	0.0138	NaN	KRT1,MEF2D
CREB Signaling in Neurons	0	0.00966	NaN	GNB4,PDIA3
Crosstalk between Dendritic Cells and Natural Killer Cells	2.06	0.0899	NaN	ACTA1,ACTB,FSCN1,HLA-A,HLA-B,HLA-G,IL18,RELA
CTLA4 Signaling in Cytotoxic T Lymphocytes	2.06	0.0899	NaN	AP1G1,AP1G2,AP2A1,AP2M1,CLTC,HLA-A,HLA-B,PPP2R1A
CXCR4 Signaling	0.511	0.0419	2.236	CDC42,GNB4,MYL6,RAC1,RHOA,RHOC,RHOG
Cyclins and Cell Cycle Regulation	0.896	0.0617	NaN	CDK1,HDAC2,HDAC3,HDAC7,PPP2R1A
Cysteine Biosynthesis III (mammalia)	3.03	0.208	2.236	AHCY,AHCYL1,MAT2A,PRMT1,PRMT5
Cytotoxic T Lymphocyte-mediated Apoptosis of Target Cells	1	0.0882	NaN	CYCS,HLA-A,HLA-B
Death Receptor Signaling	1.53	0.0769	1.89	ACTA1,ACTB,CYCS,HSPB1,PARP12,PARP9,RELA
Dendritic Cell Maturation	0.254	0.0328	2.449	FSCN1,HLA-A,HLA-B,IL18,PDIA3,RELA
Dermatan Sulfate Degradation (Metazoa)	0.365	0.0588	NaN	OGA
D-myo-inositol (1,4,5,6)-Tetrakisphosphate Biosynthesis	0	0.0213	NaN	ATP1A1,NUDT5,PTPN12
D-myo-inositol (3,4,5,6)-tetrakisphosphate Biosynthesis	0	0.0213	NaN	ATP1A1,NUDT5,PTPN12
D-myo-inositol-5-phosphate Metabolism	0	0.0192	NaN	ATP1A1,NUDT5,PTPN12
DNA damage-induced 14-3-3Ïƒ Signaling	1.64	0.158	NaN	BRCA1,CDK1,SFN
DNA Double-Strand Break Repair by Homologous Recombination	0.428	0.0714	NaN	BRCA1
DNA Methylation and Transcriptional Repression Signaling	0	0.0286	NaN	HDAC2
Docosahexaenoic Acid (DHA) Signaling	0.896	0.0789	NaN	BAX,CYCS,GSK3A
Dopamine Degradation	4.38	0.233	2.646	ALDH1A1,ALDH1A3,ALDH1B1,ALDH2,ALDH3A1,ALDH3A2,ALDH3B1
Dopamine Receptor Signaling	0	0.013	NaN	PPP2R1A
Dopamine-DARPP32 Feedback in cAMP Signaling	0	0.0307	NaN	ATP2A2,ATP2A3,CDK5,PDIA3,PPP2R1A
dTMP De Novo Biosynthesis	0.815	0.2	NaN	SHMT2
EGF Signaling	0.266	0.0364	NaN	CSNK2A1,MTOR
Eicosanoid Signaling	0.434	0.0455	NaN	AKR1C3,ALOX12B,LTA4H
EIF2 Signaling	38	0.272	4.849	ACTA1,ACTB,EIF2AK2,EIF2S3,EIF3E,EIF3L,EIF4A1,EIF4A2,FAU,HSPA5,PABPC1,PTBP1,RPL10,RPL10A,RPL11,RPL12,RPL13,RPL14,RPL15,RPL17,RPL18,RPL18A,RPL22,RPL23,RPL23A,RPL26,RPL27,RPL27A,RPL28,RPL29,RPL3,RPL34,RPL38,RPL4,RPL6,RPL7,RPL7A,RPL8,RPLP0,RPS12,RPS14,RPS15A,RPS16,RPS18,RPS2,RPS21,RPS23,RPS24,RPS25,RPS26,RPS27,RPS29,RPS3,RPS4X,RPS5,RPS6,RPS7,RPS8,RPS9,RPSA,WARS1
Endocannabinoid Cancer Inhibition Pathway	0	0.014	NaN	MTOR,RHOA
Endocannabinoid Developing Neuron Pathway	0.281	0.0348	2	BRCA1,MTOR,RAC1,RHOA
Endocannabinoid Neuronal Synapse Pathway	0	0.00781	NaN	PDIA3
Endoplasmic Reticulum Stress Pathway	0.824	0.0952	NaN	HSP90B1,HSPA5
Endothelin-1 Signaling	0	0.00532	NaN	PDIA3
eNOS Signaling	0.376	0.0377	-2.236	HSP90B1,HSPA1A/HSPA1B,HSPA2,HSPA5,HSPA8,HSPA9
Ephrin A Signaling	1.17	0.0851	NaN	CDC42,EPHA2,RAC1,RHOA
Ephrin B Signaling	2.04	0.0972	1.633	CAP1,CDC42,EPHB1,GNB4,ITSN1,RAC1,RHOA
Ephrin Receptor Signaling	1.45	0.0611	3	ACTR3,ARPC1B,ARPC4,CDC42,EPHA2,EPHB1,GNB4,ITGA3,ITSN1,RAC1,RHOA
Epithelial Adherens Junction Signaling	9.01	0.151	NaN	ACTA1,ACTB,ACTN1,ACTN2,ACTN4,ACTR3,APC,ARPC1B,ARPC4,CDC42,MYL6,RAC1,RHOA,TUBA1A,TUBA1C,TUBA4A,TUBB,TUBB2A,TUBB3,TUBB4A,TUBB4B,TUBB6,YES1
ErbB Signaling	0	0.0213	NaN	CDC42,MTOR
ErbB2-ErbB3 Signaling	0	0.0154	NaN	GSK3A
ERK/MAPK Signaling	0.524	0.0415	1	HSPB1,ITGA3,PPP2R1A,RAC1,YWHAB,YWHAG,YWHAQ,YWHAZ
ERK5 Signaling	2.04	0.0972	2.646	MEF2D,SFN,YWHAB,YWHAE,YWHAG,YWHAQ,YWHAZ
Erythropoietin Signaling	0	0.0132	NaN	RELA
Estrogen Biosynthesis	0.824	0.0732	NaN	AKR1C3,HSD17B10,HSD17B4
Estrogen Receptor Signaling	0.91	0.0457	0.535	ATP5F1A,CYC1,GSK3A,HDAC3,HNRNPD,HSP90B1,MTOR,MYL6,NCOR1,NCOR2,PDIA3,RBFOX2,RELA,RHOA,UQCRC2
Estrogen-Dependent Breast Cancer Signaling	0.358	0.0405	NaN	HSD17B10,HSD17B4,RELA
Estrogen-mediated S-phase Entry	0.237	0.0385	NaN	CDK1
Ethanol Degradation II	4.19	0.219	2.646	ALDH1A1,ALDH1A3,ALDH1B1,ALDH2,ALDH3A1,ALDH3A2,ALDH3B1
Ethanol Degradation IV	6.39	0.348	2.828	ALDH1A1,ALDH1A3,ALDH1B1,ALDH2,ALDH3A1,ALDH3A2,ALDH3B1,CAT
Eumelanin Biosynthesis	2	0.4	NaN	DDT,MIF
Extrinsic Prothrombin Activation Pathway	1.02	0.125	NaN	F2,FGB
Factors Promoting Cardiogenesis in Vertebrates	0	0.0267	1	APC,DVL1,PDIA3,RHOA
FAK Signaling	1.44	0.0737	NaN	ACTA1,ACTB,CAPN1,CAPN2,CAPNS1,ITGA3,RAC1
FAT10 Cancer Signaling Pathway	0.349	0.0435	NaN	EEF1A1,RELA
FAT10 Signaling Pathway	0.936	0.111	NaN	NUB1,PSME2
Fatty Acid Activation	1.18	0.154	NaN	ACSL3,SLC27A2
Fatty Acid Î±-oxidation	8.3	0.45	3	ALDH1A1,ALDH1A3,ALDH1B1,ALDH2,ALDH3A1,ALDH3A2,ALDH3B1,ALOX12B,ALOXE3
Fatty Acid Î²-oxidation I	4.19	0.219	2.646	ACADM,ACSL3,HADHA,HADHB,HSD17B10,HSD17B4,SLC27A2
Fc Epsilon RI Signaling	0	0.00855	NaN	RAC1
FcÎ³ Receptor-mediated Phagocytosis in Macrophages and Monocytes	2.99	0.106	3.162	ACTA1,ACTB,ACTR3,ARF6,ARPC1B,ARPC4,CDC42,EZR,RAC1,YES1
FGF Signaling	0	0.0238	NaN	FGF2,RAC1
FLT3 Signaling in Hematopoietic Progenitor Cells	0	0.0125	NaN	MTOR
fMLP Signaling in Neutrophils	1.06	0.0603	2.449	ACTR3,ARPC1B,ARPC4,CDC42,GNB4,RAC1,RELA
Folate Polyglutamylation	2	0.4	NaN	MTHFD1,SHMT2
Folate Transformations I	1.48	0.222	NaN	MTHFD1,SHMT2
FXR/RXR Activation	0	0.0159	NaN	APOD,IL18
G Beta Gamma Signaling	0	0.0164	NaN	CDC42,GNB4
G Protein Signaling Mediated by Tubby	0	0.0323	NaN	GNB4
GABA Receptor Signaling	0.423	0.0421	NaN	AP1G2,AP2A1,AP2M1,UBB
GADD45 Signaling	0.896	0.105	NaN	BRCA1,CDK1
Gap Junction Signaling	1.52	0.0606	NaN	ACTA1,ACTB,PDIA3,TUBA1A,TUBA1C,TUBA4A,TUBB,TUBB2A,TUBB3,TUBB4A,TUBB4B,TUBB6
GDNF Family Ligand-Receptor Interactions	0	0.0263	NaN	CDC42,RAC1
GDP-glucose Biosynthesis	2.32	0.273	NaN	HK1,HKDC1,PGM1
GDP-mannose Biosynthesis	0.742	0.167	NaN	GPI
Germ Cell-Sertoli Cell Junction Signaling	6.05	0.117	NaN	ACTA1,ACTB,ACTN1,ACTN2,ACTN4,CDC42,ITGA3,RAC1,RHOA,RHOC,RHOG,TUBA1A,TUBA1C,TUBA4A,TUBB,TUBB2A,TUBB3,TUBB4A,TUBB4B,TUBB6
GÎ±12/13 Signaling	0.595	0.0462	2.449	CDC42,F2,MEF2D,MYL6,RELA,RHOA
GÎ±i Signaling	0	0.008	NaN	GNB4
GÎ±q Signaling	0.83	0.0506	1.342	CDC42,GNB4,GRK2,RAC1,RELA,RHOA,RHOC,RHOG
GÎ±s Signaling	0	0.00935	NaN	GNB4
Glioblastoma Multiforme Signaling	0.757	0.0485	2.121	APC,CDC42,MTOR,PDIA3,RAC1,RHOA,RHOC,RHOG
Glioma Invasiveness Signaling	1.46	0.0811	2	CDC42,ITGAV,RAC1,RHOA,RHOC,RHOG
Glioma Signaling	0	0.0182	NaN	IDH1,MTOR
Glucocorticoid Receptor Signaling	7.64	0.0982	NaN	ACTB,FKBP4,HSP90B1,HSPA1A/HSPA1B,HSPA2,HSPA5,HSPA8,HSPA9,KRT1,KRT10,KRT14,KRT15,KRT16,KRT17,KRT19,KRT2,KRT27,KRT4,KRT5,KRT6A,KRT6B,KRT71,KRT73,KRT77,KRT8,KRT9,NCOR1,NCOR2,RAC1,RELA,SERPINE1,SMARCE1,TAF15
Gluconeogenesis I	9.67	0.423	3.317	ALDOA,ALDOC,ENO1,ENO2,ENO3,GAPDH,GAPDHS,GPI,MDH1,ME1,PGK1
Glucose and Glucose-1-phosphate Degradation	2.21	0.25	NaN	HK1,HKDC1,PGM1
Glutamate Biosynthesis II	1.19	0.5	NaN	GLUD1
Glutamate Degradation II	1.02	0.333	NaN	GOT2
Glutamate Degradation X	1.19	0.5	NaN	GLUD1
Glutamate Receptor Signaling	0	0.0175	NaN	GLS
Glutamate Removal from Folates	1.48	1	NaN	GGH
Glutamine Degradation I	1.19	0.5	NaN	GLS
Glutaryl-CoA Degradation	3.92	0.312	2.236	HADHA,HADHB,HSD17B10,HSD17B4,PARK7
Glutathione Biosynthesis	1.02	0.333	NaN	GSS
Glutathione Redox Reactions I	2.14	0.167	2	GSR,GSTP1,MGST1,MGST3
Glutathione Redox Reactions II	3.86	0.75	NaN	GLRX,GSR,PDIA3
Glutathione-mediated Detoxification	2.44	0.156	2.236	GGH,GSTO1,GSTP1,MGST1,MGST3
Glycerol Degradation I	0.742	0.167	NaN	GPD2
Glycerol-3-phosphate Shuttle	1.02	0.333	NaN	GPD2
Glycine Betaine Degradation	0.548	0.1	NaN	SHMT2
Glycine Biosynthesis I	1.19	0.5	NaN	SHMT2
Glycine Cleavage Complex	0.742	0.167	NaN	DLD
Glycogen Biosynthesis II (from UDP-D-Glucose)	0.682	0.143	NaN	UGP2
Glycogen Degradation II	0.481	0.0833	NaN	PGM1
Glycogen Degradation III	0.428	0.0714	NaN	PGM1
Glycolysis I	9.67	0.423	3.317	ALDOA,ALDOC,ENO1,ENO2,ENO3,GAPDH,GAPDHS,GPI,PGK1,PKM,TPI1
GM-CSF Signaling	0	0.0143	NaN	RACK1
GNRH Signaling	0	0.0173	NaN	CDC42,RAC1,RELA
GP6 Signaling Pathway	0.26	0.0336	1	FGB,GSK3A,RAC1,RHOG
GPCR-Mediated Integration of Enteroendocrine Signaling Exemplified by an L Cell	0	0.0137	NaN	PDIA3
GPCR-Mediated Nutrient Sensing in Enteroendocrine Cells	0	0.00893	NaN	PDIA3
G-Protein Coupled Receptor Signaling	0	0.011	NaN	APEX1,GRK2,RELA
Graft-versus-Host Disease Signaling	1.14	0.0833	NaN	HLA-A,HLA-B,HLA-G,IL18
Granulocyte Adhesion and Diapedesis	0	0.0278	NaN	EZR,IL18,ITGA3,MSN,RDX
Granzyme A Signaling	7.15	0.421	NaN	APEX1,H1-0,H1-1,H1-10,H1-2,H1-4,H1-5,NME1
Granzyme B Signaling	0.384	0.0625	NaN	CYCS
Guanine and Guanosine Salvage I	2.97	1	NaN	HPRT1,PNP
Guanosine Nucleotides Degradation III	1.24	0.167	NaN	NT5C3A,PNP
Gustation Pathway	0	0.00649	NaN	APEX1
Heme Degradation	2.21	0.5	NaN	BLVRA,BLVRB
Hepatic Cholestasis	0	0.0108	NaN	IL18,RELA
Hepatic Fibrosis / Hepatic Stellate Cell Activation	0	0.0323	NaN	BAX,FGF2,FN1,MYL6,RELA,SERPINE1
Hepatic Fibrosis Signaling Pathway	1.22	0.0489	4.243	CDC42,DVL1,DVL2,DVL3,FGF2,FTH1,FTL,IL18,ITGA3,MTOR,MYL6,RAC1,RELA,RHOA,RHOC,RHOG,SERPINE1,TFRC
HER-2 Signaling in Breast Cancer	0	0.0238	NaN	CDC42,GSK3A
Hereditary Breast Cancer Signaling	1.77	0.0714	NaN	ACTB,BRCA1,CDK1,HDAC2,HDAC3,HDAC7,RFC1,SFN,SMARCE1,UBB
HGF Signaling	0	0.027	NaN	CDC42,ITGA3,RAC1
HIF1Î± Signaling	0.293	0.0354	NaN	APEX1,LDHA,LDHB,SLC2A1
HIPPO signaling	1.67	0.0824	-2.646	PPP2R1A,SFN,YWHAB,YWHAE,YWHAG,YWHAQ,YWHAZ
Histamine Degradation	6.24	0.412	2.646	ALDH1A1,ALDH1A3,ALDH1B1,ALDH2,ALDH3A1,ALDH3A2,ALDH3B1
Histidine Degradation III	1.58	0.25	NaN	HAL,MTHFD1
Histidine Degradation VI	0.406	0.0667	NaN	HAL
HMGB1 Signaling	1.03	0.0545	2.828	CDC42,HAT1,IL18,RAC1,RELA,RHOA,RHOC,RHOG,SERPINE1
HOTAIR Regulatory Pathway	0	0.0312	1.342	ELAVL1,HDAC2,KDM1A,RELA,RHOC
Human Embryonic Stem Cell Pluripotency	0	0.0296	NaN	APC,DVL1,FGF2,GSK3A
Huntington's Disease Signaling	6.52	0.105	1	ATP5F1A,ATP5F1B,BAX,CAPN1,CAPN2,CAPNS1,CDK5,CLTC,CYCS,GLS,GNB4,HDAC2,HDAC3,HDAC7,HSPA1A/HSPA1B,HSPA2,HSPA5,HSPA8,HSPA9,MTOR,NCOR1,NCOR2,PSME2,TGM2,UBB
Hypoxia Signaling in the Cardiovascular System	1.02	0.0676	NaN	HSP90B1,LDHA,NQO1,P4HB,UBE2D3
Î±-Adrenergic Signaling	0	0.0104	NaN	GNB4
Î³-glutamyl Cycle	1.31	0.182	NaN	GGCT,GSS
Î³-linolenate Biosynthesis II (Animals)	0.979	0.118	NaN	ACSL3,SLC27A2
iCOS-iCOSL Signaling in T Helper Cells	0.305	0.036	2	HLA-A,HLA-B,RAC1,RELA
IGF-1 Signaling	1.26	0.0673	NaN	CSNK2A1,SFN,YWHAB,YWHAE,YWHAG,YWHAQ,YWHAZ
IL-1 Signaling	0.458	0.044	NaN	GNB4,RELA,TAB2,TOLLIP
IL-10 Signaling	0.721	0.058	NaN	BLVRA,BLVRB,IL18,RELA
IL-12 Signaling and Production in Macrophages	0.577	0.0455	NaN	APOD,IL18,LYZ,RAB7A,RELA,S100A8
IL-15 Production	0.249	0.0331	2	EPHA2,EPHB1,RELA,YES1
IL-15 Signaling	0	0.0267	NaN	MTOR,RELA
IL-17 Signaling	0	0.025	NaN	MUC5B,RELA
IL-17A Signaling in Airway Cells	0.445	0.0462	NaN	MUC5AC,MUC5B,RELA
IL-17A Signaling in Fibroblasts	0	0.0286	NaN	RELA
IL-17A Signaling in Gastric Cells	0.248	0.04	NaN	RELA
IL-2 Signaling	0	0.0164	NaN	CSNK2A1
IL-23 Signaling Pathway	0	0.0227	NaN	RELA
IL-3 Signaling	0	0.0127	NaN	RAC1
IL-4 Signaling	0.276	0.0353	NaN	HLA-A,HLA-B,MTOR
IL-6 Signaling	0	0.032	1	CSNK2A1,HSPB1,IL18,RELA
IL-7 Signaling Pathway	0.325	0.0385	NaN	BAX,GSK3A,SLC2A1
IL-8 Signaling	1.18	0.055	2.333	BAX,CDC42,CSTB,GNB4,ITGAV,MTOR,RAC1,RELA,RHOA,RHOC,RHOG
IL-9 Signaling	0	0.0303	NaN	RELA
ILK Signaling	4.25	0.0947	3.357	ACTA1,ACTB,ACTN1,ACTN2,ACTN4,CDC42,DSP,FERMT2,FN1,GSK3A,MTOR,MYL6,PPP2R1A,RAC1,RELA,RHOA,RHOC,RHOG
Induction of Apoptosis by HIV1	1.84	0.0984	2.449	BAX,CYCS,RELA,SLC25A13,SLC25A5,SLC25A6
Inflammasome pathway	0.313	0.05	NaN	IL18
Inhibition of Angiogenesis by TSP1	0	0.0294	NaN	HSPG2
Inhibition of ARE-Mediated mRNA Degradation Pathway	1.32	0.0656	2.121	PPP2R1A,PSME2,SFN,YWHAB,YWHAE,YWHAG,YWHAQ,YWHAZ
Inhibition of Matrix Metalloproteases	0	0.0256	NaN	HSPG2
iNOS Signaling	0	0.0222	NaN	RELA
Inosine-5'-phosphate Biosynthesis II	1.02	0.333	NaN	ATIC
Insulin Receptor Signaling	0	0.0143	NaN	GSK3A,MTOR
Integrin Signaling	6.82	0.113	3.266	ACTA1,ACTB,ACTN1,ACTN2,ACTN4,ACTR3,ARF3,ARF4,ARF5,ARF6,ARPC1B,ARPC4,CAPN1,CAPN2,CAPNS1,CDC42,ITGA3,ITGAV,PFN1,PFN2,RAC1,RHOA,RHOC,RHOG
Interferon Signaling	2.99	0.167	1.633	BAX,IFIT1,ISG15,MX1,RELA,TAP1
Intrinsic Prothrombin Activation Pathway	0.396	0.0476	NaN	F2,FGB
Iron homeostasis signaling pathway	1.09	0.0584	NaN	ACO1,ACO2,FTH1,FTL,HBB,HP,HSPA9,TFRC
Isoleucine Degradation I	2.93	0.267	2	DLD,HADHA,HADHB,HSD17B10
JAK/Stat Signaling	0	0.025	NaN	MTOR,RELA
Ketogenesis	1.31	0.182	NaN	HADHA,HADHB
Ketolysis	1.39	0.2	NaN	HADHA,HADHB
L-cysteine Degradation I	0.903	0.25	NaN	GOT2
Leptin Signaling in Obesity	0	0.0135	NaN	PDIA3
Leucine Degradation I	1.48	0.222	NaN	ACADM,MCCC1
Leukocyte Extravasation Signaling	1.88	0.066	3.606	ACTA1,ACTB,ACTN1,ACTN2,ACTN4,CDC42,EZR,ITGA3,MSN,MYL6,RAC1,RDX,RHOA
Leukotriene Biosynthesis	1.18	0.154	NaN	LTA4H,MGST3
Lipid Antigen Presentation by CD1	2.86	0.192	NaN	AP1G2,AP2A1,AP2M1,ARF6,PDIA3
LPS/IL-1 Mediated Inhibition of RXR Function	3.35	0.0804	NaN	ACSL3,ALDH16A1,ALDH18A1,ALDH1A1,ALDH1A3,ALDH1B1,ALDH2,ALDH3A1,ALDH3A2,ALDH3B1,CAT,GSTO1,GSTP1,IL18,MGST1,MGST3,SLC27A2,XPO1
LPS-stimulated MAPK Signaling	0.296	0.0366	NaN	CDC42,RAC1,RELA
LXR/RXR Activation	1.34	0.0661	-1.342	ACACA,APOD,IL18,LYZ,NCOR1,NCOR2,RELA,S100A8
Lymphotoxin Î² Receptor Signaling	0.282	0.0377	NaN	CYCS,RELA
Macropinocytosis Signaling	0.983	0.0658	NaN	ACTN4,ARF6,CDC42,RAC1,RHOA
Maturity Onset Diabetes of Young (MODY) Signaling	0.298	0.0476	NaN	GAPDH
Mechanisms of Viral Exit from Host Cells	1.35	0.0976	NaN	ACTA1,ACTB,CHMP2B,XPO1
Melatonin Signaling	0	0.0139	NaN	PDIA3
Methionine Degradation I (to Homocysteine)	3.21	0.227	2.236	AHCY,AHCYL1,MAT2A,PRMT1,PRMT5
Methylglyoxal Degradation III	2.62	0.222	2	AKR1B1,AKR1B10,AKR1C1/AKR1C2,AKR1C3
Methylmalonyl Pathway	0.903	0.25	NaN	PCCA
Mevalonate Pathway I	1.12	0.143	NaN	HADHA,HADHB
MIF Regulation of Innate Immunity	0.396	0.0476	NaN	MIF,RELA
MIF-mediated Glucocorticoid Regulation	0.513	0.0588	NaN	MIF,RELA
Mismatch Repair in Eukaryotes	1.02	0.125	NaN	FEN1,RFC1
Mitochondrial Dysfunction	6.68	0.123	NaN	ACO1,ACO2,ATP5F1A,ATP5F1B,ATP5MF,ATP5PO,CAT,CYC1,CYCS,GPD2,GSR,HSD17B10,PARK7,PRDX3,PRDX5,UQCR10,UQCRC1,UQCRC2,VDAC1,VDAC2,VDAC3
Mitochondrial L-carnitine Shuttle Pathway	0.979	0.118	NaN	ACSL3,SLC27A2
Mitotic Roles of Polo-Like Kinase	1.68	0.0909	NaN	CAPN1,CDK1,HSP90B1,PPP2R1A,PRC1,SLK
Molecular Mechanisms of Cancer	1.24	0.0486	NaN	APC,BAX,BRCA1,CDC42,CDK1,CDK12,CDK13,CDK5,CYCS,DVL1,GSK3A,HAT1,ITGA3,RAC1,RELA,RHOA,RHOC,RHOG,TAB2
Mouse Embryonic Stem Cell Pluripotency	0.359	0.0388	2	APC,DVL1,DVL2,DVL3
MSP-RON Signaling Pathway	0.243	0.0345	NaN	ACTA1,ACTB
mTOR Signaling	13.1	0.157	1.89	CDC42,EIF3E,EIF3L,EIF4A1,EIF4A2,FAU,MTOR,PPP2R1A,RAC1,RHOA,RHOC,RHOG,RPS12,RPS14,RPS15A,RPS16,RPS18,RPS2,RPS21,RPS23,RPS24,RPS25,RPS26,RPS27,RPS29,RPS3,RPS4X,RPS5,RPS6,RPS7,RPS8,RPS9,RPSA
Myc Mediated Apoptosis Signaling	0.309	0.04	NaN	BAX,CYCS
N-acetylglucosamine Degradation I	1.02	0.333	NaN	GNPDA1
N-acetylglucosamine Degradation II	0.903	0.25	NaN	GNPDA1
NAD biosynthesis II (from tryptophan)	0.481	0.0833	NaN	KYNU
NAD Biosynthesis III	0.742	0.167	NaN	NAMPT
NAD Salvage Pathway II	0.237	0.0385	NaN	NT5C3A
NADH Repair	1.02	0.333	NaN	GAPDH
Natural Killer Cell Signaling	1.88	0.066	1.941	CDC42,HLA-A,HLA-B,HLA-G,HSPA1A/HSPA1B,HSPA2,HSPA5,HSPA8,HSPA9,IL18,MTOR,RAC1,RELA
Necroptosis Signaling Pathway	3.68	0.0955	3.357	CAPN1,CAPN2,CAPNS1,EIF2AK2,GLUD1,PPIF,SLC25A13,SLC25A5,SLC25A6,TAB2,TOMM40,TOMM70,VDAC1,VDAC2,VDAC3
NER Pathway	0.604	0.0485	NaN	DDB1,NEDD8,RAD23B,RFC1,TOP2A
Netrin Signaling	0	0.0154	NaN	RAC1
Neuregulin Signaling	0.684	0.0521	NaN	CDK5,HSP90B1,ITGA3,MTOR,RPS6
Neuroinflammation Signaling Pathway	0	0.02	1.342	GLS,HLA-A,HLA-B,IDE,IL18,RELA
Neuropathic Pain Signaling In Dorsal Horn Neurons	0	0.0099	NaN	PDIA3
Neuroprotective Role of THOP1 in Alzheimer's Disease	1.05	0.0598	NaN	HLA-A,HLA-B,HLA-G,IDE,LONP1,PRSS3,YWHAE
Neurotrophin/TRK Signaling	0	0.0132	NaN	CDC42
NF-ÎºB Activation by Viruses	0.55	0.0488	2	EIF2AK2,ITGA3,ITGAV,RELA
NF-ÎºB Signaling	0.272	0.0335	1.633	CSNK2A1,EIF2AK2,HDAC2,IL18,RELA,TAB2
NGF Signaling	0.767	0.0526	2.449	BAX,CDC42,RAC1,RELA,RHOA,RHOG
Nitric Oxide Signaling in the Cardiovascular System	0	0.0303	NaN	ATP2A2,ATP2A3,HSP90B1
nNOS Signaling in Neurons	0.701	0.0638	NaN	CAPN1,CAPN2,CAPNS1
Noradrenaline and Adrenaline Degradation	3.92	0.2	2.646	ALDH1A1,ALDH1A3,ALDH1B1,ALDH2,ALDH3A1,ALDH3A2,ALDH3B1
NRF2-mediated Oxidative Stress Response	5.95	0.111	3.464	ACTA1,ACTB,CAT,CBR1,CCT7,DNAJA1,DNAJC7,EPHX1,FTH1,FTL,GSR,GSTO1,GSTP1,HACD3,MGST1,MGST3,NQO1,PPIB,STIP1,UBB,VCP
Nucleotide Excision Repair Pathway	0	0.0286	NaN	RAD23B
Nur77 Signaling in T Lymphocytes	1.36	0.0847	NaN	CYCS,HDAC2,HLA-A,HLA-B,MEF2D
Opioid Signaling Pathway	0	0.0324	1.414	AP1G2,AP2A1,AP2M1,CDC42,CLTC,GRK2,RAC1,YES1
Osteoarthritis Pathway	1.06	0.0521	2.646	ANXA5,FGF2,FN1,HDAC3,ITGA3,MTOR,NAMPT,RAC1,RELA,S100A8,S100A9
Ovarian Cancer Signaling	0	0.0288	NaN	APC,BRCA1,DVL1,MTOR
OX40 Signaling Pathway	0.467	0.0444	NaN	HLA-A,HLA-B,HLA-G,RELA
Oxidative Ethanol Degradation III	5.85	0.368	2.646	ALDH1A1,ALDH1A3,ALDH1B1,ALDH2,ALDH3A1,ALDH3A2,ALDH3B1
Oxidative Phosphorylation	2.02	0.0826	3	ATP5F1A,ATP5F1B,ATP5MF,ATP5PO,CYC1,CYCS,UQCR10,UQCRC1,UQCRC2
P2Y Purigenic Receptor Signaling Pathway	0	0.0236	NaN	GNB4,PDIA3,RELA
p38 MAPK Signaling	0.265	0.0339	2	HSPB1,IL18,MEF2D,TAB2
p53 Signaling	0.397	0.0408	NaN	BAX,BRCA1,SFN,ST13
p70S6K Signaling	2.46	0.0853	1.342	F2,MTOR,PDIA3,PPP2R1A,RPS6,SFN,YWHAB,YWHAE,YWHAG,YWHAQ,YWHAZ
PAK Signaling	0.406	0.0412	2	CDC42,ITGA3,MYL6,RAC1
Pancreatic Adenocarcinoma Signaling	0	0.0275	NaN	CDC42,RAC1,RELA
Parkinson's Signaling	1.84	0.188	NaN	CYCS,PARK7,UCHL1
Paxillin Signaling	3.08	0.102	2.53	ACTA1,ACTB,ACTN1,ACTN2,ACTN4,ARF6,CDC42,ITGA3,ITGAV,PTPN12,RAC1
PCP pathway	2.47	0.117	2.646	DVL1,DVL2,DVL3,PFN1,PFN2,RAC1,RHOA
PD-1, PD-L1 cancer immunotherapy pathway	0.338	0.0377	-2	CSNK2A1,HLA-A,HLA-B,HLA-G
PDGF Signaling	0	0.0233	NaN	CSNK2A1,EIF2AK2
PEDF Signaling	0.296	0.0366	NaN	RAC1,RELA,RHOA
Pentose Phosphate Pathway	2.45	0.3	NaN	PGD,RPIA,TKT
Pentose Phosphate Pathway (Non-oxidative Branch)	1.83	0.333	NaN	RPIA,TKT
Pentose Phosphate Pathway (Oxidative Branch)	0.903	0.25	NaN	PGD
PFKFB4 Signaling Pathway	1.2	0.087	1	FGF2,GPI,HK1,TKT
Phagosome Formation	1.27	0.064	NaN	CDC42,FN1,ITGA3,PDIA3,RAC1,RHOA,RHOC,RHOG
Phagosome Maturation	6.26	0.126	NaN	DYNLL1,HLA-A,HLA-B,M6PR,PRDX2,PRDX5,RAB5C,RAB7A,TAP1,TUBA1A,TUBA1C,TUBA4A,TUBA4B,TUBB,TUBB2A,TUBB3,TUBB4A,TUBB4B,TUBB6
Phenylalanine Degradation IV (Mammalian, via Side Chain)	3.06	0.286	2	ALDH2,ALDH3A2,GOT2,SLC27A2
Phenylethylamine Degradation I	2.21	0.5	NaN	ALDH2,ALDH3A2
Phosphatidylglycerol Biosynthesis II (Non-plastidic)	0.284	0.0455	NaN	MBOAT7
Phospholipase C Signaling	1.35	0.0545	2.887	CDC42,GNB4,HDAC2,HDAC3,HDAC7,ITGA3,MEF2D,MYL6,RAC1,RELA,RHOA,RHOC,RHOG,TGM2
Phospholipases	0	0.0159	NaN	PDIA3
PI3K Signaling in B Lymphocytes	0	0.0217	NaN	PDIA3,RAC1,RELA
PI3K/AKT Signaling	1.89	0.0686	1.732	GSK3A,HSP90B1,ITGA3,MTOR,PPP2R1A,RELA,SFN,YWHAB,YWHAE,YWHAG,YWHAQ,YWHAZ
PKCÎ¸ Signaling in T Lymphocytes	0	0.0258	2	HLA-A,HLA-B,RAC1,RELA
Polyamine Regulation in Colon Cancer	0.793	0.0909	NaN	APC,PSME2
PPAR Signaling	0.593	0.0481	-2.236	HSP90B1,IL18,NCOR1,NCOR2,RELA
PPARÎ±/RXRÎ± Activation	0.545	0.0421	-1.633	CAND1,GOT2,GPD2,HSP90B1,NCOR1,NCOR2,PDIA3,RELA
Primary Immunodeficiency Signaling	0.309	0.04	NaN	TAP1,TAP2
Production of Nitric Oxide and Reactive Oxygen Species in Macrophages	1.34	0.0585	1.897	APOD,CAT,CDC42,LYZ,PPP2R1A,RAC1,RELA,RHOA,RHOC,RHOG,S100A8
Proline Biosynthesis I	0.903	0.25	NaN	ALDH18A1
Prostate Cancer Signaling	0.458	0.044	NaN	GSTP1,HSP90B1,MTOR,RELA
Protein Kinase A Signaling	1.91	0.0553	2.828	APEX1,GNB4,GSK3A,H1-0,H1-1,H1-10,H1-2,H1-4,H1-5,KDELR1,MYL6,PDIA3,PTPN12,PTPN14,RELA,RHOA,SFN,YWHAB,YWHAE,YWHAG,YWHAQ,YWHAZ
Protein Ubiquitination Pathway	9.94	0.121	NaN	BRCA1,DNAJA1,DNAJC7,HLA-A,HLA-B,HSP90B1,HSPA1A/HSPA1B,HSPA2,HSPA5,HSPA8,HSPA9,HSPB1,HSPD1,PSMA1,PSMA2,PSMA4,PSMA6,PSMA7,PSMB1,PSMB2,PSMB5,PSMC1,PSMC6,PSMD11,PSMD13,PSMD2,PSMD3,PSME2,TAP1,TAP2,UBB,UBE2D3,UCHL1
PTEN Signaling	0.635	0.0476	-1.633	CDC42,CSNK2A1,GSK3A,ITGA3,RAC1,RELA
Purine Nucleotides De Novo Biosynthesis II	2.32	0.273	NaN	ATIC,GART,IMPDH2
Purine Nucleotides Degradation II (Aerobic)	1.7	0.167	NaN	IMPDH2,NT5C3A,PNP
Purine Ribonucleosides Degradation to Ribose-1-phosphate	0.682	0.143	NaN	PNP
Putrescine Degradation III	5.51	0.333	2.646	ALDH1A1,ALDH1A3,ALDH1B1,ALDH2,ALDH3A1,ALDH3A2,ALDH3B1
PXR/RXR Activation	0.445	0.0462	NaN	ALDH1A1,ALDH3A2,RELA
Pyridoxal 5'-phosphate Salvage Pathway	0.445	0.0462	NaN	CDK1,CDK5,EIF2AK2
Pyrimidine Deoxyribonucleotides De Novo Biosynthesis I	1.47	0.136	NaN	DTYMK,NME1,NME2
Pyrimidine Ribonucleotides De Novo Biosynthesis	1.29	0.093	2	NME1,NME2,NUDT5,UMPS
Pyrimidine Ribonucleotides Interconversion	0.824	0.0732	NaN	NME1,NME2,NUDT5
Pyruvate Fermentation to Lactate	1.83	0.333	NaN	LDHA,LDHB
Rac Signaling	1.51	0.0714	2.828	ACTR3,ARPC1B,ARPC4,CDC42,ITGA3,RAC1,RELA,RHOA
RAN Signaling	2.71	0.235	2	IPO5,KPNB1,RAN,XPO1
RANK Signaling in Osteoclasts	0	0.0227	NaN	RELA,TAB2
RAR Activation	2.72	0.0773	NaN	ACTB,AKR1B1,AKR1B10,AKR1C3,ALDH1A1,ALDH1A3,CSNK2A1,NCOR1,NCOR2,PRMT1,RAC1,RELA,RPL7A,SMARCE1,TRIM24
Reelin Signaling in Neurons	2	0.0775	2.53	ACTR3,ARPC1B,ARPC4,CDC42,CDK5,ITGA3,MTOR,RAC1,RHOA,YES1
Regulation of Actin-based Motility by Rho	5.65	0.149	3.742	ACTA1,ACTB,ACTR3,ARPC1B,ARPC4,CDC42,ITGA3,MYL6,PFN1,PFN2,RAC1,RHOA,RHOC,RHOG
Regulation of Cellular Mechanics by Calpain Protease	3.59	0.138	1.342	ACTN1,ACTN2,ACTN4,CAPN1,CAPN2,CAPNS1,CDK1,EZR,ITGA3
Regulation of eIF4 and p70S6K Signaling	15.2	0.197	1	EIF2S3,EIF3E,EIF3L,EIF4A1,EIF4A2,FAU,ITGA3,MTOR,PABPC1,PPP2R1A,RPS12,RPS14,RPS15A,RPS16,RPS18,RPS2,RPS21,RPS23,RPS24,RPS25,RPS26,RPS27,RPS29,RPS3,RPS4X,RPS5,RPS6,RPS7,RPS8,RPS9,RPSA
Regulation of IL-2 Expression in Activated and Anergic T Lymphocytes	0	0.0225	NaN	RAC1,RELA
Regulation of the Epithelial-Mesenchymal Transition Pathway	0.356	0.0365	NaN	APC,DVL1,DVL2,DVL3,FGF2,RELA,RHOA
Relaxin Signaling	0	0.02	NaN	APEX1,GNB4,RELA
Remodeling of Epithelial Adherens Junctions	15.8	0.324	2.646	ACTA1,ACTB,ACTN1,ACTN2,ACTN4,ACTR3,APC,ARF6,ARPC1B,ARPC4,NME1,RAB5C,RAB7A,TUBA1A,TUBA1C,TUBA4A,TUBB,TUBB2A,TUBB3,TUBB4A,TUBB4B,TUBB6
Renal Cell Carcinoma Signaling	0.573	0.05	NaN	CDC42,RAC1,SLC2A1,UBB
Renin-Angiotensin Signaling	0	0.0169	NaN	RAC1,RELA
Retinoate Biosynthesis I	2.33	0.147	2	AKR1B1,AKR1B10,AKR1C3,ALDH1A1,ALDH1A3
Retinoic acid Mediated Apoptosis Signaling	0.503	0.05	NaN	CYCS,PARP12,PARP9
Retinol Biosynthesis	0.801	0.0714	NaN	AKR1B10,AKR1C3,CES1
RhoA Signaling	3.69	0.106	3.464	ACTA1,ACTB,ACTR3,ANLN,ARPC1B,ARPC4,EZR,MSN,MYL6,PFN1,PFN2,RDX,RHOA
RhoGDI Signaling	3.52	0.0889	-3.873	ACTA1,ACTB,ACTR3,ARPC1B,ARPC4,CDC42,EZR,GNB4,ITGA3,MSN,MYL6,RAC1,RDX,RHOA,RHOC,RHOG
Role of BRCA1 in DNA Damage Response	0.573	0.05	NaN	ACTB,BRCA1,RFC1,SMARCE1
Role of CHK Proteins in Cell Cycle Checkpoint Control	0.936	0.0702	NaN	BRCA1,CDK1,PPP2R1A,RFC1
Role of Cytokines in Mediating Communication between Immune Cells	0	0.0185	NaN	IL18
Role of Hypercytokinemia/hyperchemokinemia in the Pathogenesis of Influenza	0	0.0233	NaN	IL18
Role of IL-17A in Arthritis	0	0.0182	NaN	RELA
Role of IL-17A in Psoriasis	2.11	0.231	NaN	S100A7,S100A8,S100A9
Role of IL-17F in Allergic Inflammatory Airway Diseases	0	0.0238	NaN	RELA
Role of JAK1, JAK2 and TYK2 in Interferon Signaling	0.259	0.0417	NaN	RELA
Role of Macrophages, Fibroblasts and Endothelial Cells in Rheumatoid Arthritis	0.352	0.0353	NaN	APC,DVL1,FGF2,FN1,IL18,MIF,PDIA3,PRSS3,RAC1,RELA,RHOA
Role of MAPK Signaling in the Pathogenesis of Influenza	0	0.0125	NaN	BAX
Role of NANOG in Mammalian Embryonic Stem Cell Pluripotency	0	0.0168	NaN	APC,DVL1
Role of NFAT in Cardiac Hypertrophy	0	0.028	NaN	GNB4,HDAC2,HDAC3,HDAC7,MEF2D,PDIA3
Role of NFAT in Regulation of the Immune Response	0.418	0.0387	1.342	GNB4,GSK3A,HLA-A,HLA-B,MEF2D,RELA,XPO1
Role of Oct4 in Mammalian Embryonic Stem Cell Pluripotency	0.719	0.0652	NaN	BRCA1,IGF2BP1,PHB
Role of Osteoblasts, Osteoclasts and Chondrocytes in Rheumatoid Arthritis	0	0.0273	NaN	APC,DVL1,IL18,ITGA3,RELA,TAB2
Role of p14/p19ARF in Tumor Suppression	0.208	0.0345	NaN	RAC1
Role of Pattern Recognition Receptors in Recognition of Bacteria and Viruses	0	0.0325	NaN	EIF2AK2,IL18,OAS2,OAS3,RELA
Role of PI3K/AKT Signaling in the Pathogenesis of Influenza	0	0.0156	NaN	RELA
Role of PKR in Interferon Induction and Antiviral Response	3.33	0.103	-0.302	BAX,CYCS,EIF2AK2,HSP90B1,HSPA1A/HSPA1B,HSPA2,HSPA5,HSPA8,HSPA9,IL18,RELA,TAB2
Role of RIG1-like Receptors in Antiviral Innate Immunity	0	0.0227	NaN	RELA
Role of Tissue Factor in Cancer	2.29	0.0855	NaN	CDC42,F2,FGB,ITGA3,ITGAV,MTOR,P4HB,PDIA6,RAC1,YES1
Role of Wnt/GSK-3Î² Signaling in the Pathogenesis of Influenza	0.597	0.0513	1	APC,DVL1,DVL2,DVL3
S-adenosyl-L-methionine Biosynthesis	1.02	0.333	NaN	MAT2A
Salvage Pathways of Pyrimidine Ribonucleotides	0.672	0.0515	2.236	CDK1,CDK5,EIF2AK2,NME1,NME2
SAPK/JNK Signaling	0	0.0196	NaN	CDC42,RAC1
Semaphorin Signaling in Neurons	1.87	0.1	NaN	CDC42,CDK5,RAC1,RHOA,RHOC,RHOG
Senescence Pathway	0	0.0327	1.667	CAPN1,CAPN2,CAPNS1,CAT,CDK1,DLD,MTOR,PPP2R1A,SERPINE1
Serotonin Degradation	2.2	0.104	2.646	ALDH1A1,ALDH1A3,ALDH1B1,ALDH2,ALDH3A1,ALDH3A2,ALDH3B1
Sertoli Cell-Sertoli Cell Junction Signaling	4.4	0.0973	NaN	ACTA1,ACTB,ACTN1,ACTN2,ACTN4,CDC42,GSK3A,ITGA3,RAC1,TUBA1A,TUBA1C,TUBA4A,TUBB,TUBB2A,TUBB3,TUBB4A,TUBB4B,TUBB6
Signaling by Rho Family GTPases	2.53	0.0697	4	ACTA1,ACTB,ACTR3,ARPC1B,ARPC4,CDC42,EZR,GNB4,ITGA3,MSN,MYL6,RAC1,RDX,RELA,RHOA,RHOC,RHOG
Sirtuin Signaling Pathway	11.1	0.124	1.279	APEX1,ATP5F1A,ATP5F1B,BAX,CPS1,CYC1,GLS,GLUD1,GOT2,H1-0,H1-1,H1-10,H1-2,H1-4,H1-5,LDHA,LDHB,MTOR,NAMPT,NQO1,PGK1,PPIF,RELA,SLC25A5,SLC25A6,SLC2A1,TOMM40,TOMM70,TUBA1A,TUBA1C,TUBA4A,TUBA4B,UQCRC2,VDAC1,VDAC2,VDAC3
Small Cell Lung Cancer Signaling	0	0.0282	NaN	CYCS,RELA
Sonic Hedgehog Signaling	0.609	0.069	NaN	CDK1,GRK2
Sperm Motility	0	0.0179	NaN	EPHA2,EPHB1,PDIA3,YES1
Sphingosine-1-phosphate Signaling	0.73	0.0513	2.236	CDC42,PDIA3,RAC1,RHOA,RHOC,RHOG
SPINK1 General Cancer Pathway	0	0.0145	NaN	PRSS3
SPINK1 Pancreatic Cancer Pathway	0.23	0.0333	NaN	CPA4,PRSS3
STAT3 Pathway	0	0.0148	NaN	FGF2,RAC1
Stearate Biosynthesis I (Animals)	1.74	0.106	2.236	ACOT7,ACSL3,ELOVL1,MBOAT7,SLC27A2
Sucrose Degradation V (Mammalian)	2.6	0.333	NaN	ALDOA,ALDOC,TPI1
Sumoylation Pathway	2.69	0.0971	-2	CDC42,HDAC2,KDM1A,RAC1,RAN,RFC1,RHOA,RHOC,RHOG,UBA2
Superoxide Radicals Degradation	1.58	0.25	NaN	CAT,NQO1
Superpathway of Cholesterol Biosynthesis	1.17	0.103	NaN	DHCR7,HADHA,HADHB
Superpathway of Citrulline Metabolism	2.93	0.267	2	ALDH18A1,ARG1,CPS1,GLS
Superpathway of Geranylgeranyldiphosphate Biosynthesis I (via Mevalonate)	0.936	0.111	NaN	HADHA,HADHB
Superpathway of Inositol Phosphate Compounds	0	0.0152	NaN	ATP1A1,NUDT5,PTPN12
Superpathway of Methionine Degradation	4.67	0.216	2.828	AHCY,AHCYL1,DLD,GOT2,MAT2A,PCCA,PRMT1,PRMT5
Superpathway of Serine and Glycine Biosynthesis I	0.682	0.143	NaN	SHMT2
Synaptic Long Term Depression	0	0.0106	NaN	PDIA3,PPP2R1A
Synaptic Long Term Potentiation	0	0.00775	NaN	PDIA3
Synaptogenesis Signaling Pathway	1.54	0.0545	3.638	ACTR3,AP1G2,AP2A1,AP2M1,ARPC1B,ARPC4,CDC42,CDK5,EPHA2,EPHB1,HSPA8,ITSN1,MTOR,RAB5C,RAC1,RHOA,YES1
Systemic Lupus Erythematosus In B Cell Signaling Pathway	0	0.0255	2.646	IFIT2,IL18,ISG15,MTOR,RAC1,RELA,YES1
Systemic Lupus Erythematosus In T Cell Signaling Pathway	0.686	0.042	3.742	CDC42,EZR,HLA-A,HLA-B,HLA-G,MSN,MTOR,PPP2R1A,RAC1,RDX,RHOA,RHOC,RHOG,YES1
Systemic Lupus Erythematosus Signaling	4.64	0.0917	NaN	EFTUD2,HLA-A,HLA-B,HLA-G,IL18,LSM12,LSM14A,MTOR,PRPF4,PRPF40A,SF3B4,SNRPA1,SNRPB,SNRPC,SNRPD1,SNRPD2,SNRPD3,SNRPE,SNRPF,SNRPG,SNU13
T Cell Exhaustion Signaling Pathway	0	0.0286	NaN	HLA-A,HLA-B,HLA-G,MTOR,PPP2R1A
T Cell Receptor Signaling	0	0.019	NaN	RAC1,RELA
T Helper Cell Differentiation	0.367	0.0411	NaN	HLA-A,HLA-B,IL18
TCA Cycle II (Eukaryotic)	4.01	0.25	2.449	ACO1,ACO2,CS,DLD,DLST,MDH1
Tec Kinase Signaling	1.71	0.0671	2.828	ACTA1,ACTB,CDC42,GNB4,ITGA3,RAC1,RELA,RHOA,RHOC,RHOG,YES1
Telomerase Signaling	0.562	0.0467	NaN	HDAC2,HDAC3,HDAC7,HSP90B1,PPP2R1A
Tetrahydrofolate Salvage from 5,10-methenyltetrahydrofolate	2	0.4	NaN	GART,MTHFD1
TGF-Î² Signaling	0	0.0208	NaN	CDC42,SERPINE1
Th1 and Th2 Activation Pathway	0	0.0175	NaN	HLA-A,HLA-B,IL18
Th1 Pathway	0	0.0248	NaN	HLA-A,HLA-B,IL18
Th17 Activation Pathway	0.239	0.033	NaN	HSP90B1,MTOR,RELA
Th2 Pathway	0	0.0147	NaN	HLA-A,HLA-B
The Visual Cycle	0.86	0.1	NaN	AKR1B10,AKR1C3
Thrombin Signaling	0.833	0.0481	2.449	CDC42,F2,GNB4,MYL6,PDIA3,RAC1,RELA,RHOA,RHOC,RHOG
Thyroid Cancer Signaling	0	0.0127	NaN	MTOR
Tight Junction Signaling	1.64	0.0655	NaN	ACTA1,ACTB,CDC42,CPSF6,MARK2,MYL6,PPP2R1A,RAB13,RAC1,RELA,RHOA
TNFR1 Signaling	0.648	0.06	NaN	CDC42,CYCS,RELA
TNFR2 Signaling	0.199	0.0333	NaN	RELA
Toll-like Receptor Signaling	1.42	0.0789	NaN	EIF2AK2,IL18,RELA,TAB2,TOLLIP,UBB
TR/RXR Activation	5.48	0.155	NaN	ACACA,AKR1C1/AKR1C2,AKR1C3,ENO1,HDAC3,HP,ME1,MTOR,NCOR1,NCOR2,SLC16A3,SLC2A1,STRBP
Transcriptional Regulatory Network in Embryonic Stem Cells	0	0.0185	NaN	TRIM24
Trehalose Degradation II (Trehalase)	1.69	0.286	NaN	HK1,HKDC1
TREM1 Signaling	0	0.0267	NaN	IL18,RELA
Triacylglycerol Biosynthesis	0.801	0.0714	NaN	ELOVL1,LPIN2,MBOAT7
Triacylglycerol Degradation	0	0.0213	NaN	CES1
tRNA Charging	4.49	0.205	2.828	DARS1,FARSA,HARS1,KARS1,MARS1,RARS1,WARS1,YARS1
tRNA Splicing	0	0.0233	NaN	APEX1
Tryptophan Degradation III (Eukaryotic)	4.12	0.261	2.449	HADHA,HADHB,HSD17B10,HSD17B4,KYNU,PARK7
Tryptophan Degradation to 2-amino-3-carboxymuconate Semialdehyde	0.742	0.167	NaN	KYNU
Tryptophan Degradation X (Mammalian, via Tryptamine)	6.07	0.32	2.646	AKR1B10,ALDH1A1,ALDH1A3,ALDH1B1,ALDH2,ALDH3A1,ALDH3A2,ALDH3B1
Tumoricidal Function of Hepatic Natural Killer Cells	1.37	0.125	NaN	BAX,CYCS,M6PR
TWEAK Signaling	0.496	0.0571	NaN	CYCS,RELA
Type I Diabetes Mellitus Signaling	0.804	0.0541	NaN	CYCS,HLA-A,HLA-B,HLA-G,HSPD1,RELA
Type II Diabetes Mellitus Signaling	0.302	0.0352	NaN	ACSL3,MTOR,PKM,RELA,SLC27A2
UDP-N-acetyl-D-galactosamine Biosynthesis II	3.19	0.308	NaN	GNPDA1,GPI,HK1,HKDC1
Unfolded protein response	4.1	0.161	2.828	HSP90B1,HSPA1A/HSPA1B,HSPA2,HSPA5,HSPA8,HSPA9,P4HB,PDIA6,VCP
Urate Biosynthesis/Inosine 5'-phosphate Degradation	2.11	0.231	NaN	IMPDH2,NT5C3A,PNP
Urea Cycle	1.83	0.333	NaN	ARG1,CPS1
Uridine-5'-phosphate Biosynthesis	1.19	0.5	NaN	UMPS
UVA-Induced MAPK Signaling	0.66	0.051	NaN	CYCS,MTOR,PARP12,PARP9,PDIA3
UVB-Induced MAPK Signaling	0	0.0192	NaN	MTOR
Valine Degradation I	1.7	0.167	NaN	DLD,HADHA,HADHB
VDR/RXR Activation	0.597	0.0513	0	CSNK2A1,NCOR1,NCOR2,SERPINB1
VEGF Signaling	2.28	0.0909	2.449	ACTA1,ACTB,ACTN1,ACTN2,ACTN4,EIF2S3,ELAVL1,SFN,YWHAE
Virus Entry via Endocytic Pathways	5.67	0.14	NaN	ACTA1,ACTB,AP1G1,AP1G2,AP2A1,AP2M1,AP3M1,CDC42,CLTC,HLA-A,HLA-B,ITGA3,ITSN1,RAC1,TFRC
Vitamin-C Transport	1.37	0.125	NaN	GLRX,GSTO1,SLC2A1
White Adipose Tissue Browning Pathway	0	0.0155	NaN	LDHA,LDHB
Wnt/Ca+ pathway	1.28	0.0806	2.236	DVL1,DVL2,DVL3,PDIA3,RELA
Wnt/Î²-catenin Signaling	0.936	0.052	0.707	APC,CSNK2A1,DVL1,DVL2,DVL3,GSK3A,MARK2,PPP2R1A,UBB
Xanthine and Xanthosine Salvage	1.48	1	NaN	PNP
Xenobiotic Metabolism CAR Signaling Pathway	3.77	0.0899	4.123	ALDH16A1,ALDH18A1,ALDH1A1,ALDH1A3,ALDH1B1,ALDH2,ALDH3A1,ALDH3A2,ALDH3B1,DNAJC7,GSTO1,GSTP1,HSP90B1,MGST1,MGST3,PPP2R1A,RACK1
Xenobiotic Metabolism General Signaling Pathway	0.484	0.042	2.449	FTL,GSTO1,GSTP1,MGST1,MGST3,NQO1
Xenobiotic Metabolism PXR Signaling Pathway	5.26	0.104	2.236	ALDH16A1,ALDH18A1,ALDH1A1,ALDH1A3,ALDH1B1,ALDH2,ALDH3A1,ALDH3A2,ALDH3B1,CAT,CDK5,CES1,DNAJC7,GSTO1,GSTP1,HSP90B1,MGST1,MGST3,NCOR1,NCOR2
Xenobiotic Metabolism Signaling	3.67	0.0767	NaN	ALDH16A1,ALDH18A1,ALDH1A1,ALDH1A3,ALDH1B1,ALDH2,ALDH3A1,ALDH3A2,ALDH3B1,CAT,CES1,DNAJC7,FTL,GSTO1,GSTP1,HSP90B1,MGST1,MGST3,NCOR2,NQO1,PPP2R1A,RELA

## Sheet: HDAC3_LPS+MS275 canonical pathw
Â© 2000-2020 QIAGEN. All rights reserved.
Ingenuity Canonical Pathways	-log(p-value)	Ratio	z-score	Molecules
4-1BB Signaling in T Lymphocytes	1.06	0.0625	NaN	CHUK,RELA
Actin Cytoskeleton Signaling	1.68	0.0367	2.828	ACTR2,ARPC1B,ARPC4,BCAR1,F2,ITGA3,PFN2,RHOA
Actin Nucleation by ARP-WASP Complex	3.06	0.0833	2.449	ACTR2,ARPC1B,ARPC4,ITGA3,RHOA,RHOC
Activation of IRF by Cytosolic Pattern Recognition Receptors	0.592	0.0317	NaN	CHUK,RELA
Acute Myeloid Leukemia Signaling	0	0.0112	NaN	RELA
Acute Phase Response Signaling	1.22	0.0335	2.236	CHUK,F2,FTL,IL18,IRAK1,RELA
Acyl-CoA Hydrolysis	0.735	0.0769	NaN	ACOT7
Adenine and Adenosine Salvage I	3.62	1	NaN	APRT,PNP
Adenine and Adenosine Salvage III	1.05	0.167	NaN	PNP
Adenosine Nucleotides Degradation II	0.68	0.0667	NaN	PNP
Adipogenesis pathway	0.81	0.0299	NaN	CDK5,HDAC2,HDAC3,RB1
Adrenomedullin signaling pathway	0	0.0102	NaN	IL18,RELA
Agranulocyte Adhesion and Diapedesis	0	0.0104	NaN	IL18,ITGA3
Agrin Interactions at Neuromuscular Junction	0	0.0127	NaN	ITGA3
Aldosterone Signaling in Epithelial Cells	1	0.0316	NaN	DNAJA1,DNAJC7,HSPA1A/HSPA1B,HSPA2,HSPB1
Altered T Cell and B Cell Signaling in Rheumatoid Arthritis	0.785	0.0333	NaN	CHUK,IL18,RELA
AMPK Signaling	0	0.014	NaN	ACACA,ACACB,ELAVL1
Amyloid Processing	0.74	0.04	NaN	CDK5,CSNK1A1
Amyotrophic Lateral Sclerosis Signaling	0.352	0.0206	NaN	CAT,CYCS
Androgen Biosynthesis	0.656	0.0625	NaN	AKR1C3
Androgen Signaling	0	0.00735	NaN	RELA
Angiopoietin Signaling	0.489	0.0267	NaN	CHUK,RELA
Antioxidant Action of Vitamin C	0.622	0.0275	NaN	CHUK,GLRX,RELA
Antiproliferative Role of TOB in T Cell Signaling	1.65	0.0769	NaN	PABPC1,PABPC4,RB1
Apelin Adipocyte Signaling Pathway	0	0.0122	NaN	CAT
Apelin Cardiomyocyte Signaling Pathway	0	0.0101	NaN	CAT
Apelin Endothelial Signaling Pathway	0	0.0087	NaN	RELA
Apelin Pancreas Signaling Pathway	0.304	0.0227	NaN	RELA
Apoptosis Signaling	1.17	0.0404	0	CDK1,CHUK,CYCS,RELA
April Mediated Signaling	0.914	0.0513	NaN	CHUK,RELA
Arsenate Detoxification I (Glutaredoxin)	1.22	0.25	NaN	PNP
Aryl Hydrocarbon Receptor Signaling	3.39	0.0629	1.342	ALDH3A1,ALDH3B1,HSPB1,NCOA3,NCOR2,NEDD8,NQO1,RB1,RELA
Ascorbate Recycling (Cytosolic)	1.22	0.25	NaN	GLRX
Atherosclerosis Signaling	0.509	0.0238	NaN	ALOX12B,IL18,RELA
ATM Signaling	0.352	0.0206	NaN	BRCA1,CDK1
Axonal Guidance Signaling	0.472	0.0186	NaN	ACTR2,ARPC1B,ARPC4,BCAR1,CDK5,EPHB1,ITGA3,PFN2,RHOA
B Cell Activating Factor Signaling	0.876	0.0488	NaN	CHUK,RELA
B Cell Receptor Signaling	0	0.0108	NaN	CHUK,RELA
BAG2 Signaling Pathway	2.36	0.093	0	HSPA1A/HSPA1B,HSPA2,PSME4,RELA
BER pathway	0.767	0.0833	NaN	FEN1
BEX2 Signaling Pathway	0	0.0127	NaN	RELA
Bile Acid Biosynthesis, Neutral Pathway	1.78	0.154	NaN	AKR1C1/AKR1C2,AKR1C3
Biotin-carboxyl Carrier Protein Assembly	3.15	0.667	NaN	ACACA,ACACB
Bladder Cancer Signaling	0	0.0103	NaN	RB1
BMP signaling pathway	0	0.0118	NaN	RELA
Breast Cancer Regulation by Stathmin1	0	0.00677	NaN	ANKHD1/ANKHD1-EIF4EBP3,ARHGEF2,CDK1,RHOA
Calcium Signaling	0	0.00971	NaN	HDAC2,HDAC3
Calcium-induced T Lymphocyte Apoptosis	0	0.0152	NaN	HDAC2
Cardiac Hypertrophy Signaling	0	0.0125	NaN	HSPB1,RHOA,RHOC
Cardiac Hypertrophy Signaling (Enhanced)	0.463	0.0185	1.667	CHUK,HDAC2,HDAC3,HSPB1,IL18,ITGA3,RELA,RHOA,RPS6
Caveolar-mediated Endocytosis Signaling	0	0.0137	NaN	ITGA3
CCR3 Signaling in Eosinophils	0	0.00806	NaN	RHOA
CD27 Signaling in Lymphocytes	1.31	0.0566	NaN	CHUK,CYCS,RELA
CD28 Signaling in T Helper Cells	1.41	0.0417	2.236	ACTR2,ARPC1B,ARPC4,CHUK,RELA
CD40 Signaling	0.573	0.0308	NaN	CHUK,RELA
Cdc42 Signaling	0.585	0.024	2	ACTR2,ARPC1B,ARPC4,ITGA3
CDK5 Signaling	0.3	0.0185	NaN	CDK5,ITGA3
Cell Cycle Control of Chromosomal Replication	1.25	0.0536	NaN	CDK1,CDK11A,CDK5
Cell Cycle Regulation by BTG Family Proteins	0.358	0.027	NaN	RB1
Cell Cycle: G1/S Checkpoint Regulation	1.69	0.0597	0	HDAC2,HDAC3,RB1,RPL11
Cell Cycle: G2/M DNA Damage Checkpoint Regulation	0.754	0.0408	NaN	BRCA1,CDK1
Cellular Effects of Sildenafil (Viagra)	0	0.00763	NaN	PABPC4
Ceramide Signaling	0.401	0.0227	NaN	CYCS,RELA
Chemokine Signaling	0	0.0125	NaN	RHOA
Cholecystokinin/Gastrin-mediated Signaling	0.943	0.0336	2	BCAR1,IL18,RHOA,RHOC
Chondroitin Sulfate Biosynthesis	0.234	0.0179	NaN	SULT1A3/SULT1A4
Chondroitin Sulfate Biosynthesis (Late Stages)	0.277	0.0208	NaN	SULT1A3/SULT1A4
Chronic Myeloid Leukemia Signaling	1.65	0.0485	NaN	CHUK,HDAC2,HDAC3,RB1,RELA
Clathrin-mediated Endocytosis Signaling	1.97	0.0415	NaN	AAK1,ACTR2,AP2A1,AP3M1,ARPC1B,ARPC4,F2,UBB
Coagulation System	0.376	0.0286	NaN	F2
Colorectal Cancer Metastasis Signaling	0	0.0119	NaN	RELA,RHOA,RHOC
Communication between Innate and Adaptive Immune Cells	0	0.0104	NaN	IL18
Complement System	0.358	0.027	NaN	CD59
Crosstalk between Dendritic Cells and Natural Killer Cells	0.796	0.0337	NaN	FSCN1,IL18,RELA
CTLA4 Signaling in Cytotoxic T Lymphocytes	0	0.0112	NaN	AP2A1
CXCR4 Signaling	0.319	0.018	NaN	BCAR1,RHOA,RHOC
Cyclins and Cell Cycle Regulation	1.43	0.0494	NaN	CDK1,HDAC2,HDAC3,RB1
Cysteine Biosynthesis III (mammalia)	0.504	0.0417	NaN	PRMT5
Cytotoxic T Lymphocyte-mediated Apoptosis of Target Cells	0.385	0.0294	NaN	CYCS
Death Receptor Signaling	3.27	0.0769	1.89	CHUK,CYCS,HSPB1,PARP12,PARP14,PARP9,RELA
Dendritic Cell Maturation	0.5	0.0219	2	CHUK,FSCN1,IL18,RELA
Dermatan Sulfate Biosynthesis	0.22	0.0169	NaN	SULT1A3/SULT1A4
Dermatan Sulfate Biosynthesis (Late Stages)	0.29	0.0217	NaN	SULT1A3/SULT1A4
DNA damage-induced 14-3-3Ïƒ Signaling	1.46	0.105	NaN	BRCA1,CDK1
DNA Double-Strand Break Repair by Homologous Recombination	0.708	0.0714	NaN	BRCA1
DNA Methylation and Transcriptional Repression Signaling	0.376	0.0286	NaN	HDAC2
Docosahexaenoic Acid (DHA) Signaling	0.349	0.0263	NaN	CYCS
Dopamine Degradation	1.96	0.1	NaN	ALDH3A1,ALDH3B1,SULT1A3/SULT1A4
Dopamine-DARPP32 Feedback in cAMP Signaling	0	0.0123	NaN	CDK5,CSNK1A1
Eicosanoid Signaling	0.564	0.0303	NaN	AKR1C3,ALOX12B
EIF2 Signaling	23.1	0.152	4.243	CDK11A,EIF2AK2,EIF3K,EIF4G2,FAU,PABPC1,PTBP1,RPL10,RPL10A,RPL11,RPL12,RPL13,RPL14,RPL17,RPL18,RPL21,RPL23,RPL26,RPL28,RPL3,RPL8,RPLP0,RPS11,RPS14,RPS15A,RPS16,RPS18,RPS2,RPS3,RPS4X,RPS5,RPS6,RPS7,RPS9
Endocannabinoid Cancer Inhibition Pathway	0	0.00699	NaN	RHOA
Endocannabinoid Developing Neuron Pathway	0.272	0.0174	NaN	BRCA1,RHOA
eNOS Signaling	0	0.0126	NaN	HSPA1A/HSPA1B,HSPA2
Ephrin A Signaling	0.783	0.0426	NaN	BCAR1,RHOA
Ephrin B Signaling	0.513	0.0278	NaN	EPHB1,RHOA
Ephrin Receptor Signaling	1.65	0.0389	2.449	ACTR2,ARPC1B,ARPC4,BCAR1,EPHB1,ITGA3,RHOA
Epithelial Adherens Junction Signaling	1.05	0.0329	NaN	ACTR2,ARPC1B,ARPC4,RHOA,YES1
ERK/MAPK Signaling	0.238	0.0155	NaN	BCAR1,HSPB1,ITGA3
Erythropoietin Signaling	0	0.0132	NaN	RELA
Estrogen Biosynthesis	0.325	0.0244	NaN	AKR1C3
Estrogen Receptor Signaling	0.857	0.0244	-0.707	HDAC3,MT-ATP6,NCOA3,NCOR1,NCOR2,RBFOX2,RELA,RHOA
Estrogen-Dependent Breast Cancer Signaling	0	0.0135	NaN	RELA
Estrogen-mediated S-phase Entry	1.21	0.0769	NaN	CDK1,RB1
Ethanol Degradation II	1.88	0.0938	NaN	ADH5,ALDH3A1,ALDH3B1
Ethanol Degradation IV	2.28	0.13	NaN	ALDH3A1,ALDH3B1,CAT
Eumelanin Biosynthesis	1.12	0.2	NaN	MIF
Extrinsic Prothrombin Activation Pathway	0.656	0.0625	NaN	F2
Factors Promoting Cardiogenesis in Vertebrates	0	0.00667	NaN	RHOA
FAK Signaling	0.738	0.0316	NaN	BCAR1,HMMR,ITGA3
FAT10 Cancer Signaling Pathway	0.799	0.0435	NaN	CHUK,RELA
FAT10 Signaling Pathway	0.611	0.0556	NaN	PSME4
Fatty Acid Î±-oxidation	2.46	0.15	NaN	ALDH3A1,ALDH3B1,ALOX12B
Fatty Acid Î²-oxidation I	0.405	0.0312	NaN	HADHB
FcÎ³ Receptor-mediated Phagocytosis in Macrophages and Monocytes	1.23	0.0426	2	ACTR2,ARPC1B,ARPC4,YES1
fMLP Signaling in Neutrophils	0.975	0.0345	2	ACTR2,ARPC1B,ARPC4,RELA
Formaldehyde Oxidation II (Glutathione-dependent)	1.51	0.5	NaN	ADH5
FXR/RXR Activation	0	0.00794	NaN	IL18
GABA Receptor Signaling	0.362	0.0211	NaN	AP2A1,UBB
GADD45 Signaling	1.46	0.105	NaN	BRCA1,CDK1
Gap Junction Signaling	0	0.00505	NaN	CSNK1A1
Germ Cell-Sertoli Cell Junction Signaling	0.562	0.0234	NaN	BCAR1,ITGA3,RHOA,RHOC
GÎ±12/13 Signaling	0.842	0.0308	2	CHUK,F2,RELA,RHOA
GÎ±q Signaling	0.638	0.0253	2	CHUK,RELA,RHOA,RHOC
Glioblastoma Multiforme Signaling	0.326	0.0182	NaN	RB1,RHOA,RHOC
Glioma Invasiveness Signaling	0.967	0.0405	NaN	HMMR,RHOA,RHOC
Glioma Signaling	0	0.00909	NaN	RB1
Glucocorticoid Receptor Signaling	0.815	0.0238	NaN	CHUK,HSPA1A/HSPA1B,HSPA2,KRT10,NCOA3,NCOR1,NCOR2,RELA
Gluconeogenesis I	0.476	0.0385	NaN	ALDOC
Glutaryl-CoA Degradation	0.656	0.0625	NaN	HADHB
Glutathione Redox Reactions I	0.504	0.0417	NaN	GSR
Glutathione Redox Reactions II	2.85	0.5	NaN	GLRX,GSR
Glycerol Degradation I	1.05	0.167	NaN	GPD2
Glycerol-3-phosphate Shuttle	1.34	0.333	NaN	GPD2
Glycolysis I	0.476	0.0385	NaN	ALDOC
GM-CSF Signaling	0	0.0143	NaN	RACK1
GNRH Signaling	0	0.00578	NaN	RELA
G-Protein Coupled Receptor Signaling	0	0.00735	NaN	CHUK,RELA
Graft-versus-Host Disease Signaling	0.277	0.0208	NaN	IL18
Granulocyte Adhesion and Diapedesis	0	0.0111	NaN	IL18,ITGA3
Granzyme A Signaling	5.07	0.263	NaN	H1-0,H1-1,H1-10,H1-2,H1-4
Granzyme B Signaling	0.656	0.0625	NaN	CYCS
Guanine and Guanosine Salvage I	1.51	0.5	NaN	PNP
Guanosine Nucleotides Degradation III	0.767	0.0833	NaN	PNP
Heme Degradation	1.22	0.25	NaN	BLVRA
Heparan Sulfate Biosynthesis	0	0.0128	NaN	SULT1A3/SULT1A4
Heparan Sulfate Biosynthesis (Late Stages)	0	0.0141	NaN	SULT1A3/SULT1A4
Hepatic Cholestasis	0.491	0.0216	NaN	CHUK,IL18,IRAK1,RELA
Hepatic Fibrosis / Hepatic Stellate Cell Activation	0	0.00538	NaN	RELA
Hepatic Fibrosis Signaling Pathway	0.921	0.0245	3	CHUK,FTH1,FTL,IL18,IRAK1,ITGA3,RELA,RHOA,RHOC
Hereditary Breast Cancer Signaling	1.66	0.0429	NaN	BRCA1,CDK1,HDAC2,HDAC3,RB1,UBB
HGF Signaling	0	0.00901	NaN	ITGA3
Histamine Degradation	1.55	0.118	NaN	ALDH3A1,ALDH3B1
Histidine Degradation III	0.932	0.125	NaN	HAL
Histidine Degradation VI	0.68	0.0667	NaN	HAL
HMGB1 Signaling	0.595	0.0242	2	IL18,RELA,RHOA,RHOC
HOTAIR Regulatory Pathway	0.625	0.025	1	ELAVL1,HDAC2,RELA,RHOC
Huntington's Disease Signaling	2.39	0.0422	0	CDK5,CYCS,HDAC2,HDAC3,HSPA1A/HSPA1B,HSPA2,NCOR1,NCOR2,PSME4,UBB
Hypoxia Signaling in the Cardiovascular System	0.496	0.027	NaN	NQO1,UBE2D3
iCOS-iCOSL Signaling in T Helper Cells	0.288	0.018	NaN	CHUK,RELA
IGF-1 Signaling	0	0.00962	NaN	CCN1
IL-1 Signaling	1.27	0.044	1	CHUK,IRAK1,RELA,TOLLIP
IL-10 Signaling	1.65	0.058	NaN	BLVRA,CHUK,IL18,RELA
IL-12 Signaling and Production in Macrophages	0.474	0.0227	NaN	CHUK,IL18,RELA
IL-15 Production	0.539	0.0248	NaN	EPHB1,RELA,YES1
IL-15 Signaling	0	0.0133	NaN	RELA
IL-17 Signaling	0.452	0.025	NaN	MUC5B,RELA
IL-17A Signaling in Airway Cells	1.74	0.0615	NaN	CHUK,MUC5AC,MUC5B,RELA
IL-17A Signaling in Fibroblasts	0.991	0.0571	NaN	CHUK,RELA
IL-17A Signaling in Gastric Cells	0.491	0.04	NaN	RELA
IL-23 Signaling Pathway	0.304	0.0227	NaN	RELA
IL-6 Signaling	0.886	0.032	2	CHUK,HSPB1,IL18,RELA
IL-8 Signaling	1.04	0.03	2.449	CHUK,CSTB,IRAK1,RELA,RHOA,RHOC
IL-9 Signaling	0.395	0.0303	NaN	RELA
ILK Signaling	0.469	0.0211	NaN	DSP,RELA,RHOA,RHOC
Induction of Apoptosis by HIV1	1.16	0.0492	NaN	CHUK,CYCS,RELA
Inflammasome pathway	0.572	0.05	NaN	IL18
Inhibition of ARE-Mediated mRNA Degradation Pathway	0	0.0082	NaN	PSME4
iNOS Signaling	1.49	0.0667	NaN	CHUK,IRAK1,RELA
Inosine-5'-phosphate Biosynthesis II	1.34	0.333	NaN	ATIC
Integrin Signaling	1.74	0.0376	2.828	ACTR2,ARPC1B,ARPC4,BCAR1,ITGA3,PFN2,RHOA,RHOC
Interferon Signaling	0.971	0.0556	NaN	PIAS1,RELA
Intrinsic Prothrombin Activation Pathway	0.318	0.0238	NaN	F2
Iron homeostasis signaling pathway	0.447	0.0219	NaN	ACO2,FTH1,FTL
Isoleucine Degradation I	0.68	0.0667	NaN	HADHB
JAK/Stat Signaling	0.452	0.025	NaN	PIAS1,RELA
Ketogenesis	0.801	0.0909	NaN	HADHB
Ketolysis	0.839	0.1	NaN	HADHB
Leukocyte Extravasation Signaling	0	0.0152	NaN	BCAR1,ITGA3,RHOA
Lipid Antigen Presentation by CD1	0.476	0.0385	NaN	AP2A1
LPS/IL-1 Mediated Inhibition of RXR Function	0.866	0.0268	NaN	ALDH3A1,ALDH3B1,CAT,IL18,IRAK1,SULT1A3/SULT1A4
LPS-stimulated MAPK Signaling	0.439	0.0244	NaN	CHUK,RELA
LXR/RXR Activation	1.39	0.0413	NaN	ACACA,IL18,NCOR1,NCOR2,RELA
Lymphotoxin Î² Receptor Signaling	1.31	0.0566	NaN	CHUK,CYCS,RELA
Macropinocytosis Signaling	0	0.0132	NaN	RHOA
Melanoma Signaling	0.266	0.02	NaN	RB1
Melatonin Degradation I	0.215	0.0167	NaN	SULT1A3/SULT1A4
Methionine Degradation I (to Homocysteine)	0.536	0.0455	NaN	PRMT5
Methylglyoxal Degradation III	2.6	0.167	NaN	AKR1B1,AKR1C1/AKR1C2,AKR1C3
Mevalonate Pathway I	0.708	0.0714	NaN	HADHB
MIF Regulation of Innate Immunity	0.86	0.0476	NaN	MIF,RELA
MIF-mediated Glucocorticoid Regulation	1.01	0.0588	NaN	MIF,RELA
Mismatch Repair in Eukaryotes	0.656	0.0625	NaN	FEN1
Mitochondrial Dysfunction	3.46	0.0585	NaN	ACO2,CAT,CYCS,GPD2,GSR,MT-ATP6,MT-ND5,PRDX3,UQCR10,UQCRC1
Mitotic Roles of Polo-Like Kinase	0.564	0.0303	NaN	CDK1,PRC1
Molecular Mechanisms of Cancer	1.37	0.0281	NaN	ARHGEF2,BRCA1,CDK1,CDK11A,CDK5,CYCS,ITGA3,RB1,RELA,RHOA,RHOC
mTOR Signaling	7.47	0.081	NaN	EIF3K,EIF4G2,FAU,RHOA,RHOC,RPS11,RPS14,RPS15A,RPS16,RPS18,RPS2,RPS3,RPS4X,RPS5,RPS6,RPS7,RPS9
Myc Mediated Apoptosis Signaling	0.74	0.04	NaN	CHUK,CYCS
Natural Killer Cell Signaling	0.438	0.0203	2	HSPA1A/HSPA1B,HSPA2,IL18,RELA
Necroptosis Signaling Pathway	1.01	0.0318	2.236	CHUK,EIF2AK2,PPIF,RB1,TOMM40
NER Pathway	0.322	0.0194	NaN	GPS1,NEDD8
Neuregulin Signaling	0.728	0.0312	NaN	CDK5,ITGA3,RPS6
Neuroinflammation Signaling Pathway	0	0.0133	1	CHUK,IL18,IRAK1,RELA
NF-ÎºB Activation by Viruses	1.41	0.0488	2	CHUK,EIF2AK2,ITGA3,RELA
NF-ÎºB Signaling	1.22	0.0335	1.633	CHUK,EIF2AK2,HDAC2,IL18,IRAK1,RELA
NGF Signaling	0.585	0.0263	NaN	CHUK,RELA,RHOA
Non-Small Cell Lung Cancer Signaling	0	0.0137	NaN	RB1
Noradrenaline and Adrenaline Degradation	1.77	0.0857	NaN	ADH5,ALDH3A1,ALDH3B1
NRF2-mediated Oxidative Stress Response	2.55	0.0476	2.449	CAT,CBR1,DNAJA1,DNAJC7,FTH1,FTL,GSR,NQO1,UBB
Nur77 Signaling in T Lymphocytes	0.633	0.0339	NaN	CYCS,HDAC2
Opioid Signaling Pathway	0	0.0081	NaN	AP2A1,YES1
Osteoarthritis Pathway	0.383	0.019	2	CHUK,HDAC3,ITGA3,RELA
Ovarian Cancer Signaling	0	0.0144	NaN	BRCA1,RB1
OX40 Signaling Pathway	0	0.0111	NaN	RELA
Oxidative Ethanol Degradation III	1.46	0.105	NaN	ALDH3A1,ALDH3B1
Oxidative Phosphorylation	1.56	0.0459	2.236	CYCS,MT-ATP6,MT-ND5,UQCR10,UQCRC1
P2Y Purigenic Receptor Signaling Pathway	0	0.00787	NaN	RELA
p38 MAPK Signaling	0.558	0.0254	NaN	HSPB1,IL18,IRAK1
p53 Signaling	0.71	0.0306	NaN	BRCA1,PIAS1,RB1
p70S6K Signaling	0.224	0.0155	NaN	F2,RPS6
PAK Signaling	0	0.0103	NaN	ITGA3
Pancreatic Adenocarcinoma Signaling	0.296	0.0183	NaN	RB1,RELA
Parkinson's Signaling	0.656	0.0625	NaN	CYCS
Paxillin Signaling	0.3	0.0185	NaN	BCAR1,ITGA3
PCP pathway	0.623	0.0333	NaN	PFN2,RHOA
PDGF Signaling	0	0.0116	NaN	EIF2AK2
PEDF Signaling	0.87	0.0366	NaN	CHUK,RELA,RHOA
PFKFB4 Signaling Pathway	0.29	0.0217	NaN	NCOA3
Phagosome Formation	0.514	0.024	NaN	ITGA3,RHOA,RHOC
Phospholipase C Signaling	0.975	0.0272	2.646	ARHGEF2,HDAC2,HDAC3,ITGA3,RELA,RHOA,RHOC
PI3K Signaling in B Lymphocytes	0	0.0145	NaN	CHUK,RELA
PI3K/AKT Signaling	0.292	0.0171	NaN	CHUK,ITGA3,RELA
PKCÎ¸ Signaling in T Lymphocytes	0	0.0129	NaN	CHUK,RELA
Polyamine Regulation in Colon Cancer	0.536	0.0455	NaN	PSME4
PPAR Signaling	1.64	0.0481	-2.236	CHUK,IL18,NCOR1,NCOR2,RELA
PPARÎ±/RXRÎ± Activation	1.54	0.0368	-2.449	CHUK,GPD2,NCOA3,NCOA6,NCOR1,NCOR2,RELA
Production of Nitric Oxide and Reactive Oxygen Species in Macrophages	0.775	0.0266	1.342	CAT,CHUK,RELA,RHOA,RHOC
Prostate Cancer Signaling	0.775	0.033	NaN	CHUK,RB1,RELA
Protein Kinase A Signaling	1.03	0.0251	2.121	CHUK,H1-0,H1-1,H1-10,H1-2,H1-4,KDELR1,PTPN14,RELA,RHOA
Protein Ubiquitination Pathway	4.59	0.0549	NaN	BRCA1,DNAJA1,DNAJC7,HSPA1A/HSPA1B,HSPA2,HSPB1,PSMA2,PSMA3,PSMA4,PSMA6,PSMA7,PSMB1,PSMC4,UBB,UBE2D3
PTEN Signaling	0.876	0.0317	-2	BCAR1,CHUK,ITGA3,RELA
Purine Nucleotides De Novo Biosynthesis II	0.801	0.0909	NaN	ATIC
Purine Nucleotides Degradation II (Aerobic)	0.611	0.0556	NaN	PNP
Purine Ribonucleosides Degradation to Ribose-1-phosphate	0.983	0.143	NaN	PNP
Putrescine Degradation III	1.38	0.0952	NaN	ALDH3A1,ALDH3B1
PXR/RXR Activation	0	0.0154	NaN	RELA
Pyridoxal 5'-phosphate Salvage Pathway	3.29	0.0923	2.449	CDK1,CDK5,CSNK1A1,EIF2AK2,IRAK1,TTK
Pyrimidine Deoxyribonucleotides De Novo Biosynthesis I	0.536	0.0455	NaN	DTYMK
Pyrimidine Ribonucleotides De Novo Biosynthesis	0.31	0.0233	NaN	UMPS
Rac Signaling	2.09	0.0536	2.449	ACTR2,ARPC1B,ARPC4,ITGA3,RELA,RHOA
RANK Signaling in Osteoclasts	0.401	0.0227	NaN	CHUK,RELA
RAR Activation	1.09	0.0309	NaN	AKR1B1,AKR1C3,NCOR1,NCOR2,RELA,TRIM24
Reelin Signaling in Neurons	3.73	0.0698	2.121	ACTR2,ARHGEF2,ARPC1B,ARPC4,CDK5,ITGA3,PAFAH1B2,RHOA,YES1
Regulation of Actin-based Motility by Rho	3.18	0.0745	2.646	ACTR2,ARPC1B,ARPC4,ITGA3,PFN2,RHOA,RHOC
Regulation of Cellular Mechanics by Calpain Protease	1.1	0.0462	NaN	CDK1,ITGA3,RB1
Regulation of eIF4 and p70S6K Signaling	9.4	0.108	NaN	EIF3K,EIF4G2,FAU,ITGA3,PABPC1,RPS11,RPS14,RPS15A,RPS16,RPS18,RPS2,RPS3,RPS4X,RPS5,RPS6,RPS7,RPS9
Regulation of IL-2 Expression in Activated and Anergic T Lymphocytes	0.396	0.0225	NaN	CHUK,RELA
Regulation of the Epithelial-Mesenchymal Transition Pathway	0	0.0104	NaN	RELA,RHOA
Relaxin Signaling	0	0.00667	NaN	RELA
Remodeling of Epithelial Adherens Junctions	1.05	0.0441	NaN	ACTR2,ARPC1B,ARPC4
Renal Cell Carcinoma Signaling	0	0.0125	NaN	UBB
Renin-Angiotensin Signaling	0	0.00847	NaN	RELA
Retinoate Biosynthesis I	1.01	0.0588	NaN	AKR1B1,AKR1C3
Retinoic acid Mediated Apoptosis Signaling	1.85	0.0667	2	CYCS,PARP12,PARP14,PARP9
Retinol Biosynthesis	0.318	0.0238	NaN	AKR1C3
RhoA Signaling	3.17	0.065	2.646	ACTR2,ANLN,ARPC1B,ARPC4,PFN2,RHOA,RHPN1,RHPN2
RhoGDI Signaling	1.65	0.0389	-2.646	ACTR2,ARHGEF2,ARPC1B,ARPC4,ITGA3,RHOA,RHOC
Role of BRCA1 in DNA Damage Response	0.452	0.025	NaN	BRCA1,RB1
Role of CHK Proteins in Cell Cycle Checkpoint Control	0.656	0.0351	NaN	BRCA1,CDK1
Role of Cytokines in Mediating Communication between Immune Cells	0.244	0.0185	NaN	IL18
Role of Hypercytokinemia/hyperchemokinemia in the Pathogenesis of Influenza	0.31	0.0233	NaN	IL18
Role of IL-17A in Arthritis	0.239	0.0182	NaN	RELA
Role of IL-17A in Psoriasis	0.735	0.0769	NaN	S100A7
Role of IL-17F in Allergic Inflammatory Airway Diseases	0.318	0.0238	NaN	RELA
Role of JAK1, JAK2 and TYK2 in Interferon Signaling	0.504	0.0417	NaN	RELA
Role of Macrophages, Fibroblasts and Endothelial Cells in Rheumatoid Arthritis	0.674	0.0224	NaN	CHUK,CSNK1A1,IL18,IRAK1,MIF,RELA,RHOA
Role of NFAT in Cardiac Hypertrophy	0	0.014	NaN	CSNK1A1,HDAC2,HDAC3
Role of NFAT in Regulation of the Immune Response	0.272	0.0166	NaN	CHUK,CSNK1A1,RELA
Role of Oct4 in Mammalian Embryonic Stem Cell Pluripotency	0.799	0.0435	NaN	BRCA1,RB1
Role of Osteoblasts, Osteoclasts and Chondrocytes in Rheumatoid Arthritis	0.592	0.0227	NaN	CHUK,CSNK1A1,IL18,ITGA3,RELA
Role of p14/p19ARF in Tumor Suppression	0.439	0.0345	NaN	RB1
Role of Pattern Recognition Receptors in Recognition of Bacteria and Viruses	0.664	0.026	NaN	EIF2AK2,IL18,OAS3,RELA
Role of PI3K/AKT Signaling in the Pathogenesis of Influenza	0.199	0.0156	NaN	RELA
Role of PKR in Interferon Induction and Antiviral Response	3.31	0.0684	1.414	CHUK,CYCS,EIF2AK2,HSPA1A/HSPA1B,HSPA2,IL18,PRKRA,RELA
Role of RIG1-like Receptors in Antiviral Innate Immunity	0.827	0.0455	NaN	CHUK,RELA
Role of Tissue Factor in Cancer	0.963	0.0342	NaN	CCN1,F2,ITGA3,YES1
Role of Wnt/GSK-3Î² Signaling in the Pathogenesis of Influenza	0.467	0.0256	NaN	CSNK1A1,NCOA3
Salvage Pathways of Pyrimidine Ribonucleotides	2.39	0.0619	2.449	CDK1,CDK5,CSNK1A1,EIF2AK2,IRAK1,TTK
Semaphorin Signaling in Neurons	1.18	0.05	NaN	CDK5,RHOA,RHOC
Senescence Pathway	0.593	0.0218	-0.816	CAT,CBX8,CDK1,CHUK,RB1,RNF2
Serine Biosynthesis	1.12	0.2	NaN	PHGDH
Serotonin Degradation	1.69	0.0597	2	ADH5,ALDH3A1,ALDH3B1,SULT1A3/SULT1A4
Sertoli Cell-Sertoli Cell Junction Signaling	0	0.0108	NaN	BCAR1,ITGA3
Signaling by Rho Family GTPases	1.43	0.0328	2.828	ACTR2,ARHGEF2,ARPC1B,ARPC4,ITGA3,RELA,RHOA,RHOC
Sirtuin Signaling Pathway	2.22	0.0378	1	H1-0,H1-1,H1-10,H1-2,H1-4,MT-ATP6,MT-ND5,NQO1,PPIF,RELA,TOMM40
Small Cell Lung Cancer Signaling	1.61	0.0563	0	CHUK,CYCS,RB1,RELA
Sonic Hedgehog Signaling	0.439	0.0345	NaN	CDK1
Sperm Motility	0	0.00897	NaN	EPHB1,YES1
Sphingosine-1-phosphate Signaling	0.264	0.0171	NaN	RHOA,RHOC
Stearate Biosynthesis I (Animals)	0.284	0.0213	NaN	ACOT7
Sucrose Degradation V (Mammalian)	0.883	0.111	NaN	ALDOC
Sumoylation Pathway	2.95	0.068	-0.447	HDAC2,PIAS1,RHOA,RHOC,SUMO2,SUMO4,ZNF217
Superoxide Radicals Degradation	2.2	0.25	NaN	CAT,NQO1
Superpathway of Cholesterol Biosynthesis	0.439	0.0345	NaN	HADHB
Superpathway of Geranylgeranyldiphosphate Biosynthesis I (via Mevalonate)	0.611	0.0556	NaN	HADHB
Superpathway of Melatonin Degradation	0	0.0154	NaN	SULT1A3/SULT1A4
Superpathway of Methionine Degradation	0.358	0.027	NaN	PRMT5
Superpathway of Serine and Glycine Biosynthesis I	0.983	0.143	NaN	PHGDH
Synaptogenesis Signaling Pathway	0.943	0.0256	2.121	ACTR2,AP2A1,ARPC1B,ARPC4,CDK5,EPHB1,RHOA,YES1
Systemic Lupus Erythematosus In B Cell Signaling Pathway	0	0.0145	2	IL18,IRAK1,RELA,YES1
Systemic Lupus Erythematosus In T Cell Signaling Pathway	0	0.00901	NaN	RHOA,RHOC,YES1
Systemic Lupus Erythematosus Signaling	0.548	0.0218	NaN	IL18,LSM12,LSM14A,SNRPB2,SNRPD1
T Cell Receptor Signaling	0.313	0.019	NaN	CHUK,RELA
T Helper Cell Differentiation	0	0.0137	NaN	IL18
TCA Cycle II (Eukaryotic)	0.504	0.0417	NaN	ACO2
Tec Kinase Signaling	1.37	0.0366	2.449	GTF2I,ITGA3,RELA,RHOA,RHOC,YES1
Telomerase Signaling	1.07	0.0374	NaN	HDAC2,HDAC3,POT1,RB1
Telomere Extension by Telomerase	0.68	0.0667	NaN	POT1
Th1 and Th2 Activation Pathway	0	0.00585	NaN	IL18
Th1 Pathway	0	0.00826	NaN	IL18
Th17 Activation Pathway	0.384	0.022	NaN	IRAK1,RELA
The Visual Cycle	0.572	0.05	NaN	AKR1C3
Thrombin Signaling	0.654	0.024	2.236	ARHGEF2,F2,RELA,RHOA,RHOC
Thyroid Hormone Metabolism II (via Conjugation and/or Degradation)	0.349	0.0263	NaN	SULT1A3/SULT1A4
Tight Junction Signaling	0.578	0.0238	NaN	ARHGEF2,MARK2,RELA,RHOA
TNFR1 Signaling	1.37	0.06	NaN	CHUK,CYCS,RELA
TNFR2 Signaling	1.11	0.0667	NaN	CHUK,RELA
Toll-like Receptor Signaling	3.75	0.0921	2	CHUK,EIF2AK2,IL18,IRAK1,RELA,TOLLIP,UBB
TR/RXR Activation	4.32	0.0952	NaN	ACACA,AKR1C1/AKR1C2,AKR1C3,HDAC3,NCOA3,NCOA6,NCOR1,NCOR2
Transcriptional Regulatory Network in Embryonic Stem Cells	0.244	0.0185	NaN	TRIM24
TREM1 Signaling	0.955	0.04	NaN	IL18,IRAK1,RELA
tRNA Charging	0.34	0.0256	NaN	HARS1
Tryptophan Degradation III (Eukaryotic)	0.52	0.0435	NaN	HADHB
Tryptophan Degradation X (Mammalian, via Tryptamine)	1.24	0.08	NaN	ALDH3A1,ALDH3B1
Tumoricidal Function of Hepatic Natural Killer Cells	0.504	0.0417	NaN	CYCS
TWEAK Signaling	1.77	0.0857	NaN	CHUK,CYCS,RELA
Type I Diabetes Mellitus Signaling	1.53	0.045	1.342	CHUK,CYCS,IRAK1,PIAS1,RELA
Type II Diabetes Mellitus Signaling	0	0.0141	NaN	CHUK,RELA
Tyrosine Degradation I	1.12	0.2	NaN	HGD
Unfolded protein response	0.668	0.0357	NaN	HSPA1A/HSPA1B,HSPA2
Urate Biosynthesis/Inosine 5'-phosphate Degradation	0.735	0.0769	NaN	PNP
Uridine-5'-phosphate Biosynthesis	1.51	0.5	NaN	UMPS
UVA-Induced MAPK Signaling	1.18	0.0408	NaN	CYCS,PARP12,PARP14,PARP9
Valine Degradation I	0.611	0.0556	NaN	HADHB
VDR/RXR Activation	1.48	0.0513	-1	NCOA3,NCOR1,NCOR2,SERPINB1
VEGF Signaling	0	0.0101	NaN	ELAVL1
Virus Entry via Endocytic Pathways	0.636	0.028	NaN	AP2A1,AP3M1,ITGA3
Vitamin-C Transport	0.504	0.0417	NaN	GLRX
Wnt/Ca+ pathway	0.207	0.0161	NaN	RELA
Wnt/Î²-catenin Signaling	0.298	0.0173	NaN	CSNK1A1,MARK2,UBB
Xanthine and Xanthosine Salvage	1.81	1	NaN	PNP
Xenobiotic Metabolism CAR Signaling Pathway	0.767	0.0265	2.236	ALDH3A1,ALDH3B1,DNAJC7,RACK1,SULT1A3/SULT1A4
Xenobiotic Metabolism General Signaling Pathway	0	0.014	NaN	FTL,NQO1
Xenobiotic Metabolism PXR Signaling Pathway	1.98	0.0417	0	ALDH3A1,ALDH3B1,CAT,CDK5,DNAJC7,NCOR1,NCOR2,SULT1A3/SULT1A4
Xenobiotic Metabolism Signaling	1.45	0.0314	NaN	ALDH3A1,ALDH3B1,CAT,DNAJC7,FTL,NCOR2,NQO1,RELA,SULT1A3/SULT1A4

## Sheet: NA + LPS + LPSMS275 Common
4-1BB Signaling in T Lymphocytes
Actin Cytoskeleton Signaling
Actin Nucleation by ARP-WASP Complex
Activation of IRF by Cytosolic Pattern Recognition Receptors
Acute Myeloid Leukemia Signaling
Acute Phase Response Signaling
Acyl-CoA Hydrolysis
Adenine and Adenosine Salvage I
Adenine and Adenosine Salvage III
Adenosine Nucleotides Degradation II
Adipogenesis pathway
Adrenomedullin signaling pathway
Agranulocyte Adhesion and Diapedesis
Agrin Interactions at Neuromuscular Junction
Aldosterone Signaling in Epithelial Cells
Altered T Cell and B Cell Signaling in Rheumatoid Arthritis
AMPK Signaling
Amyloid Processing
Amyotrophic Lateral Sclerosis Signaling
Androgen Biosynthesis
Androgen Signaling
Angiopoietin Signaling
Antioxidant Action of Vitamin C
Antiproliferative Role of TOB in T Cell Signaling
Apelin Adipocyte Signaling Pathway
Apelin Cardiomyocyte Signaling Pathway
Apelin Endothelial Signaling Pathway
Apelin Pancreas Signaling Pathway
Apoptosis Signaling
April Mediated Signaling
Arsenate Detoxification I (Glutaredoxin)
Aryl Hydrocarbon Receptor Signaling
Ascorbate Recycling (Cytosolic)
Atherosclerosis Signaling
ATM Signaling
Axonal Guidance Signaling
BAG2 Signaling Pathway
B Cell Activating Factor Signaling
B Cell Receptor Signaling
BER pathway
BEX2 Signaling Pathway
Bile Acid Biosynthesis, Neutral Pathway
Biotin-carboxyl Carrier Protein Assembly
Bladder Cancer Signaling
BMP signaling pathway
Breast Cancer Regulation by Stathmin1
Calcium-induced T Lymphocyte Apoptosis
Calcium Signaling
Cardiac Hypertrophy Signaling
Cardiac Hypertrophy Signaling (Enhanced)
Caveolar-mediated Endocytosis Signaling
CCR3 Signaling in Eosinophils
CD27 Signaling in Lymphocytes
CD28 Signaling in T Helper Cells
CD40 Signaling
Cdc42 Signaling
CDK5 Signaling
Cell Cycle Control of Chromosomal Replication
Cell Cycle: G1/S Checkpoint Regulation
Cell Cycle: G2/M DNA Damage Checkpoint Regulation
Cell Cycle Regulation by BTG Family Proteins
Cellular Effects of Sildenafil (Viagra)
Ceramide Signaling
Chemokine Signaling
Cholecystokinin/Gastrin-mediated Signaling
Chronic Myeloid Leukemia Signaling
Clathrin-mediated Endocytosis Signaling
Coagulation System
Colorectal Cancer Metastasis Signaling
Communication between Innate and Adaptive Immune Cells
Crosstalk between Dendritic Cells and Natural Killer Cells
CTLA4 Signaling in Cytotoxic T Lymphocytes
CXCR4 Signaling
Cyclins and Cell Cycle Regulation
Cysteine Biosynthesis III (mammalia)
Cytotoxic T Lymphocyte-mediated Apoptosis of Target Cells
Death Receptor Signaling
Dendritic Cell Maturation
DNA Double-Strand Break Repair by Homologous Recombination
DNA Methylation and Transcriptional Repression Signaling
Docosahexaenoic Acid (DHA) Signaling
Dopamine-DARPP32 Feedback in cAMP Signaling
Dopamine Degradation
Eicosanoid Signaling
Endocannabinoid Cancer Inhibition Pathway
Endocannabinoid Developing Neuron Pathway
eNOS Signaling
Ephrin A Signaling
Ephrin B Signaling
Ephrin Receptor Signaling
Epithelial Adherens Junction Signaling
ERK/MAPK Signaling
Erythropoietin Signaling
Estrogen Biosynthesis
Estrogen-Dependent Breast Cancer Signaling
Estrogen-mediated S-phase Entry
Estrogen Receptor Signaling
Ethanol Degradation II
Ethanol Degradation IV
Eumelanin Biosynthesis
Extrinsic Prothrombin Activation Pathway
Factors Promoting Cardiogenesis in Vertebrates
FAK Signaling
FAT10 Cancer Signaling Pathway
FAT10 Signaling Pathway
fMLP Signaling in Neutrophils
FXR/RXR Activation
GABA Receptor Signaling
GADD45 Signaling
Gap Junction Signaling
Germ Cell-Sertoli Cell Junction Signaling
Glioblastoma Multiforme Signaling
Glioma Invasiveness Signaling
Glioma Signaling
Glucocorticoid Receptor Signaling
Gluconeogenesis I
Glutaryl-CoA Degradation
Glutathione Redox Reactions I
Glutathione Redox Reactions II
Glycerol-3-phosphate Shuttle
Glycerol Degradation I
Glycolysis I
GM-CSF Signaling
GNRH Signaling
G-Protein Coupled Receptor Signaling
Graft-versus-Host Disease Signaling
Granulocyte Adhesion and Diapedesis
Granzyme A Signaling
Granzyme B Signaling
Guanine and Guanosine Salvage I
Guanosine Nucleotides Degradation III
Heme Degradation
Hepatic Cholestasis
Hepatic Fibrosis / Hepatic Stellate Cell Activation
Hepatic Fibrosis Signaling Pathway
Hereditary Breast Cancer Signaling
HGF Signaling
Histamine Degradation
Histidine Degradation III
Histidine Degradation VI
HMGB1 Signaling
HOTAIR Regulatory Pathway
Huntington's Disease Signaling
Hypoxia Signaling in the Cardiovascular System
iCOS-iCOSL Signaling in T Helper Cells
IGF-1 Signaling
IL-10 Signaling
IL-12 Signaling and Production in Macrophages
IL-15 Production
IL-15 Signaling
IL-17A Signaling in Airway Cells
IL-17A Signaling in Fibroblasts
IL-17A Signaling in Gastric Cells
IL-17 Signaling
IL-1 Signaling
IL-23 Signaling Pathway
IL-6 Signaling
IL-8 Signaling
IL-9 Signaling
ILK Signaling
Induction of Apoptosis by HIV1
Inflammasome pathway
Inhibition of ARE-Mediated mRNA Degradation Pathway
Inosine-5'-phosphate Biosynthesis II
iNOS Signaling
Integrin Signaling
Interferon Signaling
Intrinsic Prothrombin Activation Pathway
Iron homeostasis signaling pathway
Isoleucine Degradation I
JAK/Stat Signaling
Ketogenesis
Ketolysis
Leukocyte Extravasation Signaling
Lipid Antigen Presentation by CD1
LPS/IL-1 Mediated Inhibition of RXR Function
LPS-stimulated MAPK Signaling
LXR/RXR Activation
Macropinocytosis Signaling
Methionine Degradation I (to Homocysteine)
Methylglyoxal Degradation III
Mevalonate Pathway I
MIF-mediated Glucocorticoid Regulation
MIF Regulation of Innate Immunity
Mismatch Repair in Eukaryotes
Mitochondrial Dysfunction
Mitotic Roles of Polo-Like Kinase
Molecular Mechanisms of Cancer
mTOR Signaling
Myc Mediated Apoptosis Signaling
Natural Killer Cell Signaling
Necroptosis Signaling Pathway
NER Pathway
Neuregulin Signaling
Neuroinflammation Signaling Pathway
NGF Signaling
Noradrenaline and Adrenaline Degradation
NRF2-mediated Oxidative Stress Response
Nur77 Signaling in T Lymphocytes
Opioid Signaling Pathway
Osteoarthritis Pathway
Ovarian Cancer Signaling
OX40 Signaling Pathway
Oxidative Ethanol Degradation III
Oxidative Phosphorylation
P2Y Purigenic Receptor Signaling Pathway
p38 MAPK Signaling
p53 Signaling
p70S6K Signaling
PAK Signaling
Pancreatic Adenocarcinoma Signaling
Parkinson's Signaling
Paxillin Signaling
PCP pathway
PDGF Signaling
PEDF Signaling
PFKFB4 Signaling Pathway
Phagosome Formation
Phospholipase C Signaling
PI3K/AKT Signaling
PI3K Signaling in B Lymphocytes
Polyamine Regulation in Colon Cancer
PPAR Signaling
Production of Nitric Oxide and Reactive Oxygen Species in Macrophages
Prostate Cancer Signaling
Protein Kinase A Signaling
Protein Ubiquitination Pathway
PTEN Signaling
Purine Nucleotides Degradation II (Aerobic)
Purine Nucleotides De Novo Biosynthesis II
Purine Ribonucleosides Degradation to Ribose-1-phosphate
Putrescine Degradation III
PXR/RXR Activation
Pyridoxal 5'-phosphate Salvage Pathway
Pyrimidine Deoxyribonucleotides De Novo Biosynthesis I
Pyrimidine Ribonucleotides De Novo Biosynthesis
Rac Signaling
RANK Signaling in Osteoclasts
RAR Activation
Reelin Signaling in Neurons
Regulation of Actin-based Motility by Rho
Regulation of Cellular Mechanics by Calpain Protease
Regulation of eIF4 and p70S6K Signaling
Regulation of IL-2 Expression in Activated and Anergic T Lymphocytes
Regulation of the Epithelial-Mesenchymal Transition Pathway
Relaxin Signaling
Remodeling of Epithelial Adherens Junctions
Renal Cell Carcinoma Signaling
Renin-Angiotensin Signaling
Retinoate Biosynthesis I
Retinoic acid Mediated Apoptosis Signaling
Retinol Biosynthesis
RhoA Signaling
RhoGDI Signaling
Role of BRCA1 in DNA Damage Response
Role of CHK Proteins in Cell Cycle Checkpoint Control
Role of Cytokines in Mediating Communication between Immune Cells
Role of Hypercytokinemia/hyperchemokinemia in the Pathogenesis of Influenza
Role of IL-17A in Arthritis
Role of IL-17A in Psoriasis
Role of IL-17F in Allergic Inflammatory Airway Diseases
Role of JAK1, JAK2 and TYK2 in Interferon Signaling
Role of Macrophages, Fibroblasts and Endothelial Cells in Rheumatoid Arthritis
Role of NFAT in Cardiac Hypertrophy
Role of NFAT in Regulation of the Immune Response
Role of Oct4 in Mammalian Embryonic Stem Cell Pluripotency
Role of Osteoblasts, Osteoclasts and Chondrocytes in Rheumatoid Arthritis
Role of p14/p19ARF in Tumor Suppression
Role of Pattern Recognition Receptors in Recognition of Bacteria and Viruses
Role of PI3K/AKT Signaling in the Pathogenesis of Influenza
Role of PKR in Interferon Induction and Antiviral Response
Role of RIG1-like Receptors in Antiviral Innate Immunity
Role of Tissue Factor in Cancer
Salvage Pathways of Pyrimidine Ribonucleotides
Semaphorin Signaling in Neurons
Senescence Pathway
Serotonin Degradation
Sertoli Cell-Sertoli Cell Junction Signaling
Signaling by Rho Family GTPases
Sirtuin Signaling Pathway
Small Cell Lung Cancer Signaling
Sonic Hedgehog Signaling
Sperm Motility
Sphingosine-1-phosphate Signaling
Stearate Biosynthesis I (Animals)
Sucrose Degradation V (Mammalian)
Sumoylation Pathway
Superoxide Radicals Degradation
Superpathway of Cholesterol Biosynthesis
Superpathway of Geranylgeranyldiphosphate Biosynthesis I (via Mevalonate)
Superpathway of Methionine Degradation
Superpathway of Serine and Glycine Biosynthesis I
Synaptogenesis Signaling Pathway
Systemic Lupus Erythematosus In B Cell Signaling Pathway
Systemic Lupus Erythematosus In T Cell Signaling Pathway
Systemic Lupus Erythematosus Signaling
TCA Cycle II (Eukaryotic)
T Cell Receptor Signaling
Tec Kinase Signaling
Telomerase Signaling
Th17 Activation Pathway
Th1 and Th2 Activation Pathway
Th1 Pathway
T Helper Cell Differentiation
The Visual Cycle
Thrombin Signaling
Tight Junction Signaling
TNFR1 Signaling
TNFR2 Signaling
Toll-like Receptor Signaling
Transcriptional Regulatory Network in Embryonic Stem Cells
TREM1 Signaling
tRNA Charging
TR/RXR Activation
Tryptophan Degradation III (Eukaryotic)
Tryptophan Degradation X (Mammalian, via Tryptamine)
Tumoricidal Function of Hepatic Natural Killer Cells
TWEAK Signaling
Type I Diabetes Mellitus Signaling
Type II Diabetes Mellitus Signaling
Unfolded protein response
Urate Biosynthesis/Inosine 5'-phosphate Degradation
Uridine-5'-phosphate Biosynthesis
UVA-Induced MAPK Signaling
Valine Degradation I
VDR/RXR Activation
VEGF Signaling
Virus Entry via Endocytic Pathways
Vitamin-C Transport
Wnt/Ca+ pathway
Xanthine and Xanthosine Salvage
Xenobiotic Metabolism CAR Signaling Pathway
Xenobiotic Metabolism General Signaling Pathway
Xenobiotic Metabolism PXR Signaling Pathway
Xenobiotic Metabolism Signaling

## Sheet: NA + LPS Unique
Calcium Transport I
Glutathione-mediated Detoxification
GDP-glucose Biosynthesis
S-adenosyl-L-methionine Biosynthesis
Cholesterol Biosynthesis II (via 24,25-dihydrolanosterol)
Neuropathic Pain Signaling In Dorsal Horn Neurons
Phenylethylamine Degradation I
Synaptic Long Term Potentiation
Mechanisms of Viral Exit from Host Cells
Pyruvate Fermentation to Lactate
Methylmalonyl Pathway
CNTF Signaling
Basal Cell Carcinoma Signaling
NF-ÎºB Signaling
Antigen Presentation Pathway
HER-2 Signaling in Breast Cancer
Î³-glutamyl Cycle
NADH Repair
Glycine Cleavage Complex
GP6 Signaling Pathway
UDP-N-acetyl-D-galactosamine Biosynthesis II
Pyrimidine Ribonucleotides Interconversion
DNA damage-induced 14-3-3Ïƒ Signaling
Mouse Embryonic Stem Cell Pluripotency
Pentose Phosphate Pathway
Superpathway of Inositol Phosphate Compounds
Urea Cycle
Leukotriene Biosynthesis
Colanic Acid Building Blocks Biosynthesis
Glycine Betaine Degradation
3-phosphoinositide Degradation
Glycogen Biosynthesis II (from UDP-D-Glucose)
Glutamate Biosynthesis II
Autoimmune Thyroid Disease Signaling
Apelin Cardiac Fibroblast Signaling Pathway
Î³-linolenate Biosynthesis II (Animals)
Fatty Acid Activation
Arginine Degradation VI (Arginase 2 Pathway)
Glycine Biosynthesis I
Glutamine Degradation I
D-myo-inositol-5-phosphate Metabolism
Lymphotoxin Î² Receptor Signaling
N-acetylglucosamine Degradation I
SAPK/JNK Signaling
Cleavage and Polyadenylation of Pre-mRNA
GPCR-Mediated Integration of Enteroendocrine Signaling Exemplified by an L Cell
2-oxobutanoate Degradation I
5-aminoimidazole Ribonucleotide Biosynthesis I
HIPPO signaling
Tryptophan Degradation to 2-amino-3-carboxymuconate Semialdehyde
D-myo-inositol (1,4,5,6)-Tetrakisphosphate Biosynthesis
Inhibition of Angiogenesis by TSP1
Glucose and Glucose-1-phosphate Degradation
PPARÎ±/RXRÎ± Activation
T Cell Exhaustion Signaling Pathway
PD-1, PD-L1 cancer immunotherapy pathway
Î±-Adrenergic Signaling
Nitric Oxide Signaling in the Cardiovascular System
Neurotrophin/TRK Signaling
NAD Biosynthesis III
Cholesterol Biosynthesis I
Branched-chain Î±-keto acid Dehydrogenase Complex
MSP-RON Signaling Pathway
Endocannabinoid Neuronal Synapse Pathway
14-3-3-mediated Signaling
FGF Signaling
Endoplasmic Reticulum Stress Pathway
HIF1Î± Signaling
Human Embryonic Stem Cell Pluripotency
Pentose Phosphate Pathway (Non-oxidative Branch)
GÎ±s Signaling
Superpathway of Citrulline Metabolism
Corticotropin Releasing Hormone Signaling
Glutamate Degradation X
Leucine Degradation I
cAMP-mediated signaling
Proline Biosynthesis I
Cardiac Î²-adrenergic Signaling
Leptin Signaling in Obesity
Trehalose Degradation II (Trehalase)
Gustation Pathway
N-acetylglucosamine Degradation II
FLT3 Signaling in Hematopoietic Progenitor Cells
Role of Wnt/GSK-3Î² Signaling in the Pathogenesis of Influenza
Melatonin Signaling
Citrulline Biosynthesis
Aspartate Biosynthesis
Netrin Signaling
Antiproliferative Role of Somatostatin Receptor 2
2-ketoglutarate Dehydrogenase Complex
Fatty Acid Î±-oxidation
Dermatan Sulfate Degradation (Metazoa)
SPINK1 General Cancer Pathway
Cholesterol Biosynthesis III (via Desmosterol)
Glutamate Receptor Signaling
IL-7 Signaling Pathway
GÎ±i Signaling
Phenylalanine Degradation IV (Mammalian, via Side Chain)
CCR5 Signaling in Macrophages
Synaptic Long Term Depression
G Protein Signaling Mediated by Tubby
Mitochondrial L-carnitine Shuttle Pathway
GÎ±q Signaling
Acetyl-CoA Biosynthesis I (Pyruvate Dehydrogenase Complex)
Folate Transformations I
IL-4 Signaling
tRNA Splicing
B Cell Development
TGF-Î² Signaling
Folate Polyglutamylation
Autophagy
CREB Signaling in Neurons
GPCR-Mediated Nutrient Sensing in Enteroendocrine Cells
nNOS Signaling in Neurons
Maturity Onset Diabetes of Young (MODY) Signaling
PKCÎ¸ Signaling in T Lymphocytes
G Beta Gamma Signaling
NAD Salvage Pathway II
Triacylglycerol Biosynthesis
Allograft Rejection Signaling
FcÎ³ Receptor-mediated Phagocytosis in Macrophages and Monocytes
Insulin Receptor Signaling
Glutamate Degradation II
3-phosphoinositide Biosynthesis
UVB-Induced MAPK Signaling
Inhibition of Matrix Metalloproteases
Fc Epsilon RI Signaling
L-cysteine Degradation I
D-myo-inositol (3,4,5,6)-tetrakisphosphate Biosynthesis
Pentose Phosphate Pathway (Oxidative Branch)
ERK5 Signaling
Arginine Degradation I (Arginase Pathway)
Primary Immunodeficiency Signaling
Phagosome Maturation
Phospholipases
EIF2 Signaling
EGF Signaling
NAD biosynthesis II (from tryptophan)
Fatty Acid Î²-oxidation I
ErbB Signaling
Aspartate Degradation II
IL-3 Signaling
SPINK1 Pancreatic Cancer Pathway
Tetrahydrofolate Salvage from 5,10-methenyltetrahydrofolate
Th2 Pathway
Glutathione Biosynthesis
Dopamine Receptor Signaling
White Adipose Tissue Browning Pathway
STAT3 Pathway
Glutamate Removal from Folates
Endothelin-1 Signaling
Role of NANOG in Mammalian Embryonic Stem Cell Pluripotency
GÎ±12/13 Signaling
Thyroid Cancer Signaling
GDP-mannose Biosynthesis
dTMP De Novo Biosynthesis
Neuroprotective Role of THOP1 in Alzheimer's Disease
Wnt/Î²-catenin Signaling
RAN Signaling
Chondroitin Sulfate Degradation (Metazoa)
Assembly of RNA Polymerase II Complex
GDNF Family Ligand-Receptor Interactions
NF-ÎºB Activation by Viruses
Arginine Biosynthesis IV

## Sheet: NA + LPS_MS275 Unique
Telomere Extension by Telomerase
Serine Biosynthesis
Formaldehyde Oxidation II (Glutathione-dependent)

## Sheet: NA Unique
Dolichyl-diphosphooligosaccharide Biosynthesis
UVC-Induced MAPK Signaling
Lactose Degradation III
Cancer Drug Resistance By Drug Efflux

## Sheet: LPS Unique
Apelin Liver Signaling Pathway
Coenzyme A Biosynthesis
Asparagine Biosynthesis I
IL-2 Signaling
Role of MAPK Signaling in the Pathogenesis of Influenza
CDP-diacylglycerol Biosynthesis I
Phosphatidylglycerol Biosynthesis II (Non-plastidic)
ErbB2-ErbB3 Signaling
Glycogen Degradation III
Glycogen Degradation II
Nucleotide Excision Repair Pathway
Triacylglycerol Degradation

## Sheet: LPS_MS275 Unique
NF-ÃŽÂºB Signaling
Heparan Sulfate Biosynthesis (Late Stages)
FcÃŽÂ³ Receptor-mediated Phagocytosis in Macrophages and Monocytes
PKCÃŽÂ¸ Signaling in T Lymphocytes
Wnt/ÃŽÂ²-catenin Signaling
GÃŽÂ±q Signaling
Complement System
Fatty Acid ÃŽÂ²-oxidation I
Superpathway of Melatonin Degradation
Heparan Sulfate Biosynthesis
GÃŽÂ±12/13 Signaling
Melatonin Degradation I
Role of Wnt/GSK-3ÃŽÂ² Signaling in the Pathogenesis of Influenza
Melanoma Signaling
Dermatan Sulfate Biosynthesis
Non-Small Cell Lung Cancer Signaling
DNA damage-induced 14-3-3ÃÆ’ Signaling
Tyrosine Degradation I
Thyroid Hormone Metabolism II (via Conjugation and/or Degradation)
Lymphotoxin ÃŽÂ² Receptor Signaling
Chondroitin Sulfate Biosynthesis (Late Stages)
ï»¿EIF2 Signaling
Fatty Acid ÃŽÂ±-oxidation
NF-ÃŽÂºB Activation by Viruses
PPARÃŽÂ±/RXRÃŽÂ± Activation
Dermatan Sulfate Biosynthesis (Late Stages)
Chondroitin Sulfate Biosynthesis
