# Supplementary material for: Histone Deacetylase 3 Associates With Key Regulators of NFκB Signaling in Lung Epithelial Cells Under Stimulation With LPS.
Source: Research Square preprint supplement (doi:10.21203/rs.3.rs-674720/v1), 2021-07-07
Supplement: Supplementary file 3 [file ba69a5119214ce5a03b9732b.xlsx]

## Sheet: Table 6 HDAC3_LPS_MS275_v_Cont
Accession	Description	Peptides	52655 Control	52656 Control	5257 Control	52646 HDAC3_NA	52647 HDAC3_NA	52648 HDAC3_NA	52649 HDAC3_LPS	52650 HDAC3_LPS	52651 HDAC3_LPS	52652 HDAC3_LPS_MS275	52653 HDAC3_LPS_MS275	52654 HDAC3_LPS_MS275	52658 QCPool	52658 QCPool.1	52658 QCPool.2	52655 Control Normalized	52656 Control Normalized	5257 Control Normalized	52646 HDAC3_NA Normalized	52647 HDAC3_NA Normalized	52648 HDAC3_NA Normalized	52649 HDAC3_LPS Normalized	52650 HDAC3_LPS Normalized	52651 HDAC3_LPS Normalized	52652 HDAC3_LPS_MS275 Normalized	52653 HDAC3_LPS_MS275 Normalized	52654 HDAC3_LPS_MS275 Normalized	52658 QCPool Normalized	52658 QCPool Normalized.1	52658 QCPool Normalized.2	Control_CV	HDAC3_NA_CV	HDAC3_LPS_CV	HDAC3_LPS_MS275_CV	QCPool_CV	HDAC3_NA_v_Control_FC	HDAC3_NA_v_Control_Pval	HDAC3_LPS_v_Control_FC	HDAC3_LPS_v_Control_Pval	HDAC3_LPS_MS275_v_Control_FC	HDAC3_LPS_MS275_v_Control_Pval	Unique
A0AV96	RNA-binding protein 47 OS=Homo sapiens OX=9606 GN=RBM47 PE=1 SV=2	11	800055	872731	1.00027e+06	809142	932647	487198	939426	726060	842919	3.07445e+06	3.31673e+06	3.50738e+06	1.39109e+06	1.34543e+06	1.49453e+06	440459	399894	440509	1.76802e+06	2.06996e+06	1.78004e+06	1.91971e+06	1.51806e+06	1.63123e+06	2.21407e+06	2.50349e+06	2.35754e+06	1.12795e+06	1.25721e+06	1.31689e+06	5.49	9.13	12.3	6.14	7.83	4.39	6.78e-05	3.96	0.00054	5.52	4.04e-06
A6ND36	Protein FAM83G OS=Homo sapiens OX=9606 GN=FAM83G PE=1 SV=2	4	175986	398749	264973	69510	9029.08	0	42576.6	69409.3	75193.5	313012	400094	427934	214071	276445	285174	107367	131833	121050	191746	57190.6	90721	103912	321670	203431	238405	301994	287643	174571	250193	251280	10.2	61.9	52	12.1	19.5	-1.06	0.66	1.75	0.295	2.3	0.00104	Yes
A8K2U0	Alpha-2-macroglobulin-like protein 1 OS=Homo sapiens OX=9606 GN=A2ML1 PE=1 SV=3	5	1.95199e+06	4.41888e+06	4.43458e+06	2.19517e+06	3.12789e+06	4.30043e+06	3.23352e+06	3.75065e+06	3604558	6.8386e+06	7.47213e+06	6.31702e+06	7.03501e+06	3.60218e+06	3.29236e+06	1.00778e+06	1.99487e+06	1.7837e+06	4.89957e+06	7.06318e+06	9.20605e+06	6.58487e+06	7.20043e+06	7.04001e+06	4.94812e+06	5.65023e+06	4.2592e+06	5.59348e+06	3.23919e+06	2.92166e+06	32.6	30.5	4.6	14	37.3	4.42	0.00624	4.35	0.0177	3.1	0.0203
O00154	Cytosolic acyl coenzyme A thioester hydrolase OS=Homo sapiens OX=9606 GN=ACOT7 PE=1 SV=3	3	341704	297977	351589	444341	246848	539963	579075	206528	564290	632140	313397	379528	352637	309163	324835	201129	133556	140871	961441	607495	1.15591e+06	1.1788e+06	532052	1.08285e+06	455236	290736	255106	287664	280091	288304	23.4	30.6	37.5	32	1.6	5.73	0.00283	5.87	0.00904	2.11	0.0324
O00425	Insulin-like growth factor 2 mRNA-binding protein 3 OS=Homo sapiens OX=9606 GN=IGF2BP3 PE=1 SV=2	22	7.93765e+06	9.48246e+06	1.10751e+07	4.66325e+06	4.58582e+06	3.8395e+06	3.92817e+06	4.47146e+06	4.56078e+06	1.32072e+07	1.32493e+07	1.51846e+07	8.56233e+06	7.17353e+06	7.60923e+06	4.28825e+06	4.27278e+06	4.47718e+06	1.01073e+07	9.99262e+06	9.00636e+06	8.44972e+06	8.63713e+06	8.816e+06	9.78562e+06	1.03854e+07	1.02205e+07	6.80818e+06	7.03071e+06	6.87058e+06	2.62	6.24	2.12	3.06	1.66	2.23	0.000557	1.99	5.57e-06	2.33	4.49e-06
O00622	CCN family member 1 OS=Homo sapiens OX=9606 GN=CCN1 PE=1 SV=1	4	364111	376726	423162	221821	184208	107020	239205	120933	147652	1.12916e+06	1.07128e+06	1.0034e+06	541229	478176	475800	185472	191833	169548	483636	411908	257978	502934	274714	290199	813163	808608	674451	429895	427814	419248	6.3	30	35.8	10.3	1.33	2.11	0.0583	1.95	0.0773	4.2	0.000155	Yes
O00763	Acetyl-CoA carboxylase 2 OS=Homo sapiens OX=9606 GN=ACACB PE=1 SV=3	41	1.90927e+07	2.09951e+07	3.01799e+07	5.57866e+07	6.13187e+07	5.83922e+07	5.06058e+07	6.09529e+07	5.90265e+07	4.15516e+07	4.4391e+07	4.75894e+07	4.44421e+07	4.28965e+07	4.00398e+07	9.81983e+06	9.4518e+06	1.01605e+07	1.20798e+08	1.33707e+08	1.10867e+08	1.2e+08	1.17302e+08	1.13107e+08	3.01363e+07	3.35275e+07	3.19975e+07	3.54422e+07	3.84465e+07	4.2915e+07	3.61	9.4	2.97	5.33	9.66	12.4	9.09e-05	11.9	1.38e-07	3.25	1.92e-05
O14744	Protein arginine N-methyltransferase 5 OS=Homo sapiens OX=9606 GN=PRMT5 PE=1 SV=4	3	65055.6	389493	316473	302760	272363	265215	441117	408888	451317	345339	381621	534197	299128	288270	345718	100906	191261	168115	655095	603251	594114	897965	783538	866062	315486	288051	359069	237595	326123	304628	30.6	5.33	6.95	11.2	16	4.02	0.0164	5.53	0.00985	2.09	0.0475
O14818	Proteasome subunit alpha type-7 OS=Homo sapiens OX=9606 GN=PSMA7 PE=1 SV=1	5	321990	585062	455525	76846.6	246712	413236	302352	717933	312908	759873	821528	1.29152e+06	368424	542341	642634	178012	272865	250218	678395	582103	888425	630092	975833	614638	547223	620096	868113	570513	485221	566254	21.2	21.9	27.6	24.8	8.89	3.07	0.00339	3.17	0.00478	2.9	0.00503
O14828	Secretory carrier-associated membrane protein 3 OS=Homo sapiens OX=9606 GN=SCAMP3 PE=1 SV=3	3	413725	490414	258740	717595	373957	1.40145e+06	544871	245417	378956	1.03934e+06	638395	705961	478345	787836	241310	210291	220609	285110	1.55269e+06	813256	3.00013e+06	1.10917e+06	779199	727204	748484	481865	474522	390937	421012	355887	17	62.2	23.8	27.5	8.37	7.49	0.0314	3.65	0.00196	2.38	0.0128
O15111	Inhibitor of nuclear factor kappa-B kinase subunit alpha OS=Homo sapiens OX=9606 GN=CHUK PE=1 SV=2	1	91638	72368.4	0	0	0	0	0	0	0	0	127036	123520	54066.4	0	45501.2	46204.6	32436.1	51886.8	22305.8	3209.26	6278.87	2840.74	2855.49	17932.5	94382.3	95887.5	83026	42944.5	45177.3	40093.2	23	96.8	111	7.72	5.96	-4.11	0.0865	-5.52	0.0694	2.09	0.0244	Yes
O15143	Actin-related protein 2/3 complex subunit 1B OS=Homo sapiens OX=9606 GN=ARPC1B PE=1 SV=3	5	717121	840025	665065	431275	694650	632481	611249	739388	550982	1.20253e+06	1.15551e+06	1.02595e+06	566800	623870	659842	361578	383977	383261	937446	1.51068e+06	1.36304e+06	1.24978e+06	1.41915e+06	1.08728e+06	866005	872185	792088	453138	561653	596952	3.38	23.4	13.3	5.28	14	3.38	0.0131	3.33	0.00257	2.24	8.91e-05
O15164	Transcription intermediary factor 1-alpha OS=Homo sapiens OX=9606 GN=TRIM24 PE=1 SV=3	5	266483	439174	289880	111755	253725	135884	177717	126339	209893	535411	685167	701586	517707	310158	327002	139316	201865	167178	407863	553664	296488	378326	497803	420981	385576	517169	471582	411211	295858	288136	18.5	30.8	14	14.6	20.8	2.47	0.0206	2.55	0.00285	2.7	0.00226
O15226	NF-kappa-B-repressing factor OS=Homo sapiens OX=9606 GN=NKRF PE=1 SV=2	16	3.1314e+06	2.42929e+06	3.92419e+06	1.01488e+06	1.08801e+06	585059	595591	979218	950118	4.24236e+06	5.12394e+06	5.21191e+06	2.10221e+06	2.43576e+06	2.14663e+06	1.71675e+06	1.10264e+06	1.66064e+06	2.22704e+06	2.37869e+06	2.6735e+06	1.43565e+06	1.73007e+06	1.7667e+06	3.05514e+06	3.94372e+06	3.72112e+06	1.72783e+06	2.1265e+06	1.897e+06	22.7	9.36	11	12.9	10.4	1.62	0.0577	1.1	0.533	2.39	0.0112	Yes
O15321	Transmembrane 9 superfamily member 1 OS=Homo sapiens OX=9606 GN=TM9SF1 PE=2 SV=2	1	0	0	0	69475.2	0	0	0	59386.3	67884.5	0	47699.1	55357.2	57030.8	0	56602.6	7989.85	9179.59	3917.37	150327	2476.04	7158.13	192003	113800	130268	29068.6	36003.6	37209.2	45299.2	94470.4	49875.1	39.3	158	28.4	12.9	43	7.59	0.611	20.7	0.00149	4.85	0.0184
O15379	Histone deacetylase 3 OS=Homo sapiens OX=9606 GN=HDAC3 PE=1 SV=2	68	1.07635e+08	1.06467e+08	1.2203e+08	1.09329e+09	1.22191e+09	1.12034e+09	1.0731e+09	1.10844e+09	1.28469e+09	4.04345e+09	4.11924e+09	4.56158e+09	1.69923e+09	1.46628e+09	1.50933e+09	5.44145e+07	4.80678e+07	4.93177e+07	2.36622e+09	2.65798e+09	2.39851e+09	2.18469e+09	2.12235e+09	2.46671e+09	2.91811e+09	3.10939e+09	3.06625e+09	1.3499e+09	1.31173e+09	1.33012e+09	6.64	6.46	8.13	3.31	1.43	48.9	2.04e-07	44.6	5.71e-07	59.9	2.71e-06
O43175	D-3-phosphoglycerate dehydrogenase OS=Homo sapiens OX=9606 GN=PHGDH PE=1 SV=4	7	1.72494e+06	1.86041e+06	1.61722e+06	873109	732473	727899	885602	772191	668408	2.68559e+06	2.40661e+06	2.58534e+06	1.69625e+06	1.51977e+06	1.44225e+06	869727	833852	647970	1.88919e+06	1.61974e+06	1.55823e+06	1.84267e+06	1.47972e+06	1.28265e+06	1.93403e+06	1.81652e+06	1.73778e+06	1.34732e+06	1.3597e+06	1.27083e+06	15.2	10.4	18.5	5.4	3.63	2.15	0.00378	1.96	0.00914	2.33	0.00649
O43251	RNA binding protein fox-1 homolog 2 OS=Homo sapiens OX=9606 GN=RBFOX2 PE=1 SV=3	3	21821.3	0	40991.5	35132.7	43206.4	159720	25928.1	216579	139209	355780	167191	511085	0	76297.4	133838	31266.3	16326.6	20664.1	80283.9	104476	377905	396300	434010	276794	258848	347185	343534	97651	78510	120451	33.8	88.1	22.2	15.8	21.2	8.24	0.0433	16.2	0.000469	13.9	0.00117
O43663	Protein regulator of cytokinesis 1 OS=Homo sapiens OX=9606 GN=PRC1 PE=1 SV=2	3	61472.1	156844	0	5.85204e+07	4.17452e+07	164562704	3.00185e+07	6.51434e+07	3.4771e+07	5.78584e+07	3.38494e+07	42758468	55733688	4.62331e+07	53850068	41483.2	71660.4	31218.3	1.26623e+08	9.08099e+07	3.52408e+08	6.11076e+07	1.24832e+08	6.67813e+07	4.16795e+07	2.55585e+07	2.87544e+07	4.42857e+07	4.13638e+07	4.74596e+07	43.7	74.7	41.9	26.7	6.87	3950	0.000258	1750	2.42e-05	665	9.59e-05
O43684	Mitotic checkpoint protein BUB3 OS=Homo sapiens OX=9606 GN=BUB3 PE=1 SV=1	6	369837	427466	453392	209322	191996	233355	553042	476952	663586	721837	570524	884859	419721	411385	559673	188741	195496	285722	489291	599127	734531	1.12922e+06	916098	1.2734e+06	527454	557862	605505	407790	375790	493153	24.2	20.2	16.2	6.98	14.3	2.72	0.00497	4.95	0.000943	2.52	0.0134
O75179	Ankyrin repeat domain-containing protein 17 OS=Homo sapiens OX=9606 GN=ANKRD17 PE=1 SV=3	20	8.50065e+06	1.03528e+07	1.13367e+07	2.39986e+07	3.15896e+07	1.79232e+07	2.33062e+07	2.13816e+07	2.63255e+07	1.31779e+07	2.13427e+07	1.40302e+07	1.88645e+07	1.73084e+07	1.921e+07	4.3426e+06	4.65259e+06	4.54857e+06	5.20162e+07	6.87885e+07	4.06221e+07	4.80575e+07	4.16514e+07	5.05866e+07	9.63212e+06	1.61573e+07	9.4306e+06	1.50139e+07	1.55087e+07	1.69462e+07	3.49	26.3	9.85	32.6	6.34	11.9	0.00334	10.4	0.000172	2.6	0.033
O75330	Hyaluronan mediated motility receptor OS=Homo sapiens OX=9606 GN=HMMR PE=1 SV=2	1	0	30599.8	27871.7	43744.5	28595.6	195275	88013.2	188821	80960.9	192093	182461	225500	142392	27536.4	33021.1	17866.9	13715.1	11167.3	94651.8	62187.6	418031	179165	361830	155361	138336	137723	151573	113101	24636.2	29096.3	23.7	103	48.7	5.49	89.6	13.4	0.0526	16.3	0.00261	10	0.0023
O75342	Arachidonate 12-lipoxygenase, 12R-type OS=Homo sapiens OX=9606 GN=ALOX12B PE=1 SV=1	7	558851	140177	92118.3	535156	260757	275599	363271	874216	198513	792356	358705	554102	538369	269444	521507	220301	81713.4	167336	1.33795e+06	925199	1.32434e+06	960222	1.67523e+06	1.1196e+06	572511	328995	375209	476468	435519	475440	44.7	19.6	30	30.4	5.05	7.64	0.0103	8	0.00704	2.72	0.0498
O75362	Zinc finger protein 217 OS=Homo sapiens OX=9606 GN=ZNF217 PE=1 SV=1	6	228614	240435	203999	0	0	0	200250	0	0	562959	744834	584384	275473	378028	206129	146896	136158	192327	123782	84017.6	56885.1	63899.2	167180	63907.2	458084	562206	481276	237024	366596	196908	18.8	38.1	60.6	10.9	33.2	-1.8	0.0912	-1.61	0.207	3.16	0.00178	Yes
O75376	Nuclear receptor corepressor 1 OS=Homo sapiens OX=9606 GN=NCOR1 PE=1 SV=2	69	1.55975e+07	1.45031e+07	1.56287e+07	2.24647e+07	2.51848e+07	2.0927e+07	1.93219e+07	2.19812e+07	2.38471e+07	2.43861e+07	3.37629e+07	2.856e+07	2.11126e+07	1.88631e+07	1.8779e+07	7.79831e+06	6.6774e+06	6.72425e+06	5.00174e+07	5.50056e+07	4.67105e+07	3.97107e+07	4.20796e+07	4.59109e+07	1.82759e+07	2.60165e+07	1.92851e+07	1.70553e+07	1.74122e+07	1.70343e+07	8.97	8.26	7.35	19.9	1.24	7.16	9.52e-06	6.02	1.42e-05	3	0.00372
O75426	F-box only protein 24 OS=Homo sapiens OX=9606 GN=FBXO24 PE=1 SV=2	1	0	0	0	299037	120528	409149	286101	494936	535667	470171	1.55293e+06	244968	413311	627095	691530	17666.3	9049.05	20111.1	647039	262116	875877	582404	948427	1.02793e+06	338593	1.17216e+06	164659	328290	561048	609338	37.2	52.1	27.9	96.4	30.1	38.1	0.00206	54.6	0.000336	35.8	0.0167
O75569	Interferon-inducible double-stranded RNA-dependent protein kinase activator A OS=Homo sapiens OX=9606 GN=PRKRA PE=1 SV=1	6	378139	469183	527206	228342	263107	362395	108097	278508	171990	1.17807e+06	757331	1.15444e+06	692254	484298	232253	202374	220932	212242	577424	592619	796589	269075	562219	353542	848385	755421	775976	549853	455150	333080	4.38	18.7	38.2	6.16	24.4	3.09	0.00594	1.86	0.114	3.74	1.61e-05
O75592	E3 ubiquitin-protein ligase MYCBP2 OS=Homo sapiens OX=9606 GN=MYCBP2 PE=1 SV=4	3	96608.4	137012	62820.2	0	92176.6	50292.4	43178.9	97248	0	280493	407136	329536	149197	267515	33772.8	54938.9	79164.2	32118.6	207226	213001	119741	106457	196393	23905.5	201997	370457	221502	120963	239340	176369	42.5	29	79.2	34.8	33.1	3.25	0.0236	1.97	0.58	4.78	0.01
O75925	E3 SUMO-protein ligase PIAS1 OS=Homo sapiens OX=9606 GN=PIAS1 PE=1 SV=2	3	265101	47965.9	159922	36945.6	26593.7	0	0	0	0	332478	456221	428302	112174	244368	193725	67998.3	24675.6	91226.9	122715	69756.1	78339.7	25054.7	22748.7	17053.2	239434	344359	365776	98526.9	222081	184502	55.1	31.5	19.1	21.4	37.6	1.47	0.344	-2.84	0.137	5.16	0.0362	Yes
O76039	Cyclin-dependent kinase-like 5 OS=Homo sapiens OX=9606 GN=CDKL5 PE=1 SV=1	2	68469	70805.1	64031.2	72395.1	32561.5	83472.3	147715	83791	111801	172860	198519	162842	179171	56869.5	0	49360.6	41670.1	37770.7	165878	77419	182646	300698	160566	214543	124485	149844	109457	142315	55533.4	57606.8	13.7	39.8	31.4	16	58.1	3.31	0.0437	5.25	0.00531	2.98	0.000909
O94874	E3 UFM1-protein ligase 1 OS=Homo sapiens OX=9606 GN=UFL1 PE=1 SV=2	4	138470	476854	223375	93130.5	30330.7	0	43529.1	331680	126462	515601	502263	779804	330241	130097	199608	81248.6	214550	138220	245203	76822.2	98316.3	134820	223851	279267	371310	379112	524157	262308	208040	203429	46.2	65.4	34.3	20.3	14.6	-1.03	0.856	1.47	0.308	2.94	0.0411	Yes
O94913	Pre-mRNA cleavage complex 2 protein Pcf11 OS=Homo sapiens OX=9606 GN=PCF11 PE=1 SV=3	13	2.98285e+06	3.39471e+06	3.83158e+06	1.37538e+06	1.42648e+06	1.4413e+06	1.25371e+06	1.17056e+06	1.72898e+06	4.4035e+06	5.08724e+06	5.45797e+06	2.9945e+06	2.18974e+06	2.86744e+06	1.50398e+06	1.53768e+06	1.78378e+06	3.19636e+06	2.9167e+06	3.14807e+06	2.57426e+06	2.31029e+06	3.16268e+06	3.33329e+06	3.83989e+06	3.66866e+06	2.37851e+06	2.14003e+06	2.6434e+06	9.5	4.84	16.3	7.13	10.5	1.92	0.00161	1.67	0.0152	2.25	0.00039	Yes
O95229	ZW10 interactor OS=Homo sapiens OX=9606 GN=ZWINT PE=1 SV=2	2	0	0	386338	0	0	0	0	0	0	175210	74155	215734	49751.9	51365.9	43267.9	11431.6	11885.5	46054.6	17450.3	35916.3	7202.19	32372.6	12893.5	53022.4	126177	152461	145009	50160	49817	39906.6	85.9	72.1	61.3	9.59	12.5	-1.15	0.876	1.42	0.533	6.11	0.0453	Yes
O95235	Kinesin-like protein KIF20A OS=Homo sapiens OX=9606 GN=KIF20A PE=1 SV=1	1	46032	65301.8	0	0	0	0	0	0	0	108610	90931.4	132644	61477.3	90273.1	45768.9	23209.7	29268.8	44170.8	23998.1	21971.6	11210.1	9409.35	19206	2511.65	78215.3	68635.7	89159	48831	80765.4	40329.1	33.5	36.1	80.9	13.1	37.6	-1.69	0.155	-3.1	0.134	2.44	0.0263	Yes
O95758	Polypyrimidine tract-binding protein 3 OS=Homo sapiens OX=9606 GN=PTBP3 PE=1 SV=2	13	1.89445e+06	1.96222e+06	1.48821e+06	1.85339e+06	2.05827e+06	1.83999e+06	1.99132e+06	1.84972e+06	2.02995e+06	5.1069e+06	6.08516e+06	6.09395e+06	3.3427e+06	2.56134e+06	2.92968e+06	957392	897845	1.00996e+06	4.20156e+06	4.47954e+06	3.97881e+06	3.78814e+06	3.5949e+06	3.90151e+06	3.68453e+06	4.6295e+06	4.48412e+06	2.76556e+06	2.36261e+06	2.59954e+06	5.87	5.94	4.12	11.9	7.86	4.42	6.64e-06	3.94	1.37e-05	4.47	0.000429
O95782	AP-2 complex subunit alpha-1 OS=Homo sapiens OX=9606 GN=AP2A1 PE=1 SV=3	5	1.76837e+06	2.07726e+06	2.51093e+06	1.07297e+06	1.46593e+06	846080	957827	1.38781e+06	1.33838e+06	2.60938e+06	3.06853e+06	2.31558e+06	1.92038e+06	1.50842e+06	2.17042e+06	891624	960109	1.00605e+06	2.32163e+06	3.18801e+06	1.90765e+06	1.94981e+06	2.6594e+06	2.56831e+06	1.87915e+06	2.31615e+06	1.8112e+06	1.52534e+06	1.34955e+06	1.91246e+06	6.04	26.4	16.1	13.7	18	2.6	0.0202	2.51	0.00611	2.1	0.00404
O96008	Mitochondrial import receptor subunit TOM40 homolog OS=Homo sapiens OX=9606 GN=TOMM40 PE=1 SV=1	2	158936	182421	157088	64594.4	142083	91435	154120	153695	188887	267749	221845	242295	122210	143305	85781.3	80136.6	81762.4	87261.4	142669	308992	219006	313736	294521	362468	192819	167450	162862	111545	128212	87951.2	4.5	37.2	10.8	9.25	18.5	2.69	0.0502	3.9	0.000514	2.1	0.00122
P00390	Glutathione reductase, mitochondrial OS=Homo sapiens OX=9606 GN=GSR PE=1 SV=2	10	2.10666e+06	2.66153e+06	2.4672e+06	2.97021e+06	3.13476e+06	2.34953e+06	4.22022e+06	3.49077e+06	3.7723e+06	3.12888e+06	3.31018e+06	3.22108e+06	2.84228e+06	2.71546e+06	2.91155e+06	1.06671e+06	1.20115e+06	1.04624e+06	6.42938e+06	7.2388e+06	7.22265e+06	8.81838e+06	6.68924e+06	7.38119e+06	2.31505e+06	2.77788e+06	2.1651e+06	2.28555e+06	2.69421e+06	2.5655e+06	7.62	6.64	14.2	13.2	8.31	6.3	6.53e-06	6.91	0.00021	2.19	0.00216
P00491	Purine nucleoside phosphorylase OS=Homo sapiens OX=9606 GN=PNP PE=1 SV=2	4	109536	352005	0	293107	236755	383515	312397	404650	322725	537548	297779	298538	168164	195141	133046	62305.1	104243	82538.1	638030	518887	883505	641653	814273	646639	387115	239100	228282	173377	186672	137251	25.3	27.3	14	31.2	15.4	8.19	0.000617	8.44	0.00099	3.43	0.00579
P00734	Prothrombin OS=Homo sapiens OX=9606 GN=F2 PE=1 SV=2	2	147915	0	322417	67696.6	0	0	109663	40793.9	92002.3	115033	272668	175438	221960	233165	23703.6	3120.55	8153.41	9383.42	177219	34128.5	19246	223238	189403	261617	183265	242077	117923	189755	208608	38087.4	48.2	113	16.1	34.3	64.3	11.2	0.0705	32.6	0.00617	26.3	0.00263
P00846	ATP synthase subunit a OS=Homo sapiens OX=9606 GN=MT-ATP6 PE=1 SV=1	1	173787	146547	128107	241942	371390	138596	310814	263105	365058	217045	180475	260907	273702	179901	210147	87624.6	65683.8	51328.5	523500	807673	296696	632712	504178	700534	156305	136224	175373	217399	160953	185170	26.8	47.2	16.3	12.6	15.1	7.95	0.00827	8.98	0.000682	2.29	0.0179
P02788	Lactotransferrin OS=Homo sapiens OX=9606 GN=LTF PE=1 SV=6	4	272330	212597	598743	265090	151160	509899	285180	140634	300472	163078	476565	753251	439630	210761	246878	138094	110075	252700	583026	450999	718241	585078	460020	743853	327478	359715	506309	360265	209447	312237	45.3	22.9	23.9	24	26.2	3.5	0.0182	3.57	0.0171	2.38	0.0462
P02792	Ferritin light chain OS=Homo sapiens OX=9606 GN=FTL PE=1 SV=2	4	695422	870520	822628	902018	1.19968e+06	1.33548e+06	1.21378e+06	1626984	1.53055e+06	1.38761e+06	1.39221e+06	1.3435e+06	1.36162e+06	1.13189e+06	956714	366945	394980	331016	1.95174e+06	2.60898e+06	2.85891e+06	2.47084e+06	3.11773e+06	2.93707e+06	999286	1.05085e+06	903052	1.08152e+06	1.01268e+06	843004	8.8	18.9	11.7	7.62	12.5	6.79	0.000971	7.8	3.75e-05	2.7	0.000143
P02794	Ferritin heavy chain OS=Homo sapiens OX=9606 GN=FTH1 PE=1 SV=2	3	476721	687553	594598	815364	804108	789609	572755	777934	863295	1.13024e+06	1.2561e+06	1.19053e+06	892592	662361	763913	240367	308167	238237	1.76424e+06	1.74872e+06	1.69034e+06	1.16593e+06	1.49073e+06	1.65663e+06	813946	948114	800236	708979	592600	673118	15.2	2.25	17.4	9.57	9.05	6.61	0.0016	5.48	0.000285	3.26	0.000699
P03915	NADH-ubiquinone oxidoreductase chain 5 OS=Homo sapiens OX=9606 GN=MT-ND5 PE=1 SV=2	1	137342	146318	130854	154463	131473	262291	171062	206416	203029	210983	161981	191174	146236	114051	145660	69248.7	65580.9	52429.3	334219	285919	561494	348225	395547	389605	151940	122265	128500	116154	102039	128348	14.2	37.4	6.82	11.7	11.4	6.31	0.00577	6.05	0.000423	2.15	0.00256
P04040	Catalase OS=Homo sapiens OX=9606 GN=CAT PE=1 SV=3	8	1.52173e+06	1.58272e+06	480184	1.73256e+06	2.02103e+06	2.81736e+06	1.47018e+06	2.70188e+06	2215916	2.29953e+06	2.1272e+06	3.12868e+06	2.18699e+06	2.16673e+06	2.29646e+06	778532	795491	922518	4.87833e+06	4.53454e+06	6.15448e+06	4.62278e+06	5.17751e+06	4.25227e+06	1.65601e+06	1.60563e+06	2.10299e+06	1.73711e+06	2.06937e+06	2.13117e+06	9.46	16.4	9.94	15.3	10.7	6.24	0.000291	5.63	2.56e-05	2.15	0.00321
P04080	Cystatin-B OS=Homo sapiens OX=9606 GN=CSTB PE=1 SV=2	3	1.20572e+06	1.27526e+06	1.33037e+06	2.56836e+06	2.38183e+06	2.654e+06	2.23703e+06	2.62336e+06	3.51386e+06	1.59488e+06	2.15064e+06	2.0288e+06	1.85677e+06	1.56096e+06	1.93112e+06	607936	571582	533040	5.55728e+06	5.17984e+06	5.68149e+06	4.55384e+06	5.02704e+06	6.74297e+06	1.14856e+06	1.62332e+06	1.36369e+06	1.47482e+06	1.39655e+06	1.70159e+06	6.56	4.77	21.2	17.2	10.4	9.59	2.85e-06	9.53	0.00124	2.41	0.00666
P04792	Heat shock protein beta-1 OS=Homo sapiens OX=9606 GN=HSPB1 PE=1 SV=2	14	5.03225e+06	7.27332e+06	6.86637e+06	5.47215e+06	5.19301e+06	5.45723e+06	5.71014e+06	6.81457e+06	5.54157e+06	1.30993e+07	1.4955e+07	1.5687e+07	8.78703e+06	6.91879e+06	7.00273e+06	2.49878e+06	3.27381e+06	2.83897e+06	1.19271e+07	1.13061e+07	1.18108e+07	1.1674e+07	1.28945e+07	1.09027e+07	9.52182e+06	1.12881e+07	1.05442e+07	7.01461e+06	6.5883e+06	6.08521e+06	13.5	2.83	8.49	8.49	7.09	4.07	0.00216	4.12	0.000312	3.64	0.000408
P04843	Dolichyl-diphosphooligosaccharide--protein glycosyltransferase subunit 1 OS=Homo sapiens OX=9606 GN=RPN1 PE=1 SV=1	13	8.68148e+06	7.26515e+06	6.35275e+06	3.48829e+06	3.01451e+06	4.93495e+06	5.79617e+06	8.0752e+06	7.86185e+06	7.5541e+06	1.17602e+07	1.03293e+07	6.90274e+06	6.78711e+06	6.823e+06	4.31019e+06	3.27413e+06	2.96411e+06	7.63271e+06	6.61398e+06	1.07497e+07	1.19147e+07	1.54144e+07	1.50931e+07	5.61559e+06	8.88767e+06	6.99696e+06	5.5229e+06	6.09733e+06	6.10908e+06	20	25.9	13.7	22.9	5.67	2.37	0.0109	4.02	0.000833	2.04	0.016
P05388	60S acidic ribosomal protein P0 OS=Homo sapiens OX=9606 GN=RPLP0 PE=1 SV=1	7	1.75028e+07	2.26704e+07	2.38783e+07	2.52542e+07	2.12381e+07	2.8802e+07	2.30876e+07	1.88137e+07	2.25663e+07	2.51473e+07	4.06167e+07	3.15104e+07	4.14287e+07	3.82316e+07	3.91703e+07	8.82507e+06	1.02243e+07	9.71954e+06	5.46458e+07	4.64646e+07	6.16697e+07	4.69985e+07	3.6052e+07	4.33041e+07	1.81253e+07	3.07334e+07	2.11837e+07	3.29065e+07	3.4205e+07	3.45147e+07	7.39	14	13.2	28.2	2.52	5.66	0.000317	4.39	0.000394	2.43	0.0245
P06400	Retinoblastoma-associated protein OS=Homo sapiens OX=9606 GN=RB1 PE=1 SV=2	4	404649	332979	382270	97857.5	16017.5	77793.6	71099.8	79085.9	114553	445120	437609	540025	240682	213148	193163	204027	150194	154208	284385	245111	186381	191331	164277	224755	320553	374703	362986	193893	190699	177787	17.7	20.7	15.7	8.08	4.55	1.41	0.103	1.14	0.372	2.08	0.00729	Yes
P06493	Cyclin-dependent kinase 1 OS=Homo sapiens OX=9606 GN=CDK1 PE=1 SV=3	17	2.48058e+06	2.97294e+06	3.96979e+06	4.08929e+06	4.64079e+06	3.88087e+06	4.23534e+06	4.38463e+06	4.91844e+06	1.61252e+07	1.76872e+07	1.97787e+07	7.42494e+06	7.20954e+06	6.77095e+06	1.27135e+06	1.36122e+06	1.37569e+06	8.90954e+06	1.02775e+07	8.33574e+06	8.64455e+06	8.87182e+06	9.45246e+06	1.17688e+07	1.33942e+07	1.32946e+07	5.96542e+06	6.46659e+06	5.97366e+06	4.23	10.9	4.63	7.11	4.68	6.87	0.000232	6.73	8.31e-07	9.59	1.09e-05
P07305	Histone H1.0 OS=Homo sapiens OX=9606 GN=H1F0 PE=1 SV=3	7	2.66133e+06	3.16111e+06	5.24592e+06	3.6219e+06	4.00408e+06	4.29089e+06	4.48863e+06	3.93435e+06	4.80986e+06	4.7213e+06	6.10558e+06	3.6466e+06	4.09677e+06	3.2637e+06	4.42049e+06	1.37825e+06	1.42116e+06	2.1077e+06	7.8495e+06	8.71477e+06	9.24531e+06	9.13734e+06	7.53926e+06	9.30571e+06	3.41243e+06	4.61096e+06	2.5138e+06	3.26102e+06	2.93788e+06	3.91313e+06	25	8.19	11.3	30	14.7	5.26	0.00319	5.29	0.00181	2.15	0.0301
P07741	Adenine phosphoribosyltransferase OS=Homo sapiens OX=9606 GN=APRT PE=1 SV=2	3	463726	673792	636618	2.8506e+06	3.11058e+06	2.58841e+06	2.49646e+06	1.02248e+06	3.68642e+06	1.3638e+06	3.76633e+06	1.4087e+06	3.26259e+06	1.14553e+06	1.08443e+06	235139	305356	280061	6.16796e+06	6.76466e+06	5.54109e+06	5.08195e+06	1.95933e+06	7.07411e+06	982141	2.84286e+06	946882	2.59145e+06	1.02489e+06	955542	13	9.94	54.8	68.2	60.7	22.5	1.09e-05	17.2	0.0164	5.82	0.0407
P07947	Tyrosine-protein kinase Yes OS=Homo sapiens OX=9606 GN=YES1 PE=1 SV=3	4	2.67311e+06	2.61361e+06	3.112e+06	1.68621e+06	1.58857e+06	1.40364e+06	1.44705e+06	1.39753e+06	1.65128e+06	5.56037e+06	5.61812e+06	5.9068e+06	2.73714e+06	2.79302e+06	3.07835e+06	1.3478e+06	1.17144e+06	1.24688e+06	3.64852e+06	3.4547e+06	3.00482e+06	2.94571e+06	2.67804e+06	3.16876e+06	4.0043e+06	4.24059e+06	3.97035e+06	2.17409e+06	2.49885e+06	2.81845e+06	7.05	9.8	8.38	3.62	12.9	2.68	0.000297	2.33	0.00022	3.24	0.000135
P08134	Rho-related GTP-binding protein RhoC OS=Homo sapiens OX=9606 GN=RHOC PE=1 SV=1	5	304915	147829	1.25118e+06	368868	180676	394558	250880	404005	309523	1.03923e+06	3.26865e+06	1.39277e+06	474445	276188	394084	160772	140666	182932	430153	430021	423079	544021	793088	391705	748405	2.4672e+06	936173	480678	545882	350391	13.1	0.946	35.2	68.1	21.7	2.65	0.00573	3.57	0.0166	8.57	0.0274
P08579	U2 small nuclear ribonucleoprotein B'' OS=Homo sapiens OX=9606 GN=SNRPB2 PE=1 SV=1	4	674297	1.17733e+06	1.03368e+06	392196	358720	210672	385713	371738	458914	1.55326e+06	1.25481e+06	1.61128e+06	905083	750598	945176	553707	527689	414163	864996	784052	476930	793834	745275	892120	1.11858e+06	947138	1.08305e+06	718901	671544	832837	14.9	28.9	9.23	8.62	11.2	1.42	0.211	1.63	0.0153	2.11	0.00449	Yes
P09972	Fructose-bisphosphate aldolase C OS=Homo sapiens OX=9606 GN=ALDOC PE=1 SV=2	5	2.07108e+06	2.52119e+06	1.95205e+06	1.91058e+06	1.85197e+06	1.73152e+06	2.38908e+06	2.76368e+06	2.19602e+06	3.24646e+06	3.08221e+06	3.45464e+06	2.68641e+06	2.34033e+06	2.37633e+06	1.04426e+06	1.13504e+06	808704	4.13401e+06	4.15233e+06	3.95307e+06	4.86335e+06	5.29595e+06	4.2141e+06	2.33794e+06	2.38633e+06	2.32775e+06	2.1338e+06	2.09384e+06	2.09389e+06	16.9	2.7	11.4	1.33	1.09	4.1	0.00435	4.81	0.000483	2.36	0.0131
P0CG47	Polyubiquitin-B OS=Homo sapiens OX=9606 GN=UBB PE=1 SV=1	20	9.11511e+07	1.06389e+08	1.16151e+08	2.22421e+08	2.4648e+08	2.40558e+08	2.28064e+08	2.30739e+08	2.71625e+08	5.07419e+08	4.93884e+08	5.72844e+08	2.6275e+08	2.27044e+08	2.18863e+08	4.58634e+07	4.77602e+07	4.65698e+07	4.81389e+08	5.36027e+08	5.15007e+08	4.64282e+08	4.42177e+08	5.2125e+08	3.65418e+08	3.72787e+08	3.85046e+08	2.08711e+08	2.03135e+08	1.92633e+08	2.05	5.4	8.57	2.65	4.05	10.9	2.76e-05	10.2	0.000225	8.01	1.03e-07
P0DMM9	Sulfotransferase 1A3 OS=Homo sapiens OX=9606 GN=SULT1A3 PE=1 SV=1	1	21519.8	0	0	0	0	0	0	23344.1	0	68399.3	42454	49039.3	18948.4	0	0	10850.5	8584.19	11301.6	11095.9	2073.06	21038	30386	44733.4	14754.3	49257.8	32044.6	32962.5	15050.6	11817.9	1973.11	14.2	83.2	50.1	25.4	70.9	1.11	0.745	2.92	0.0857	3.72	0.0028	Yes
P0DMV9	Heat shock 70 kDa protein 1B OS=Homo sapiens OX=9606 GN=HSPA1B PE=1 SV=1	58	6.6882e+07	7.5999e+07	8.63239e+07	5.15368e+07	5.41668e+07	5.80214e+07	5.72835e+07	6.30968e+07	6.44645e+07	1.15478e+08	1.18661e+08	1.33623e+08	7.64879e+07	6.99224e+07	7.19257e+07	3.3799e+07	3.42747e+07	3.52486e+07	1.12094e+08	1.17361e+08	1.24251e+08	1.1667e+08	1.19353e+08	1.23746e+08	8.31618e+07	8.95833e+07	8.98834e+07	6.07602e+07	6.26218e+07	6.34205e+07	2.15	5.17	2.98	4.34	2.19	3.42	9.95e-05	3.48	1.49e-06	2.54	7.96e-05
P10412	Histone H1.4 OS=Homo sapiens OX=9606 GN=HIST1H1E PE=1 SV=2	29	1.62513e+08	1.89808e+08	1.91923e+08	2.8056e+08	3.23078e+08	2.71689e+08	3.22207e+08	2.61918e+08	3.11956e+08	2.26907e+08	2.9771e+08	2.25164e+08	2.36553e+08	2.38405e+08	2.62482e+08	8.19433e+07	8.51202e+07	7.69585e+07	6.07082e+08	7.02641e+08	5.81623e+08	6.55908e+08	5.02043e+08	5.98635e+08	1.63448e+08	2.24728e+08	1.51366e+08	1.87966e+08	2.13336e+08	2.31292e+08	5.06	10.1	13.3	21.9	10.3	7.75	7.08e-05	7.2	0.000475	2.21	0.0186
P11172	Uridine 5'-monophosphate synthase OS=Homo sapiens OX=9606 GN=UMPS PE=1 SV=1	5	631746	619135	744940	415653	231848	330658	403281	611855	434575	793910	905299	1.06862e+06	542531	566764	496750	339813	212843	308293	915185	690844	1.13841e+06	820944	1.17248e+06	919356	571735	683326	718288	443119	366974	445596	23	24.5	18.7	11.6	10.7	3.19	0.00467	3.38	0.00308	2.29	0.0141
P11498	Pyruvate carboxylase, mitochondrial OS=Homo sapiens OX=9606 GN=PC PE=1 SV=2	152	3.19637e+08	3.63169e+08	4.00931e+08	5.07907e+08	5.41313e+08	5.06424e+08	4.3247e+08	4.66126e+08	5.22155e+08	4.65293e+08	4.78135e+08	4.92088e+08	4.33894e+08	3.84734e+08	4.10766e+08	1.61396e+08	1.62863e+08	1.61267e+08	1.09956e+09	1.17805e+09	1.08435e+09	8.81572e+08	8.94182e+08	1.00181e+09	3.35733e+08	3.60504e+08	3.31848e+08	3.4516e+08	3.44349e+08	3.61921e+08	0.548	4.49	7.14	4.54	2.83	6.92	0.000143	5.72	0.000503	2.12	0.00103
P11766	Alcohol dehydrogenase class-3 OS=Homo sapiens OX=9606 GN=ADH5 PE=1 SV=4	2	146035	74074.8	111343	0	79770.3	72208.7	0	0	0	351475	338940	224832	176642	169555	65738.3	84665.6	78558.7	63826.8	132294	180492	171169	32933.3	27913.6	22869	253114	255834	151124	143980	151697	60017.9	14.2	15.8	18	27.1	42.9	2.13	0.00433	-2.71	0.00211	2.91	0.0135
P11940	Polyadenylate-binding protein 1 OS=Homo sapiens OX=9606 GN=PABPC1 PE=1 SV=2	43	3.56417e+07	3.81853e+07	4.15619e+07	2.29817e+07	2.49513e+07	2.23074e+07	2.61229e+07	2.66679e+07	2.95854e+07	5.6277e+07	5.6619e+07	6.11568e+07	3.80783e+07	3.32898e+07	3.508e+07	1.80188e+07	1.71231e+07	1.68917e+07	4.98478e+07	5.40846e+07	4.7811e+07	5.33356e+07	5.12327e+07	5.67905e+07	4.05318e+07	4.28407e+07	4.11275e+07	3.04129e+07	2.98751e+07	3.09263e+07	3.43	6.33	5.22	2.89	1.73	2.92	0.000103	3.1	2.25e-05	2.39	5.91e-06
P12081	Histidine--tRNA ligase, cytoplasmic OS=Homo sapiens OX=9606 GN=HARS PE=1 SV=2	3	197182	134559	245349	130943	142430	234052	333411	411713	308570	236149	237713	373077	292672	274257	283687	105487	103648	106402	288683	313968	512313	678711	788950	592136	263293	179427	250769	232467	296023	249969	1.33	33	14.4	19.6	12.7	3.53	0.0204	6.53	0.00182	2.2	0.023
P13645	Keratin, type I cytoskeletal 10 OS=Homo sapiens OX=9606 GN=KRT10 PE=1 SV=6	106	1.38492e+09	1.54945e+09	1.39345e+09	1.8435e+09	1.24812e+09	3.30827e+09	1.19384e+09	1.94098e+09	1.20779e+09	2.14719e+09	1.25085e+09	2.283e+09	1.66973e+09	1.51021e+09	1.619e+09	6.98563e+08	6.94619e+08	5.60694e+08	3.98912e+09	2.71445e+09	7.08111e+09	2.43308e+09	3.71889e+09	2.31879e+09	1.54631e+09	9.45752e+08	1.53456e+09	1.32635e+09	1.35155e+09	1.42701e+09	12.1	48.9	27.5	25.6	3.83	7.06	0.0163	4.34	0.00373	2.06	0.0336
P13987	CD59 glycoprotein OS=Homo sapiens OX=9606 GN=CD59 PE=1 SV=1	2	546394	504406	467529	497237	104505	287532	159728	558556	278662	510289	751278	710893	275554	297624	354369	275496	226079	187325	176397	240385	617838	334690	202548	537127	367485	567070	477838	289106	266278	312250	19.2	69.2	47.1	21.2	7.95	1.5	0.554	1.56	0.311	2.05	0.0136	Yes
P14174	Macrophage migration inhibitory factor OS=Homo sapiens OX=9606 GN=MIF PE=1 SV=4	3	729019	877145	890840	1.01197e+06	745642	946989	494634	623177	839188	1.00892e+06	2.04865e+06	2.09256e+06	1.15698e+06	961454	898506	368958	395722	359996	2.18965e+06	1.62157e+06	2.02725e+06	1.00691e+06	1.19417e+06	1.61037e+06	726576	1.54634e+06	1.40655e+06	918981	860192	791714	4.96	15	24.3	35.8	7.43	5.19	0.00142	3.39	0.0103	3.27	0.0395
P15121	Aldo-keto reductase family 1 member B1 OS=Homo sapiens OX=9606 GN=AKR1B1 PE=1 SV=3	21	2.57763e+07	3.14853e+07	27350799	2.34106e+07	2.56158e+07	2.35988e+07	2.92125e+07	3.45189e+07	3.06559e+07	3.39736e+07	3.63697e+07	4.05378e+07	2.89592e+07	2.69082e+07	2.68602e+07	1.31978e+07	1.41249e+07	1.10506e+07	5.07782e+07	5.57229e+07	5.08108e+07	5.98646e+07	6.59702e+07	5.88648e+07	2.44874e+07	2.75137e+07	2.73965e+07	2.31452e+07	2.41054e+07	2.37114e+07	12.3	5.43	6.25	6.48	2.04	4.1	0.000719	4.81	0.000376	2.07	0.00299
P15428	15-hydroxyprostaglandin dehydrogenase [NAD(+)] OS=Homo sapiens OX=9606 GN=HPGD PE=1 SV=1	3	173879	248601	294987	181660	235181	37113.4	0	245827	184196	464241	635524	603763	338055	299657	327805	91855.4	123453	136334	399063	515343	399885	410906	497109	359899	334323	479698	405829	268515	268097	326354	19.5	15.3	16.4	17.9	11.7	3.74	0.00128	3.61	0.00131	3.47	0.00149
P15559	NAD(P)H dehydrogenase [quinone] 1 OS=Homo sapiens OX=9606 GN=NQO1 PE=1 SV=1	8	1.70068e+06	1.72947e+06	1.53287e+06	1.18912e+06	1.97209e+06	1.42232e+06	3.01853e+06	2.89864e+06	1.7791e+06	4.58018e+06	4.33758e+06	4.60729e+06	1.80357e+06	2.04918e+06	2.2216e+06	870071	779999	689235	3.03436e+06	4.29712e+06	3.23732e+06	6.16659e+06	5.89319e+06	3.41638e+06	3.29841e+06	3.27404e+06	3.16541e+06	1.7167e+06	1.85559e+06	1.96137e+06	11.6	19.2	29.4	2.18	6.65	4.52	0.00072	6.62	0.00543	4.16	0.00163
P15880	40S ribosomal protein S2 OS=Homo sapiens OX=9606 GN=RPS2 PE=1 SV=2	6	754176	1.10435e+06	951851	1.29087e+06	1.44079e+06	1.11356e+06	1.78525e+06	1.58285e+06	2.12338e+06	2.08642e+06	2.57533e+06	2.63354e+06	1.04386e+06	1.31863e+06	1.21349e+06	380261	534855	523374	2.52996e+06	3.14665e+06	2.39873e+06	3.96337e+06	3.03315e+06	4.09264e+06	1.50253e+06	1.94388e+06	1.77017e+06	831178	1.19398e+06	1.08633e+06	18	14.8	15.6	12.8	18	5.61	0.000356	7.71	0.00017	3.63	0.00114
P15924	Desmoplakin OS=Homo sapiens OX=9606 GN=DSP PE=1 SV=3	169	7.34068e+07	1.06612e+08	9.80068e+07	6.44444e+07	4.47051e+07	1.07326e+08	4.34529e+07	7.16585e+07	4.67436e+07	1.80182e+08	1.29496e+08	1.70318e+08	9.58349e+07	9.31903e+07	9.11915e+07	3.79095e+07	4.7829e+07	4.05032e+07	1.40521e+08	1.05393e+08	2.30787e+08	9.83032e+07	1.37117e+08	9.62061e+07	1.29525e+08	9.91188e+07	1.14999e+08	7.70055e+07	8.36129e+07	8.02627e+07	12.2	40.7	20.8	13.3	4.11	3.78	0.0229	2.63	0.00415	2.72	0.000689
P16152	Carbonyl reductase [NADPH] 1 OS=Homo sapiens OX=9606 GN=CBR1 PE=1 SV=3	3	651387	937507	356148	8.67509e+06	1.34348e+07	9.45495e+06	606455	709034	564995	386165	4.10954e+07	3.75941e+07	3.33911e+07	323186	676979	328434	420199	372187	1.89497e+07	2.92171e+07	2.02405e+07	1.23454e+06	1.3587e+06	1.08421e+06	1.64463e+07	3.10191e+07	2.52695e+07	2.65223e+07	3.1923e+06	596517	12.3	24.5	11.2	30.3	141	61	0.000104	3.28	0.000261	64.9	0.00063
P16403	Histone H1.2 OS=Homo sapiens OX=9606 GN=HIST1H1C PE=1 SV=2	26	1.56186e+08	1.84007e+08	1.86338e+08	2.69779e+08	3.16648e+08	2.61948e+08	3.13269e+08	2.57104e+08	3.01206e+08	2.17646e+08	2.89753e+08	2.21767e+08	2.30677e+08	2.33145e+08	2.53673e+08	7.8761e+07	8.25292e+07	7.47075e+07	5.83768e+08	6.88635e+08	5.60784e+08	6.37718e+08	4.9284e+08	5.78027e+08	1.5675e+08	2.18713e+08	1.49082e+08	1.83394e+08	2.08617e+08	2.23546e+08	4.97	11.2	12.8	21.8	9.89	7.77	0.000139	7.24	0.000401	2.22	0.0182
P17931	Galectin-3 OS=Homo sapiens OX=9606 GN=LGALS3 PE=1 SV=5	7	2.37457e+06	3.38579e+06	3.81727e+06	3.19149e+06	3.42574e+06	3.29114e+06	3.5807e+06	4.05098e+06	4.0341e+06	6.16872e+06	7.25281e+06	7.11553e+06	4.0714e+06	4.01664e+06	4.31776e+06	1.21254e+06	1.36627e+06	1.53333e+06	6.90558e+06	7.45005e+06	7.16493e+06	7.28908e+06	7.76274e+06	7.74129e+06	4.44241e+06	5.47447e+06	4.78282e+06	3.23389e+06	3.60847e+06	3.84707e+06	11.7	3.8	3.52	10.7	8.67	5.23	0.000671	5.54	0.000687	3.57	0.000163
P17987	T-complex protein 1 subunit alpha OS=Homo sapiens OX=9606 GN=TCP1 PE=1 SV=1	25	4.85423e+06	5.43098e+06	5.84141e+06	8.59469e+06	1.00818e+07	9.00905e+06	9.26128e+06	8.78066e+06	9.91759e+06	9.48094e+06	9.23567e+06	9.93345e+06	8.96863e+06	7.2297e+06	8.25677e+06	2.52748e+06	2.58303e+06	2.36895e+06	1.86553e+07	2.29184e+07	1.93121e+07	1.9071e+07	1.74325e+07	1.92796e+07	6.87503e+06	6.98343e+06	6.68087e+06	7.15011e+06	6.49756e+06	7.29077e+06	4.46	11.3	5.44	2.24	6.06	8.14	0.00019	7.46	1.64e-06	2.75	6.15e-05
P18621	60S ribosomal protein L17 OS=Homo sapiens OX=9606 GN=RPL17 PE=1 SV=3	4	614360	849216	459372	268218	259750	369264	222202	452097	374754	877524	657415	903421	660493	540181	411482	309765	380626	245933	613757	568020	802000	582492	866337	719140	631949	632797	607249	617091	483288	365197	21.6	18.8	19.6	2.33	25.8	2.12	0.0108	2.32	0.00799	2	0.0291
P19525	Interferon-induced, double-stranded RNA-activated protein kinase OS=Homo sapiens OX=9606 GN=EIF2AK2 PE=1 SV=2	9	1.12488e+06	1.21444e+06	1.08151e+06	612236	761476	645871	689356	1.17242e+06	841220	1.42492e+06	1.54362e+06	1.79148e+06	1.31021e+06	1.18938e+06	1.08645e+06	595494	559531	512078	1.37543e+06	1.76504e+06	1.40402e+06	1.60382e+06	2.2495e+06	1.78364e+06	1.02616e+06	1.19467e+06	1.20417e+06	1.0673e+06	1.06685e+06	998107	7.53	14.3	17.7	8.77	3.81	2.73	0.0014	3.38	0.00234	2.05	0.000526
P20618	Proteasome subunit beta type-1 OS=Homo sapiens OX=9606 GN=PSMB1 PE=1 SV=2	3	37991	51281.8	0	173589	271659	425035	342636	290825	323277	524591	224011	644433	279093	378032	359591	30411.3	47456.6	21538.6	741511	590785	909885	697491	557297	620358	418925	169085	433166	221682	338217	316852	39.8	21.4	11.2	43.6	21.2	22.6	0.00105	18.9	0.00349	10.3	0.00504
P22087	rRNA 2'-O-methyltransferase fibrillarin OS=Homo sapiens OX=9606 GN=FBL PE=1 SV=2	10	2.47954e+06	2.78417e+06	2.69375e+06	4.10761e+06	3680633	3.50496e+06	4.89789e+06	3.60643e+06	4.64768e+06	7.19823e+06	8.11667e+06	8.7118e+06	3.91121e+06	3.73639e+06	4.08981e+06	1.27059e+06	1.25276e+06	1.41094e+06	8.89888e+06	9.37517e+06	9.28771e+06	1.00105e+07	8.39924e+06	8.9353e+06	5.18381e+06	6.22279e+06	6.16346e+06	3.10664e+06	3.34885e+06	3.60852e+06	6.61	2.76	9	9.96	7.48	7.01	4.83e-05	6.95	1.55e-05	4.47	0.000102
P22629	Streptavidin OS=Streptomyces avidinii PE=1 SV=1	22	5.91815e+09	6.39477e+09	6.98712e+09	1.05931e+10	1.47111e+10	1.12847e+10	1.28949e+10	8.1903e+09	1.27397e+10	8.81075e+09	9.41355e+09	8.68542e+09	9.20827e+09	8.18159e+09	7.30473e+09	2.98398e+09	2.86613e+09	2.79952e+09	2.29208e+10	3.19935e+10	2.41576e+10	2.62497e+10	1.56948e+10	2.4447e+10	6.34508e+09	7.10541e+09	5.83804e+09	7.31407e+09	7.3199e+09	6.43654e+09	3.24	18.7	25.5	9.92	7.24	9.14	0.00167	7.68	0.0058	2.23	0.00251
P23396	40S ribosomal protein S3 OS=Homo sapiens OX=9606 GN=RPS3 PE=1 SV=2	16	7.19945e+06	7.67763e+06	9.82602e+06	5.22328e+06	5.06176e+06	5.10698e+06	5.65673e+06	6.95835e+06	5.95574e+06	1.5e+07	1.61697e+07	1.7891e+07	8.5523e+06	8.32899e+06	7.79376e+06	3.64245e+06	3.49572e+06	3.96508e+06	1.13059e+07	1.17878e+07	1.14104e+07	1.16891e+07	1.30856e+07	1.14564e+07	1.08022e+07	1.2205e+07	1.20257e+07	6.9002e+06	7.45177e+06	6.86744e+06	6.49	2.2	7.3	6.54	4.64	3.11	0.000353	3.26	3.17e-05	3.16	2.8e-05
P23919	Thymidylate kinase OS=Homo sapiens OX=9606 GN=DTYMK PE=1 SV=4	2	255029	0	78398.3	135327	68173.7	0	125714	70210.6	59992.4	181861	282529	292705	231501	172009	247632	40610.4	12441.6	48487.1	303130	152634	170417	255911	143963	117298	201693	213255	196746	183880	153893	218199	56	39.4	42.7	4.16	17.4	6.17	0.0285	5.09	0.0363	6.02	0.0444
P24390	ER lumen protein-retaining receptor 1 OS=Homo sapiens OX=9606 GN=KDELR1 PE=1 SV=1	2	145361	152018	288637	388588	351957	290236	343639	384286	360711	417876	193574	303777	262149	226619	225107	87190.8	72522.8	115648	840805	765412	621318	699533	736392	692192	300934	146111	204188	208223	202751	198352	23.9	15	3.34	36	2.43	8.09	0.000473	7.73	0.00372	2.37	0.0358
P25787	Proteasome subunit alpha type-2 OS=Homo sapiens OX=9606 GN=PSMA2 PE=1 SV=2	5	368606	172827	220711	127340	251575	458761	327630	334702	336783	805595	620835	750017	488442	235701	219968	185854	117680	111502	543683	556497	744935	705374	649417	688266	580149	468611	504136	387966	336372	290829	29.8	18.3	4.21	11	14.4	4.45	0.0028	4.92	0.00867	3.74	0.00747
P25788	Proteasome subunit alpha type-3 OS=Homo sapiens OX=9606 GN=PSMA3 PE=1 SV=2	2	1.03202e+06	987821	744661	1.00664e+06	923404	1.32328e+06	144246	1.39741e+06	908154	1.94394e+06	1.01175e+06	1.46965e+06	162206	766111	185943	520354	442750	298363	2.17812e+06	2.00815e+06	2.83279e+06	293636	2.67781e+06	1.74272e+06	1.39993e+06	763678	987846	128839	685423	163843	26.8	18.6	76.4	30.7	95.6	5.56	0.00189	3.74	0.276	2.5	0.0196
P25789	Proteasome subunit alpha type-4 OS=Homo sapiens OX=9606 GN=PSMA4 PE=1 SV=1	3	636029	682657	481562	590902	325493	529299	484847	801287	652302	1.03087e+06	790844	1.08261e+06	584901	704045	739365	365093	305973	192947	1.27856e+06	802964	1.13309e+06	986984	1.53548e+06	1.25175e+06	742378	596935	727692	464583	629894	651488	30.4	22.7	21.8	11.6	17.6	3.72	0.00628	4.37	0.0045	2.39	0.03
P26006	Integrin alpha-3 OS=Homo sapiens OX=9606 GN=ITGA3 PE=1 SV=5	7	750320	821822	842677	832771	916389	1.00024e+06	847905	1.1604e+06	967630	1.07216e+06	1.11401e+06	1.02334e+06	1.01556e+06	957771	890638	378317	372528	361350	1.8019e+06	1.9929e+06	2.14124e+06	1.99345e+06	2.22364e+06	1.85685e+06	772113	840860	768126	806653	856897	784781	2.33	8.6	9.16	5.15	4.53	5.34	0.00043	5.46	0.000493	2.14	0.000259
P26373	60S ribosomal protein L13 OS=Homo sapiens OX=9606 GN=RPL13 PE=1 SV=4	4	636651	825788	819513	588072	693186	606227	718142	695531	798285	1.09544e+06	1.3094e+06	1.0594e+06	968531	700389	912594	324240	394478	334175	1.27244e+06	1.51033e+06	1.31134e+06	1.47188e+06	1.33282e+06	1.53418e+06	788879	988346	712093	769297	626623	804128	10.8	9.35	7.13	17.2	12.8	3.89	8.36e-05	4.12	0.000105	2.36	0.00329
P26599	Polypyrimidine tract-binding protein 1 OS=Homo sapiens OX=9606 GN=PTBP1 PE=1 SV=1	18	6.77083e+06	9.00681e+06	8.233e+06	3.66678e+06	3.8408e+06	3.87997e+06	4.73591e+06	4.86753e+06	4.88405e+06	9.96139e+06	1.10985e+07	1.07628e+07	6.47829e+06	5.53599e+06	5.8426e+06	3.49972e+06	4.05023e+06	3.55197e+06	7.70763e+06	7.90748e+06	8.44203e+06	9.66548e+06	1.04264e+07	9.51884e+06	7.1934e+06	8.10809e+06	7.25036e+06	5.16198e+06	4.99311e+06	5.27132e+06	8.21	4.73	4.94	6.82	2.73	2.17	0.000492	2.67	0.000206	2.03	0.00036
P27448	MAP/microtubule affinity-regulating kinase 3 OS=Homo sapiens OX=9606 GN=MARK3 PE=1 SV=5	3	45520.8	117642	154328	129646	0	0	0	166810	0	256006	300252	235030	100353	97480.6	150938	37549.8	58451.4	63447.1	71959	11278.7	37331.9	15240.5	75022.4	12638.3	215187	226633	215643	96116.9	91736.8	140726	25.8	75.7	103	2.96	24.8	-1.32	0.451	-1.55	0.312	4.12	0.0119	Yes
P27635	60S ribosomal protein L10 OS=Homo sapiens OX=9606 GN=RPL10 PE=1 SV=4	4	941520	776163	1.13669e+06	825138	583988	663472	832268	775676	1.16879e+06	3.15965e+06	2.30439e+06	2.789e+06	1.4733e+06	1.26427e+06	1.23077e+06	407588	353601	459647	1.78539e+06	1.27717e+06	1.4307e+06	1.69422e+06	1.4864e+06	2.24286e+06	2.27542e+06	1.73937e+06	1.87467e+06	1.17023e+06	1.13112e+06	1.08449e+06	13	17.4	21.6	14.2	3.8	3.68	0.00065	4.44	0.00116	4.82	0.000143
P29558	RNA-binding motif, single-stranded-interacting protein 1 OS=Homo sapiens OX=9606 GN=RBMS1 PE=1 SV=3	5	1.00847e+06	886107	1.35654e+06	327550	265623	497403	452852	408261	352806	1.35111e+06	1.45335e+06	1.66478e+06	965058	841871	778324	508481	397160	543524	736945	588793	678499	921852	977308	1.09065e+06	973001	1.097e+06	1.11901e+06	766539	753204	885681	15.8	11.2	8.63	7.41	9.1	1.38	0.054	2.06	0.00652	2.2	0.00601
P30048	Thioredoxin-dependent peroxide reductase, mitochondrial OS=Homo sapiens OX=9606 GN=PRDX3 PE=1 SV=3	7	1.50452e+06	1.71213e+06	1.62687e+06	2.20309e+06	2.48957e+06	2.75289e+06	2.75032e+06	2.32131e+06	3.09081e+06	3.15296e+06	2.46456e+06	4.70502e+06	1.84615e+06	1.82765e+06	1.59836e+06	772271	798097	715929	4.76952e+06	5.63529e+06	5.89584e+06	5.78392e+06	4.44824e+06	5.93116e+06	2.2706e+06	3.20791e+06	3.16255e+06	1.48568e+06	1.74225e+06	1.4115e+06	5.51	10.9	15.2	18.4	11.2	7.13	0.000126	7.07	0.000833	3.78	0.00448
P30050	60S ribosomal protein L12 OS=Homo sapiens OX=9606 GN=RPL12 PE=1 SV=1	4	3.14542e+06	3.66427e+06	3.76735e+06	2.86691e+06	2.50629e+06	3.07673e+06	3.06976e+06	3.10405e+06	3.58162e+06	5.47347e+06	5.90928e+06	5.90156e+06	3.67711e+06	2.94437e+06	3.67324e+06	1.58594e+06	1.64236e+06	1.50946e+06	6.20327e+06	5.45049e+06	6.58644e+06	6.24899e+06	5.94818e+06	6.87301e+06	3.94172e+06	4.46036e+06	3.96682e+06	2.9207e+06	2.63427e+06	3.23666e+06	4.22	9.5	7.42	7.09	10.3	3.85	0.000362	4.03	5.91e-05	2.61	0.000137
P30405	Peptidyl-prolyl cis-trans isomerase F, mitochondrial OS=Homo sapiens OX=9606 GN=PPIF PE=1 SV=1	10	261566	214739	200417	594529	628925	809221	865097	678735	1.00373e+06	3.28568e+06	3.65143e+06	3.73832e+06	1.03302e+06	716980	1.10399e+06	158064	129704	175646	1.32221e+06	1.42068e+06	1.51338e+06	1.57886e+06	1.37502e+06	1.82089e+06	2.36618e+06	2.75613e+06	2.51277e+06	847630	682000	767900	15	6.74	14	7.74	10.8	9.18	0.000325	10.3	4.43e-05	16.5	0.000113
P30740	Leukocyte elastase inhibitor OS=Homo sapiens OX=9606 GN=SERPINB1 PE=1 SV=1	6	557127	480753	630646	874307	379604	3.90977e+06	678994	731073	662037	1.01961e+06	685188	772394	1.12877e+06	849537	833509	288129	343465	256468	1.89178e+06	948639	8.55512e+06	1.3822e+06	1.40093e+06	1.45003e+06	807672	517185	519177	896576	778945	741420	14.9	109	2.48	27.2	10	12.8	0.079	4.77	0.00233	2.08	0.0219
P30838	Aldehyde dehydrogenase, dimeric NADP-preferring OS=Homo sapiens OX=9606 GN=ALDH3A1 PE=1 SV=3	15	8.12057e+06	8.28589e+06	8.63964e+06	6.76062e+06	6.5834e+06	5.19555e+06	9.42501e+06	7.92878e+06	7.09517e+06	1.47871e+07	1.38642e+07	1.40901e+07	9.17034e+06	8.98612e+06	9.72876e+06	4.10307e+06	3.42446e+06	3.59151e+06	1.46283e+07	1.43956e+07	1.11223e+07	1.91861e+07	1.52046e+07	1.36243e+07	1.06489e+07	1.04648e+07	9.4709e+06	7.28393e+06	8.03969e+06	8.57245e+06	9.54	14.6	17.9	6.22	8.13	3.61	0.000712	4.32	0.000949	2.75	0.000233
P31025	Lipocalin-1 OS=Homo sapiens OX=9606 GN=LCN1 PE=1 SV=1	2	74071.9	108878	173361	133651	47279.5	298621	67780	154780	228547	245686	304478	724000	202504	112444	160662	53875.7	50256.6	73198.2	289187	429345	639267	393156	296599	438575	176931	229822	486648	160847	103580	149916	20.9	38.9	19.3	55.6	22	7.66	0.00464	6.36	0.000352	5.04	0.0252
P31151	Protein S100-A7 OS=Homo sapiens OX=9606 GN=S100A7 PE=1 SV=4	7	1.49051e+06	992833	649361	1.19658e+06	789933	1.78724e+06	2.5841e+06	3.30508e+06	4.36771e+06	2.42379e+06	1.23395e+06	2.08111e+06	1.99655e+06	1.66363e+06	1.55866e+06	491669	452374	467900	2.5891e+06	1.71789e+06	3.826e+06	5.26036e+06	6.3334e+06	8.38148e+06	1.74549e+06	931395	1.39885e+06	1.58585e+06	1.48841e+06	1.37341e+06	4.21	39.1	23.8	30.1	7.17	5.76	0.0172	14.1	0.00203	2.89	0.0288
P31689	DnaJ homolog subfamily A member 1 OS=Homo sapiens OX=9606 GN=DNAJA1 PE=1 SV=2	10	2.02242e+06	2.36778e+06	2.15348e+06	1.20605e+06	1.20002e+06	1.00144e+06	1.16219e+06	1.46678e+06	1.36376e+06	3.35494e+06	2.79801e+06	3.22044e+06	2.07751e+06	1.74849e+06	1.87727e+06	1.04969e+06	1.06126e+06	883069	2.65456e+06	2.42972e+06	2.34625e+06	2.40491e+06	2.84547e+06	2.47847e+06	2.41606e+06	2.1857e+06	2.16467e+06	1.65015e+06	1.56887e+06	1.6562e+06	9.99	6.44	9.16	6.18	3	2.48	0.000568	2.58	0.000305	2.26	0.000891
P31930	Cytochrome b-c1 complex subunit 1, mitochondrial OS=Homo sapiens OX=9606 GN=UQCRC1 PE=1 SV=3	4	73807.1	100802	0	281693	307544	355272	385893	418598	286154	129470	344667	342429	440330	266212	309302	49491.4	54035.1	55194.7	609512	800185	760541	838473	805434	552419	113006	275021	306185	349751	238174	323297	5.7	13.9	21.4	44.8	19.2	13.7	0.000231	13.8	0.00155	4.37	0.0466
P31939	Bifunctional purine biosynthesis protein PURH OS=Homo sapiens OX=9606 GN=ATIC PE=1 SV=3	20	4.45972e+06	3.50106e+06	3.52125e+06	3.67726e+06	3.32209e+06	4.79467e+06	3.95546e+06	4.95376e+06	4.40588e+06	5.25113e+06	4.59415e+06	6.9022e+06	4.86167e+06	4.55805e+06	4.82868e+06	1.91434e+06	1.57176e+06	1.61582e+06	8.002e+06	7.45435e+06	1.08592e+07	8.10137e+06	9.50303e+06	8.4977e+06	4.38506e+06	3.55379e+06	4.7843e+06	3.99817e+06	4.08545e+06	4.3112e+06	11	20.8	8.3	14.8	3.91	5.16	0.00102	5.12	4.98e-05	2.49	0.00173
P33981	Dual specificity protein kinase TTK OS=Homo sapiens OX=9606 GN=TTK PE=1 SV=2	1	165161	0	0	0	87351.7	67966.1	0	0	0	0	123194	219116	0	0	0	720.431	1829.14	11689.5	91282.8	189966	145497	3988.54	7982.82	4092.8	104794	92987.9	147282	10023.6	7476.93	8512.04	127	34.7	42.5	24.8	14.8	30	0.0325	1.13	0.48	24.2	0.0399
P35080	Profilin-2 OS=Homo sapiens OX=9606 GN=PFN2 PE=1 SV=3	3	196182	201280	426315	127836	121515	162464	108018	165769	314540	550981	614960	745321	300417	439210	326951	107517	138124	170811	279031	278202	361999	465395	319902	603592	396789	464176	500979	278489	392952	288091	22.8	15.7	30.6	11.6	19.9	2.21	0.0109	3.34	0.00823	3.27	0.0042
P35613	Basigin OS=Homo sapiens OX=9606 GN=BSG PE=1 SV=2	1	2.18185e+06	2.10291e+06	2.02011e+06	804541	919039	737397	858172	1.05035e+06	936423	2.765e+06	2.81058e+06	2.95881e+06	1.8016e+06	1.71015e+06	1.53096e+06	1.10011e+06	942542	809395	1.74082e+06	1.99866e+06	1.57857e+06	1.74695e+06	2.01274e+06	1.79696e+06	1.99122e+06	2.12145e+06	1.98881e+06	1.431e+06	1.53003e+06	1.349e+06	15.3	12	7.63	3.73	6.31	1.86	0.00601	1.95	0.00714	2.14	0.00983	Yes
P35754	Glutaredoxin-1 OS=Homo sapiens OX=9606 GN=GLRX PE=1 SV=2	2	0	0	0	229372	171729	62518.1	46153.7	0	98163.9	45062.3	195374	346734	101892	55312.8	63467.4	6268.92	8000.12	41740	496302	373463	498221	95920.5	154752	212216	124884	147470	233063	135518	53721	62951.6	107	15.7	37.7	33.9	53.3	24.4	0.0244	8.26	0.0408	9.02	0.0406
P36404	ADP-ribosylation factor-like protein 2 OS=Homo sapiens OX=9606 GN=ARL2 PE=1 SV=4	2	92954.9	0	60010.5	0	0	0	0	0	112213	159772	0	252243	208579	156868	144518	46868.6	46662	28943.9	23996.2	6133.77	27917.6	14291.5	43235.8	42385.1	121161	147005	169549	165673	140346	157441	25.2	60	49.5	16.6	8.36	-2.11	0.191	-1.23	0.519	3.57	0.00458	Yes
P38159	RNA-binding motif protein, X chromosome OS=Homo sapiens OX=9606 GN=RBMX PE=1 SV=3	21	6.24421e+06	5.67047e+06	7.06829e+06	5.91942e+06	6.34196e+06	6.73604e+06	6.692e+06	6.69224e+06	9.59315e+06	1.09576e+07	1.14548e+07	1.26941e+07	7.87354e+06	6.76723e+06	7.48009e+06	3.15365e+06	2.59974e+06	3.11433e+06	1.28639e+07	1.37921e+07	1.442e+07	1.37414e+07	1.28241e+07	1.84089e+07	7.89115e+06	8.6462e+06	8.53253e+06	6.25389e+06	6.0545e+06	6.59104e+06	10.5	5.72	20	4.87	4.3	4.63	0.000192	5.07	0.000821	2.83	0.000895
P38398	Breast cancer type 1 susceptibility protein OS=Homo sapiens OX=9606 GN=BRCA1 PE=1 SV=2	2	145633	102713	45696.3	35551.5	126067	72942.8	49523.7	106453	76969.5	292333	162577	170974	161590	116138	111647	73429.5	46037	78430	298058	279614	160252	104089	206078	152194	210523	122715	114923	128350	103906	98377.1	26.4	30.4	33.1	35.5	14.5	3.73	0.00773	2.34	0.0332	2.26	0.035
P39023	60S ribosomal protein L3 OS=Homo sapiens OX=9606 GN=RPL3 PE=1 SV=2	9	2.85824e+06	3.53425e+06	4.02186e+06	2.21794e+06	2.3532e+06	1.66911e+06	2.2784e+06	1.93902e+06	1.90307e+06	3.95763e+06	4.48276e+06	4.52536e+06	3.18908e+06	2.7799e+06	2.60161e+06	1.44206e+06	1.35668e+06	1.76645e+06	4.92275e+06	5.11757e+06	3.9147e+06	4.36021e+06	3.75542e+06	3.69297e+06	2.85009e+06	3.41456e+06	3.04179e+06	2.53647e+06	2.48712e+06	2.29735e+06	14.2	13.9	9.36	9.25	5.17	3.06	0.000648	2.59	0.00113	2.04	0.00294
P39656	Dolichyl-diphosphooligosaccharide--protein glycosyltransferase 48 kDa subunit OS=Homo sapiens OX=9606 GN=DDOST PE=1 SV=4	6	353817	398544	521492	682485	747982	460205	852111	942569	964425	687558	621763	619607	528114	532211	379330	204030	209876	231701	1.48097e+06	1.62666e+06	1.49798e+06	2.04058e+06	1.80621e+06	1.8507e+06	518419	471522	504766	421744	489444	427233	6.78	5.19	6.55	4.84	8.43	7.13	4.35e-06	8.83	2.22e-06	2.32	0.000113
P39748	Flap endonuclease 1 OS=Homo sapiens OX=9606 GN=FEN1 PE=1 SV=1	10	1.50958e+06	1.38905e+06	1.56361e+06	1.05793e+06	1.47646e+06	977423	1.0963e+06	1.39454e+06	1.57407e+06	4.2959e+06	4.68092e+06	4.57319e+06	2.04148e+06	2.20159e+06	2.28135e+06	787050	580438	642162	2.5818e+06	3.25991e+06	2.56791e+06	2.4236e+06	2.68804e+06	3.02551e+06	3.09369e+06	3.53319e+06	3.07394e+06	1.62474e+06	1.96971e+06	2.01432e+06	15.8	14.1	11.1	8.03	11.4	4.18	0.000301	4.05	0.000387	4.83	0.000596
P40227	T-complex protein 1 subunit zeta OS=Homo sapiens OX=9606 GN=CCT6A PE=1 SV=3	37	2.17182e+07	2.47636e+07	2.62274e+07	3.43469e+07	3.60705e+07	3.42847e+07	3.1096e+07	3.3515e+07	3.66219e+07	3.43653e+07	3.65462e+07	4.02525e+07	2.98058e+07	2.56762e+07	2.79309e+07	1.1037e+07	1.11608e+07	1.05805e+07	7.44109e+07	7.84436e+07	7.39985e+07	6.35382e+07	6.43187e+07	7.02762e+07	2.47502e+07	2.75457e+07	2.70592e+07	2.37573e+07	2.30795e+07	2.46475e+07	2.8	3.25	5.58	5.65	3.3	6.92	2e-07	6.04	1.82e-05	2.42	0.000195
P42330	Aldo-keto reductase family 1 member C3 OS=Homo sapiens OX=9606 GN=AKR1C3 PE=1 SV=4	23	5.54405e+07	6.01464e+07	5.92852e+07	6.23433e+07	6.33029e+07	5.71784e+07	5.98141e+07	6.33111e+07	5.83709e+07	1.56387e+08	1.53768e+08	1.81718e+08	9.01495e+07	7.92163e+07	7.97104e+07	2.79703e+07	2.68224e+07	2.37718e+07	1.35408e+08	1.37685e+08	1.21572e+08	1.23545e+08	1.2092e+08	1.11765e+08	1.12632e+08	1.16071e+08	1.22148e+08	7.2069e+07	7.11274e+07	7.0686e+07	8.29	6.63	5.21	4.12	0.991	5.02	1.98e-05	4.53	5.26e-05	4.47	0.000135
P42357	Histidine ammonia-lyase OS=Homo sapiens OX=9606 GN=HAL PE=1 SV=1	2	190790	143972	132388	146002	91174.5	221132	149299	170397	163268	371382	199780	288908	183877	133247	133165	102358	68392.5	56400.4	318515	200396	475565	312856	333143	320697	267451	186157	194194	159433	134607	133232	31.5	41.6	3.17	20.7	10.4	4.38	0.0117	4.26	0.0131	2.85	0.0105
P42694	Probable helicase with zinc finger domain OS=Homo sapiens OX=9606 GN=HELZ PE=1 SV=2	3	16496.5	0	29816.8	0	0	0	61761.2	0	349013	366665	543395	400167	306273	107036	108242	33111.3	17236.1	36116.8	16135.1	21049.9	32490.5	152639	142360	173882	270838	412835	268978	92834.2	111609	104702	35.2	36.1	10.3	26	9.21	-1.24	0.539	5.42	0.0134	11	0.00205
P43243	Matrin-3 OS=Homo sapiens OX=9606 GN=MATR3 PE=1 SV=2	38	2.47873e+07	2.63702e+07	2.60367e+07	1.10048e+07	1.11004e+07	1.07553e+07	9.87235e+06	1.02901e+07	1.2125e+07	4.05634e+07	3.87516e+07	4.57999e+07	2.41004e+07	1.92596e+07	2.24512e+07	1.25078e+07	1.18292e+07	1.05443e+07	2.37379e+07	2.4222e+07	2.33632e+07	2.04735e+07	1.9869e+07	2.33949e+07	2.92117e+07	2.96436e+07	3.07851e+07	1.92076e+07	1.72569e+07	1.99698e+07	8.58	1.81	8.88	2.72	7.44	2.04	0.00362	1.83	0.00106	2.57	0.00134
P43304	Glycerol-3-phosphate dehydrogenase, mitochondrial OS=Homo sapiens OX=9606 GN=GPD2 PE=1 SV=3	4	204890	238635	186933	263983	194738	268534	317665	348216	427109	293793	401716	420217	301888	171421	205702	108651	112502	159174	571192	557041	574858	646659	667274	819608	291079	303219	282455	239787	163199	181253	22.2	1.66	13.3	3.57	20.6	4.48	0.00616	5.61	0.000741	2.31	0.0177
P43353	Aldehyde dehydrogenase family 3 member B1 OS=Homo sapiens OX=9606 GN=ALDH3B1 PE=1 SV=1	3	1.19112e+06	1.17412e+06	1.20977e+06	647646	984418	578463	1.25718e+06	1.0377e+06	798494	1.61822e+06	1.49812e+06	1.53798e+06	996435	1.17172e+06	1.12693e+06	601338	527073	487911	1.48589e+06	2.14084e+06	1.23833e+06	2.5592e+06	1.98851e+06	1.53228e+06	1.16536e+06	1.13079e+06	1.03377e+06	796505	1.058e+06	992985	10.7	28.8	25.4	6.15	14.3	3.01	0.0128	3.76	0.00591	2.06	0.00141
P43686	26S proteasome regulatory subunit 6B OS=Homo sapiens OX=9606 GN=PSMC4 PE=1 SV=2	1	171130	0	0	112158	77206.5	102200	171800	175888	160530	195405	159493	130028	0	140938	0	10590.4	4100.21	24140.3	242682	167903	218783	349727	337048	308052	140721	120387	87400.4	19904	2858.28	3531.8	79	18.2	6.44	23.2	110	16.2	0.0235	25.6	0.0205	8.98	0.0345
P46778	60S ribosomal protein L21 OS=Homo sapiens OX=9606 GN=RPL21 PE=1 SV=2	1	265659	272181	271867	216752	312172	170159	237445	142335	243969	560383	424889	540139	213009	387486	152084	133947	121994	108929	468995	678890	364265	483358	272751	468168	403560	320709	363063	169191	346676	134008	10.3	31.8	28.8	11.4	52.6	4.14	0.0104	3.36	0.0164	2.98	0.000275
P46779	60S ribosomal protein L28 OS=Homo sapiens OX=9606 GN=RPL28 PE=1 SV=3	4	306057	266837	370548	479854	509479	349242	495514	485739	503452	674358	479732	596728	493034	357892	389466	154316	134162	160031	1.03828e+06	1.10798e+06	1.3104e+06	1.0087e+06	930805	966106	485639	362105	401100	391613	320199	343176	9.09	12.3	4.03	15.2	10.4	7.71	3.31e-05	6.48	0.000138	2.78	0.00128
P46781	40S ribosomal protein S9 OS=Homo sapiens OX=9606 GN=RPS9 PE=1 SV=3	7	1.36781e+06	1.25523e+06	2.28564e+06	960472	1.02913e+06	644029	1.14486e+06	1.04469e+06	983127	1.84921e+06	2.39914e+06	2.14253e+06	1.62771e+06	1.35936e+06	1.49817e+06	704931	745949	915786	2.08373e+06	2.24629e+06	1.39855e+06	2.35602e+06	2.00593e+06	1.89601e+06	1.37583e+06	1.81089e+06	1.69227e+06	1.30176e+06	1.22612e+06	1.3372e+06	14.2	23.6	11.5	13.8	4.4	2.42	0.0129	2.64	0.000827	2.06	0.00325
P46782	40S ribosomal protein S5 OS=Homo sapiens OX=9606 GN=RPS5 PE=1 SV=4	16	5.92521e+06	6.39638e+06	8.18471e+06	1.04774e+07	1.06857e+07	9.11299e+06	8.74757e+06	8.89743e+06	1.10969e+07	2.53656e+07	2.9183e+07	2.63797e+07	1.4171e+07	1.31631e+07	1.29238e+07	2.98963e+06	2.88431e+06	3.55328e+06	2.26747e+07	2.32434e+07	2.21085e+07	1.78235e+07	1.70964e+07	1.95588e+07	1.8267e+07	2.20276e+07	1.77315e+07	1.12598e+07	1.17834e+07	1.13995e+07	11.4	2.5	6.97	12.1	2.36	7.22	0.000642	5.78	8.41e-05	6.16	4.24e-05
P48643	T-complex protein 1 subunit epsilon OS=Homo sapiens OX=9606 GN=CCT5 PE=1 SV=1	89	1.48379e+08	1.64822e+08	1.80779e+08	2.32852e+08	2.42725e+08	2.43305e+08	2.22502e+08	2.28994e+08	2.38465e+08	2.90098e+08	2.85148e+08	3.25649e+08	2.15338e+08	1.86321e+08	1.91319e+08	7.4833e+07	7.39805e+07	7.30143e+07	5.03894e+08	5.30921e+08	5.22568e+08	4.54536e+08	4.37835e+08	4.57224e+08	2.08914e+08	2.15273e+08	2.18994e+08	1.71207e+08	1.66914e+08	1.68942e+08	1.23	2.67	2.34	2.38	1.27	7.02	3.07e-06	6.08	1.24e-06	2.9	6.91e-06
P48729	Casein kinase I isoform alpha OS=Homo sapiens OX=9606 GN=CSNK1A1 PE=1 SV=2	18	4.32981e+06	5.1419e+06	7.04824e+06	1.62708e+06	1.62221e+06	1.67652e+06	1.32405e+06	1.92483e+06	1.58998e+06	9.73442e+06	8.55341e+06	9.78646e+06	4.42402e+06	3.37275e+06	3.64817e+06	2.20546e+06	2.30888e+06	2.90534e+06	3.60167e+06	3.60372e+06	3.39723e+06	2.84705e+06	3.50806e+06	3.13048e+06	7.01024e+06	6.4716e+06	6.59799e+06	3.60878e+06	3.25519e+06	3.2716e+06	15.3	3.36	10.5	4.21	5.91	1.43	0.0447	1.28	0.0825	2.71	0.00445	Yes
P49368	T-complex protein 1 subunit gamma OS=Homo sapiens OX=9606 GN=CCT3 PE=1 SV=4	23	7.08634e+06	8.55972e+06	8.7653e+06	6.08656e+06	4.89206e+06	5.15547e+06	6.66126e+06	6.97072e+06	7.88368e+06	9.52368e+06	1.06409e+07	1.16344e+07	8.11528e+06	7.34436e+06	7.04149e+06	3.65764e+06	3.83632e+06	3.53701e+06	1.32103e+07	1.06946e+07	1.16291e+07	1.53584e+07	1.3587e+07	1.62853e+07	6.86178e+06	8.41392e+06	7.82027e+06	6.44591e+06	7.00344e+06	6.20457e+06	4.1	10.7	9.09	10.2	6.25	3.22	0.00092	4.1	0.000276	2.09	0.00264
P49773	Histidine triad nucleotide-binding protein 1 OS=Homo sapiens OX=9606 GN=HINT1 PE=1 SV=2	3	709713	1.12084e+06	931449	455942	410499	615043	385495	644626	457666	1.04803e+06	1.75873e+06	1.49532e+06	1.33241e+06	815181	655383	357843	502367	428854	996646	900697	1.3192e+06	788749	1.2432e+06	915952	754738	1.3275e+06	1.0051e+06	1.05832e+06	729325	748681	16.8	20.4	23.9	27.9	21.8	2.5	0.00404	2.29	0.00982	2.4	0.0169
P50395	Rab GDP dissociation inhibitor beta OS=Homo sapiens OX=9606 GN=GDI2 PE=1 SV=2	16	3.4363e+06	3.52732e+06	3.04527e+06	2.55594e+06	2.58855e+06	3.53955e+06	3.91629e+06	4.52606e+06	3.48235e+06	4.69328e+06	3.64709e+06	5.30294e+06	3.80725e+06	3.23505e+06	3.15727e+06	1.80156e+06	1.59319e+06	1.42139e+06	5.73034e+06	5.69878e+06	8.10107e+06	7.97224e+06	8.82206e+06	8.04058e+06	3.38499e+06	3.00411e+06	3.56445e+06	3.15052e+06	2.90816e+06	2.83695e+06	11.9	21.2	5.7	8.62	5.54	4.06	0.00139	5.16	0.000294	2.07	0.00147
P50749	Ras association domain-containing protein 2 OS=Homo sapiens OX=9606 GN=RASSF2 PE=1 SV=1	3	0	173820	109321	26287.3	0	0	22071.1	67933.9	19518.1	316559	146162	329295	150341	122140	114253	62171.1	78624.1	46412.4	81358	41197	55444.5	71252.6	172738	64941.1	227970	165486	221341	152317	114552	108524	25.8	34.3	58.7	16.7	19	-1.05	0.803	1.65	0.316	3.28	0.00445	Yes
P50914	60S ribosomal protein L14 OS=Homo sapiens OX=9606 GN=RPL14 PE=1 SV=4	4	2.36646e+06	4.18413e+06	2.83604e+06	2.74981e+06	2.38922e+06	2.63736e+06	2.3699e+06	3160897	3.11246e+06	3.6972e+06	4.36978e+06	4.54209e+06	3.21836e+06	2.61878e+06	2.94947e+06	1.19319e+06	1.87536e+06	1.13631e+06	5.94989e+06	5.19591e+06	5.64587e+06	4.82432e+06	6.05711e+06	5.97271e+06	2.66254e+06	3.29834e+06	3.05304e+06	2.55632e+06	2.34296e+06	2.59891e+06	29.3	6.78	12.3	10.7	5.49	3.99	0.00928	4.01	0.00507	2.14	0.0264
P50991	T-complex protein 1 subunit delta OS=Homo sapiens OX=9606 GN=CCT4 PE=1 SV=4	27	1.22616e+07	1.47036e+07	1.57171e+07	1.33036e+07	1.50241e+07	1.89995e+07	1.71338e+07	1.91583e+07	1.88315e+07	2.08734e+07	2.35512e+07	2.17e+07	1.65232e+07	1.64587e+07	1.41061e+07	6.52508e+06	6.60529e+06	6.44232e+06	2.88783e+07	3.33527e+07	4.08876e+07	3.50555e+07	3.69733e+07	3.62657e+07	1.50388e+07	1.78883e+07	1.4586e+07	1.31523e+07	1.46638e+07	1.25928e+07	1.25	17.7	2.69	11.3	7.95	5.27	0.00357	5.53	4.33e-06	2.43	0.0047
P50995	Annexin A11 OS=Homo sapiens OX=9606 GN=ANXA11 PE=1 SV=1	8	195047	255259	133927	501779	578641	405568	704555	532135	640844	563015	624499	670831	333191	544351	401414	143982	136116	232286	1.19748e+06	1.25839e+06	1.51872e+06	1.43424e+06	1.13429e+06	1.27536e+06	472909	405972	460528	347328	399165	365284	31.3	12.9	11.7	7.98	7.1	7.76	0.00239	7.5	0.00277	2.61	0.0217
P51617	Interleukin-1 receptor-associated kinase 1 OS=Homo sapiens OX=9606 GN=IRAK1 PE=1 SV=2	6	390161	1.17113e+06	807050	290976	35373.1	120111	203351	151759	424824	1.12224e+06	1.02315e+06	1.07774e+06	1.03075e+06	916149	286269	290911	423625	416654	658027	441842	308548	463340	440887	639763	808182	772280	883371	818718	819659	711532	19.8	37.6	21.2	6.9	7.94	1.25	0.51	1.36	0.14	2.18	0.0159	Yes
P52272	Heterogeneous nuclear ribonucleoprotein M OS=Homo sapiens OX=9606 GN=HNRNPM PE=1 SV=3	77	6.32442e+07	6.55031e+07	8.23475e+07	3.7336e+07	3.70571e+07	4.18306e+07	3.66768e+07	3.69546e+07	3.58697e+07	1.164e+08	1.12961e+08	1.13133e+08	7.0258e+07	5.79413e+07	6.00991e+07	3.19654e+07	2.93767e+07	3.30371e+07	8.02907e+07	8.0672e+07	9.0249e+07	7.47774e+07	7.08735e+07	6.93573e+07	8.38279e+07	8.58259e+07	7.60468e+07	5.58493e+07	5.19079e+07	5.30085e+07	5.98	6.74	3.9	6.31	3.8	2.66	4.89e-05	2.28	0.000123	2.6	4.85e-05
P52895	Aldo-keto reductase family 1 member C2 OS=Homo sapiens OX=9606 GN=AKR1C2 PE=1 SV=3	41	6.18025e+07	6.53707e+07	6.75605e+07	8.30285e+07	8.92374e+07	7.56309e+07	7.56935e+07	8.17713e+07	8.08631e+07	2.47317e+08	2.39042e+08	2.68548e+08	1.29546e+08	1.07317e+08	1.09356e+08	3.1446e+07	2.93677e+07	2.71263e+07	1.80869e+08	1.94186e+08	1.62076e+08	1.5552e+08	1.56545e+08	1.56087e+08	1.7811e+08	1.82999e+08	1.80518e+08	1.03086e+08	9.58648e+07	9.69933e+07	7.37	9.01	0.329	1.35	3.94	6.11	1.67e-05	5.32	0.000636	6.16	0.000377
P53004	Biliverdin reductase A OS=Homo sapiens OX=9606 GN=BLVRA PE=1 SV=2	2	110507	109260	282950	172006	139741	0	61517.3	141452	202420	293540	240887	224305	106568	81773.3	61550.9	71296	53702.5	114863	166350	308988	248511	146993	274848	181222	211393	181823	150770	101603	92796.9	57379.1	39.4	29.7	32.9	16.7	27.9	3.02	0.0186	2.51	0.0329	2.27	0.0439
P53814	Smoothelin OS=Homo sapiens OX=9606 GN=SMTN PE=1 SV=7	10	1.04368e+06	1.24961e+06	1.43679e+06	754116	750213	918260	844877	780358	839110	1.89665e+06	2.2461e+06	2.33118e+06	1.31754e+06	1.26754e+06	1.28751e+06	545060	572755	630866	1.65493e+06	1.68691e+06	2.01773e+06	1.75885e+06	1.70134e+06	2.10774e+06	1.3682e+06	1.70218e+06	1.56694e+06	1.04836e+06	1.23741e+06	1.13897e+06	7.51	11.2	11.8	10.9	8.28	3.06	0.000278	3.18	0.000337	2.65	0.000471
P54652	Heat shock-related 70 kDa protein 2 OS=Homo sapiens OX=9606 GN=HSPA2 PE=1 SV=1	26	5.2079e+07	6.44523e+07	6.91201e+07	4.0069e+07	4.27027e+07	4.172e+07	5.01894e+07	5.2946e+07	5.48268e+07	7.90374e+07	8.18391e+07	8.78833e+07	6.55475e+07	5.44671e+07	5.49493e+07	2.62671e+07	2.89024e+07	2.76943e+07	8.70607e+07	9.28668e+07	9.02661e+07	1.02169e+08	1.01459e+08	1.05211e+08	5.69188e+07	6.17728e+07	5.90721e+07	5.20639e+07	4.87305e+07	4.84183e+07	4.78	3.23	1.94	4.1	4.06	3.26	1.3e-05	3.73	7.5e-05	2.15	3.67e-05
P54762	Ephrin type-B receptor 1 OS=Homo sapiens OX=9606 GN=EPHB1 PE=1 SV=1	2	415844	400238	480685	155360	221551	207377	249056	385805	300681	869643	561719	748687	461718	349028	338308	209672	179390	192596	338279	484864	443938	506993	739303	576996	626273	423989	503241	366739	312268	298099	7.83	17.9	19.6	19.7	11.1	2.18	0.0102	3.13	0.0041	2.67	0.00654
P55084	Trifunctional enzyme subunit beta, mitochondrial OS=Homo sapiens OX=9606 GN=HADHB PE=1 SV=3	5	3.17783e+07	3.22904e+07	3.10214e+07	4.92682e+07	6.03543e+07	5.0684e+07	5.37262e+07	4.07892e+07	5.44965e+07	4.3704e+07	5.01817e+07	3.8078e+07	3.75155e+07	3.49923e+07	4.09442e+07	1.60229e+07	1.454e+07	1.24293e+07	1.06604e+08	1.31264e+08	1.09051e+08	1.09384e+08	7.81734e+07	1.04598e+08	3.14734e+07	3.79842e+07	2.55968e+07	2.98016e+07	3.13068e+07	3.60778e+07	12.6	11.7	17.3	19.6	10.1	8.07	3.32e-05	6.8	0.000238	2.21	0.00703
P55735	Protein SEC13 homolog OS=Homo sapiens OX=9606 GN=SEC13 PE=1 SV=3	1	0	0	0	61286.2	99649.5	124127	131521	0	142883	251245	0	147290	0	233246	0	2529.45	666.449	1146.71	132608	216711	265723	267731	174974	274188	180934	101664	99003.4	2485.38	6710.59	14534.4	66.8	32.8	23.2	36.6	77.3	142	0.00129	165	0.00225	87.9	0.0019
P56537	Eukaryotic translation initiation factor 6 OS=Homo sapiens OX=9606 GN=EIF6 PE=1 SV=1	3	686537	939493	572930	1.40489e+06	1.20101e+06	1.85246e+06	1.82086e+06	1.69407e+06	1.89181e+06	1.15428e+06	1.05005e+06	1.00588e+06	1.01179e+06	964857	1.30378e+06	346158	421089	229555	3.03982e+06	2.61187e+06	3.96561e+06	3.70664e+06	3.24629e+06	3.63032e+06	831256	792587	676119	803659	863236	1.14882e+06	29	21.6	6.99	10.5	19.7	9.65	0.000856	10.6	0.00391	2.31	0.0295
P56945	Breast cancer anti-estrogen resistance protein 1 OS=Homo sapiens OX=9606 GN=BCAR1 PE=1 SV=2	1	102078	122280	147943	31838.3	41255.1	44223.8	48644.6	46322.9	55918.2	157739	133195	184678	89329.4	138805	85210.4	51468.4	54806.8	59276.3	68889.9	89718.6	94671.2	99023.9	88766.9	107305	113596	100536	124134	70953.7	124186	75082.7	7.1	16.2	9.44	10.5	32.9	1.53	0.0362	1.78	0.00153	2.04	0.00121	Yes
P57088	Transmembrane protein 33 OS=Homo sapiens OX=9606 GN=TMEM33 PE=1 SV=2	5	1.24812e+06	1.60038e+06	1.34661e+06	1.83716e+06	1.87347e+06	1.68693e+06	2.22474e+06	2.10912e+06	2.03454e+06	1.85614e+06	1.32576e+06	1.74716e+06	1.85944e+06	1.55992e+06	1.39904e+06	631843	633706	546747	3.97515e+06	4.07429e+06	3.61126e+06	4.52881e+06	4.04163e+06	3.90421e+06	1.3367e+06	1.1047e+06	1.17438e+06	1.47694e+06	1.39562e+06	1.23276e+06	8.22	6.27	7.89	9.88	9.09	6.43	1.33e-05	6.88	8.79e-06	2	0.000825
P59998	Actin-related protein 2/3 complex subunit 4 OS=Homo sapiens OX=9606 GN=ARPC4 PE=1 SV=3	3	294265	334545	118232	327003	345892	487377	422630	468769	503277	521941	431110	557930	445553	355411	357116	148371	149946	149094	707551	752221	1.04334e+06	860332	898285	965771	375876	325405	375021	353899	317979	314671	0.529	21.9	5.88	8.05	6.62	5.59	0.00493	6.09	0.000315	2.41	0.00286
P60900	Proteasome subunit alpha type-6 OS=Homo sapiens OX=9606 GN=PSMA6 PE=1 SV=1	6	866465	497872	795196	833263	727794	999711	876127	1.358e+06	1.04421e+06	1.20682e+06	1.29846e+06	1.53286e+06	795644	926899	800019	440822	249823	386347	1.80297e+06	1.59205e+06	2.35878e+06	1.81162e+06	2.62493e+06	2.00592e+06	1.00172e+06	980089	1.14541e+06	664415	846488	736945	27.4	20.7	19.8	8.62	12.2	5.34	0.0021	5.98	0.0018	2.9	0.0177
P60981	Destrin OS=Homo sapiens OX=9606 GN=DSTN PE=1 SV=3	9	3.70065e+06	4.48537e+06	5.03141e+06	2.3268e+06	3.05804e+06	2.06165e+06	2.48752e+06	2.58793e+06	3.27845e+06	5.52221e+06	7.11472e+06	7.68884e+06	4.31404e+06	3.57494e+06	3.98706e+06	1.88466e+06	2.01451e+06	2.17169e+06	5.19118e+06	6.43345e+06	4.42045e+06	5.19695e+06	4.81406e+06	6.12169e+06	3.97682e+06	5.37024e+06	5.16817e+06	3.42661e+06	3.19842e+06	3.51317e+06	7.1	19	12.5	15.6	4.81	2.64	0.00653	2.66	0.000931	2.39	0.00501
P61026	Ras-related protein Rab-10 OS=Homo sapiens OX=9606 GN=RAB10 PE=1 SV=1	5	2.07284e+06	2.1361e+06	1.98032e+06	3.06232e+06	3.20708e+06	3.21702e+06	3.27835e+06	4.4869e+06	3.66284e+06	3.10402e+06	3.40201e+06	3.77851e+06	3.28141e+06	3.00044e+06	3.24407e+06	1.04864e+06	963482	795187	6.62607e+06	6.97452e+06	6.88678e+06	6.67361e+06	8.59808e+06	7.02886e+06	2.23536e+06	2.56786e+06	2.53978e+06	2.6064e+06	2.68443e+06	2.8585e+06	13.8	2.65	13.8	7.53	4.75	7.3	0.00122	7.94	5.24e-05	2.62	0.00169
P61077	Ubiquitin-conjugating enzyme E2 D3 OS=Homo sapiens OX=9606 GN=UBE2D3 PE=1 SV=1	3	443340	474538	547358	472435	607028	421070	455032	558676	655766	776269	902204	723785	524133	602834	625503	223535	243054	285049	1.03974e+06	1.32012e+06	915108	944346	1.10925e+06	1.28253e+06	559030	773676	558293	423306	539343	556695	12.5	19	15.2	19.7	14.3	4.36	0.000716	4.44	0.000255	2.52	0.00363
P61160	Actin-related protein 2 OS=Homo sapiens OX=9606 GN=ACTR2 PE=1 SV=1	1	122549	196268	89846.3	155993	140793	0	109522	219264	0	337625	291920	304738	194737	148618	318509	61790	87968.9	35998.6	337530	306188	429222	222949	420167	210088	243141	220343	204834	154678	132966	280653	42	17.9	41.4	8.65	42.1	5.78	0.0115	4.59	0.0114	3.6	0.0317
P61163	Alpha-centractin OS=Homo sapiens OX=9606 GN=ACTR1A PE=1 SV=1	1	0	0	0	0	22398.4	0	18571.1	24246.5	27439.8	0	0	31612.2	0	0	0	851.295	1936.46	2823.57	42256.5	48710.4	2775.83	37804.5	46462.8	52656.1	11934	7315.78	21248.7	4510.41	2665.75	10684.8	52.8	79.6	16.3	52.6	70.5	16.7	0.112	24.4	0.00774	7.22	0.0137
P61254	60S ribosomal protein L26 OS=Homo sapiens OX=9606 GN=RPL26 PE=1 SV=1	3	53971.5	173042	0	227019	124822	249211	148506	178834	162957	486712	442111	476712	228744	207076	375524	44916.7	78521.5	85083	491211	401759	533494	302307	452954	312708	350506	333709	320429	181690	225143	330891	31	14.1	23.6	4.5	31.2	6.84	0.00449	5.12	0.00401	4.82	0.0141
P61586	Transforming protein RhoA OS=Homo sapiens OX=9606 GN=RHOA PE=1 SV=1	7	606896	521766	1.49532e+06	622262	492662	616406	502386	319723	650761	1.61275e+06	3.68455e+06	1.91583e+06	1.07203e+06	447323	894892	330156	326736	282093	943674	1.19665e+06	873903	1.08329e+06	1.03608e+06	1.08701e+06	1.16143e+06	2.78113e+06	1.28775e+06	857376	730583	793013	8.57	16.9	2.66	51.7	7.99	3.21	0.00154	3.41	0.000759	5.57	0.024
P61956	Small ubiquitin-related modifier 2 OS=Homo sapiens OX=9606 GN=SUMO2 PE=1 SV=3	4	1.05151e+07	1.05963e+07	1.29076e+07	5.1017e+06	4.90261e+06	3.58954e+06	4.44617e+06	4.87891e+06	4.09719e+06	1.79419e+07	1.73728e+07	2.1201e+07	1.0474e+07	9.54274e+06	1.04791e+07	5.36419e+06	4.74937e+06	5.42193e+06	1.10415e+07	1.06618e+07	7.87955e+06	9.54611e+06	9.36953e+06	7.86527e+06	1.29209e+07	1.31131e+07	1.42506e+07	8.44184e+06	8.53768e+06	9.23356e+06	7.2	17.5	10.3	5.35	4.95	1.9	0.0168	1.72	0.00302	2.59	0.000106	Yes
P61964	WD repeat-containing protein 5 OS=Homo sapiens OX=9606 GN=WDR5 PE=1 SV=1	8	387040	659435	669200	752207	915206	873600	989424	805784	1.06142e+06	607791	857627	815231	652398	851758	813972	305750	318042	283649	1.96543e+06	1.99032e+06	1.87014e+06	1.82684e+06	1.55462e+06	2.06428e+06	678629	683052	585209	522827	771836	726522	5.76	3.27	14	8.51	19.7	6.42	1.21e-05	6	0.000565	2.15	0.000506
P62081	40S ribosomal protein S7 OS=Homo sapiens OX=9606 GN=RPS7 PE=1 SV=1	13	6.18915e+06	6.362e+06	7.88368e+06	3.53523e+06	3.06646e+06	3.62221e+06	3.4559e+06	3.5094e+06	3.52894e+06	1.05674e+07	1.05986e+07	1.20682e+07	5.6847e+06	5.71033e+06	5.18758e+06	3.14713e+06	2.87867e+06	3.16644e+06	7.65659e+06	7.67262e+06	8.02845e+06	7.10368e+06	6.55636e+06	6.81181e+06	7.6101e+06	7.99989e+06	8.1118e+06	4.52905e+06	5.00382e+06	4.67001e+06	5.25	2.7	4.01	3.33	5.15	2.54	0.000125	2.23	5.57e-05	2.58	5.25e-05
P62244	40S ribosomal protein S15a OS=Homo sapiens OX=9606 GN=RPS15A PE=1 SV=2	10	4.21361e+06	4.20698e+06	5.6109e+06	2.94801e+06	3.06183e+06	1.97647e+06	2.71123e+06	2.95074e+06	3.07946e+06	7.70685e+06	6.48176e+06	8.74962e+06	4.49509e+06	4.22351e+06	4.17594e+06	2.12454e+06	1.88652e+06	2.3194e+06	6.38771e+06	6.66247e+06	4.30591e+06	5.62499e+06	5.76379e+06	5.93688e+06	5.55009e+06	4.89248e+06	5.88119e+06	3.57042e+06	3.77868e+06	3.7106e+06	10.3	22.3	2.71	9.25	2.88	2.74	0.00969	2.74	0.00211	2.58	0.000319
P62249	40S ribosomal protein S16 OS=Homo sapiens OX=9606 GN=RPS16 PE=1 SV=2	13	6.20779e+06	5.8608e+06	6.98077e+06	6.00766e+06	6.68437e+06	5.93576e+06	6.2683e+06	7.55042e+06	6.72686e+06	1.45726e+07	1.32343e+07	1.54751e+07	9.32364e+06	8.2766e+06	7.97415e+06	3.13001e+06	2.62686e+06	2.79961e+06	1.30011e+07	1.45481e+07	1.27069e+07	1.27766e+07	1.44995e+07	1.31969e+07	1.04944e+07	1.04557e+07	1.04386e+07	7.41481e+06	7.4049e+06	7.02639e+06	8.96	7.37	6.66	0.274	3.04	4.7	2.71e-05	4.73	3.27e-05	3.67	0.00153
P62263	40S ribosomal protein S14 OS=Homo sapiens OX=9606 GN=RPS14 PE=1 SV=3	7	1.88211e+06	1.89682e+06	2.3254e+06	1.21206e+06	830388	1.23089e+06	1.01493e+06	1.49559e+06	2.00039e+06	3.54564e+06	3.24167e+06	3.31786e+06	1.41875e+06	1.94559e+06	1.89715e+06	954472	861629	957297	2.19441e+06	2.14005e+06	2.67669e+06	3.1786e+06	3.2116e+06	3.83867e+06	2.5534e+06	2.44683e+06	2.23015e+06	1.60279e+06	1.74252e+06	1.67706e+06	5.89	12.6	10.9	6.83	4.18	2.53	0.00155	3.69	0.00025	2.61	6.31e-05
P62269	40S ribosomal protein S18 OS=Homo sapiens OX=9606 GN=RPS18 PE=1 SV=3	2	0	871721	486700	815057	1.12644e+06	1.08209e+06	1.19008e+06	1.14381e+06	985034	966016	732002	665672	1.04267e+06	430995	919037	209743	390713	195006	1.76357e+06	2.44971e+06	2.31646e+06	2.42261e+06	2.19185e+06	1.89025e+06	695677	552520	447441	828185	385602	809805	41.1	16.7	12.3	22	37.1	8.21	0.00391	8.18	0.00601	2.13	0.0485
P62280	40S ribosomal protein S11 OS=Homo sapiens OX=9606 GN=RPS11 PE=1 SV=3	10	3.73454e+06	4.66206e+06	4.19345e+06	1.99186e+06	1.86724e+06	1.45901e+06	1.50615e+06	1.52542e+06	1.70082e+06	7.39211e+06	7.22642e+06	7.33654e+06	3.81198e+06	3.98615e+06	3.95853e+06	1.8972e+06	2.17281e+06	1.69759e+06	4.34969e+06	4.16755e+06	3.8245e+06	3.22385e+06	2.9369e+06	2.91881e+06	5.32343e+06	5.45456e+06	4.93137e+06	3.04123e+06	3.59703e+06	3.505e+06	12.4	6.48	5.65	5.2	8.81	2.14	0.00236	1.57	0.0123	2.72	0.00164
P62314	Small nuclear ribonucleoprotein Sm D1 OS=Homo sapiens OX=9606 GN=SNRPD1 PE=1 SV=1	4	746091	951138	904131	991843	1.21603e+06	949435	1.29269e+06	1.19227e+06	858034	1.31735e+06	986341	1.06525e+06	810871	916921	677613	424022	429376	369626	2.35237e+06	2.65816e+06	2.06534e+06	2.63148e+06	2.37809e+06	1.77954e+06	959655	795567	718914	652618	699414	628869	8.11	12.6	19.3	14.9	5.44	5.79	0.000105	5.55	0.00163	2.02	0.00462
P62701	40S ribosomal protein S4, X isoform OS=Homo sapiens OX=9606 GN=RPS4X PE=1 SV=2	21	3.05622e+06	3.07962e+06	3.97004e+06	5.25283e+06	5.54983e+06	4.01358e+06	4.92502e+06	5.29578e+06	4.72166e+06	1.80508e+07	1.58977e+07	1.9988e+07	8.67853e+06	7.31504e+06	8.07538e+06	1.5695e+06	1.40251e+06	1.90589e+06	1.16438e+07	1.2203e+07	8.77942e+06	1.00805e+07	9.77921e+06	9.35852e+06	1.30019e+07	1.20565e+07	1.34352e+07	7.09472e+06	6.60174e+06	7.1765e+06	15.8	16.9	3.72	5.49	4.47	6.69	0.000174	5.99	0.00154	7.89	0.00064
P62753	40S ribosomal protein S6 OS=Homo sapiens OX=9606 GN=RPS6 PE=1 SV=1	3	1.51637e+06	2.12382e+06	1.79254e+06	2250244	2.66878e+06	3.33331e+06	3.03612e+06	2.68326e+06	3.24237e+06	2.82829e+06	2.48779e+06	2.37808e+06	2.79984e+06	2.10662e+06	2.35924e+06	775637	958382	720039	4.91367e+06	5.84179e+06	6.79992e+06	6.18544e+06	5.14183e+06	6.23493e+06	2.14299e+06	1.8778e+06	1.59846e+06	2.22389e+06	1.88891e+06	2.1007e+06	15.2	16.1	10.5	14.5	8.18	7.15	0.000108	7.16	9.17e-05	2.29	0.00234
P62829	60S ribosomal protein L23 OS=Homo sapiens OX=9606 GN=RPL23 PE=1 SV=1	7	3.21434e+06	3.37317e+06	4.26287e+06	1.47375e+06	1.14078e+06	1.77622e+06	1.86377e+06	2.04671e+06	2.42454e+06	4.36743e+06	5.14953e+06	4.73792e+06	3.32788e+06	2.64117e+06	2.85923e+06	1.62069e+06	1.51188e+06	1.708e+06	3.19088e+06	3.44283e+06	3.8308e+06	4.29177e+06	3.9263e+06	4.66036e+06	3.14521e+06	3.8869e+06	3.18466e+06	2.64331e+06	2.363e+06	2.51939e+06	6.09	9.24	8.55	12.3	5.6	2.16	0.000576	2.66	0.00017	2.11	0.0024
P62861	40S ribosomal protein S30 OS=Homo sapiens OX=9606 GN=FAU PE=1 SV=1	2	374422	455082	575350	1.00057e+06	1.05344e+06	1.02432e+06	1.68815e+06	1.38626e+06	1.50377e+06	687127	859262	719954	837967	731126	775515	188787	203972	230525	2.16497e+06	2.29095e+06	2.1928e+06	3.43649e+06	2.65643e+06	2.88569e+06	494835	648577	483928	665591	654123	683341	10.2	2.99	13.4	17	2.2	10.7	0.000236	14.4	1.75e-05	2.61	0.00217
P62906	60S ribosomal protein L10a OS=Homo sapiens OX=9606 GN=RPL10A PE=1 SV=2	6	933683	783936	2.26294e+06	1.68081e+06	933935	1.16468e+06	1.08912e+06	1.88615e+06	1.95926e+06	4.6399e+06	4.95022e+06	5.99598e+06	2.64999e+06	2.24999e+06	2.4903e+06	489080	410236	909774	3.63685e+06	2.63386e+06	2.81012e+06	2.22347e+06	4.55556e+06	3.75976e+06	3.34143e+06	4.02461e+06	4.03029e+06	2.10487e+06	2.01302e+06	2.19431e+06	44.5	17.7	33.7	10.4	4.31	5.02	0.0112	5.83	0.00551	6.3	0.0117
P62913	60S ribosomal protein L11 OS=Homo sapiens OX=9606 GN=RPL11 PE=1 SV=2	8	2.23583e+06	2.86253e+06	3.20148e+06	3.02418e+06	3.13676e+06	3.46107e+06	3.54503e+06	3.4635e+06	3.94054e+06	6230158	7.63937e+06	7.68859e+06	4.46453e+06	3.88984e+06	3.74971e+06	1.13391e+06	1.28904e+06	1.28543e+06	6.54613e+06	6.82724e+06	7.40921e+06	7.21648e+06	6.63699e+06	7.56176e+06	4.48665e+06	5.76626e+06	5.16801e+06	3.54614e+06	3.48016e+06	3.30404e+06	7.16	6.35	6.55	12.5	3.63	5.6	8.02e-06	5.77	7.3e-06	4.16	0.000298
P62917	60S ribosomal protein L8 OS=Homo sapiens OX=9606 GN=RPL8 PE=1 SV=2	3	1.72421e+06	1.75643e+06	2.97826e+06	1.04973e+06	1.74329e+06	709439	2.34005e+06	1.4553e+06	1.56061e+06	4.89702e+06	4.42823e+06	4.43348e+06	2.39648e+06	1.82587e+06	2.31606e+06	869361	787248	1.32742e+06	2.27912e+06	3.79936e+06	1.54609e+06	4.76356e+06	2.78874e+06	2.99476e+06	3.52659e+06	3.34246e+06	2.98003e+06	1.90351e+06	1.63357e+06	2.04078e+06	29.3	45.2	30.9	8.47	11.1	2.56	0.0536	3.53	0.00562	3.3	0.0112
P62937	Peptidyl-prolyl cis-trans isomerase A OS=Homo sapiens OX=9606 GN=PPIA PE=1 SV=2	19	9.91517e+06	1.24655e+07	1.54797e+07	5.77186e+06	6.46009e+06	6.8881e+06	7.33292e+06	6.9595e+06	6.6812e+06	1.6827e+07	1.69269e+07	1.66399e+07	1.01626e+07	1.0028e+07	9.08168e+06	5.04156e+06	5.65625e+06	6.23497e+06	1.24995e+07	1.41803e+07	1.47821e+07	1.49422e+07	1.33362e+07	1.29911e+07	1.2118e+07	1.29681e+07	1.11848e+07	8.0721e+06	8.97185e+06	8.04352e+06	10.6	8.56	7.57	7.38	6.31	2.45	0.000429	2.44	0.000524	2.14	0.000909
P63244	Receptor of activated protein C kinase 1 OS=Homo sapiens OX=9606 GN=RACK1 PE=1 SV=3	19	5.18818e+06	6.60913e+06	6.69429e+06	6.64825e+06	6.92226e+06	7.5867e+06	7.97842e+06	7.07525e+06	8.193e+06	1.4956e+07	1.38308e+07	1.64898e+07	9.35464e+06	9.30091e+06	9.39677e+06	2.7133e+06	3.0127e+06	3.38181e+06	1.44418e+07	1.5077e+07	1.62918e+07	1.62519e+07	1.38675e+07	1.60216e+07	1.07706e+07	1.04396e+07	1.10839e+07	7.44343e+06	8.58483e+06	8.32482e+06	11	6.16	8.55	2.99	7.37	5.03	0.000152	5.07	5.36e-05	3.55	0.00138
P68402	Platelet-activating factor acetylhydrolase IB subunit beta OS=Homo sapiens OX=9606 GN=PAFAH1B2 PE=1 SV=1	1	56027.1	79566.9	91300.1	18775.8	41851.8	64047.5	87589.3	48640.3	64428.8	79604.6	90755.2	118062	71316.8	72707	43406	28249.3	35662.6	36581.1	40626	91016.3	137108	178302	93207.7	123637	57327.3	68502.7	79357.5	56646.4	65049.4	38247	13.6	53.9	32.7	16.1	25.7	2.67	0.128	3.93	0.00955	2.04	0.00495
P78344	Eukaryotic translation initiation factor 4 gamma 2 OS=Homo sapiens OX=9606 GN=EIF4G2 PE=1 SV=1	66	4.30054e+07	5.20193e+07	5.21556e+07	1.96739e+07	1.79977e+07	1.73216e+07	1.66957e+07	2.0024e+07	1.95531e+07	6.28775e+07	6.82117e+07	1.08799e+08	4.08049e+07	3.5484e+07	3.63083e+07	2.19886e+07	2.33903e+07	2.41241e+07	4.07418e+07	4.10833e+07	3.73452e+07	3.46788e+07	3.6623e+07	3.77518e+07	4.72105e+07	5.1648e+07	7.37369e+07	3.25107e+07	3.18008e+07	3.10857e+07	4.68	5.2	4.28	24.7	2.24	1.71	0.000207	1.57	0.00027	2.48	0.0193	Yes
P78347	General transcription factor II-I OS=Homo sapiens OX=9606 GN=GTF2I PE=1 SV=2	43	1.84324e+07	1.88447e+07	2.18736e+07	8.06612e+06	9.60089e+06	7.59533e+06	7.33237e+06	8.58827e+06	8.3776e+06	3.09693e+07	3.28226e+07	3.67107e+07	1.93774e+07	1.64535e+07	1.91297e+07	9.30456e+06	8.51208e+06	9.13729e+06	1.76721e+07	2.12988e+07	1.59366e+07	1.50084e+07	1.70521e+07	1.69455e+07	2.2422e+07	2.49216e+07	2.46806e+07	1.54526e+07	1.49143e+07	1.69383e+07	4.65	14.9	7.04	5.74	6.65	2.04	0.00891	1.82	0.00062	2.67	3.2e-05
P78371	T-complex protein 1 subunit beta OS=Homo sapiens OX=9606 GN=CCT2 PE=1 SV=4	39	9.94075e+06	1.02125e+07	1.33742e+07	7.68417e+06	8.50187e+06	9.26766e+06	8.77596e+06	9.29859e+06	9.61355e+06	1.45595e+07	1.59785e+07	2.00096e+07	1.07965e+07	9.16683e+06	9.89806e+06	5.33699e+06	4.71922e+06	5.87552e+06	1.65094e+07	1.92447e+07	1.94239e+07	1.7888e+07	1.85289e+07	1.88521e+07	1.06042e+07	1.19874e+07	1.35763e+07	8.88517e+06	8.24753e+06	8.79215e+06	10.9	8.88	2.66	12.3	3.99	3.46	0.00014	3.47	0.0016	2.27	0.00108
P98088	Mucin-5AC OS=Homo sapiens OX=9606 GN=MUC5AC PE=1 SV=4	45	5.8916e+06	3.29148e+06	2.92024e+06	1.54786e+07	6.32377e+06	4.18053e+06	1.2057e+07	4.92325e+06	4.47432e+06	1.45833e+07	6.76392e+06	5.29308e+06	6.40675e+06	6.03984e+06	5.41862e+06	2.75018e+06	1.73728e+06	2.27072e+06	3.18418e+07	1.6003e+07	1.24684e+07	2.18648e+07	9.80366e+06	1.08362e+07	9.75232e+06	5.78381e+06	4.6069e+06	5.39952e+06	5.58183e+06	5.13769e+06	22.5	51.3	47.2	40.2	4.16	8.92	0.00743	6.29	0.00792	2.98	0.0223
P99999	Cytochrome c OS=Homo sapiens OX=9606 GN=CYCS PE=1 SV=2	8	3.87358e+06	3.72819e+06	3.40899e+06	3.9282e+06	4.47698e+06	3.05803e+06	4.79843e+06	4.43275e+06	4.55848e+06	4.1274e+06	5.07347e+06	4.80979e+06	3.43601e+06	3.57388e+06	3.71884e+06	1.95466e+06	1.67442e+06	1.39424e+06	8.70339e+06	9.74621e+06	6.54642e+06	9.76798e+06	8.49431e+06	8.74757e+06	2.97802e+06	3.8295e+06	3.23491e+06	2.83294e+06	3.19953e+06	3.29455e+06	16.7	19.6	7.49	13	7.84	4.98	0.000573	5.38	0.000904	2	0.00583
Q00535	Cyclin-dependent-like kinase 5 OS=Homo sapiens OX=9606 GN=CDK5 PE=1 SV=3	2	0	9262.46	12195.9	21936.6	0	0	0	9552.92	49276.7	129914	119365	102825	0	85034.1	50025.6	7032.34	9244.36	8253.61	57886.3	19386.8	15712.7	40978.3	24719.9	94560.2	93557.6	90097.3	69115.6	73939.4	76078.1	46822.6	13.6	75.4	68.4	15.7	24.9	3.79	0.0973	6.53	0.0428	10.3	5.99e-05
Q02539	Histone H1.1 OS=Homo sapiens OX=9606 GN=H1-1 PE=1 SV=3	15	4.51372e+07	5.83394e+07	6.50658e+07	7.88695e+07	9.38001e+07	7.91656e+07	8.50242e+07	7.60066e+07	9.22653e+07	6.40586e+07	8.93444e+07	5.7153e+07	6.86465e+07	6.60328e+07	6.93478e+07	2.27613e+07	2.61536e+07	2.61304e+07	1.7067e+08	2.03999e+08	1.6949e+08	1.73085e+08	1.45803e+08	1.77058e+08	4.61673e+07	6.74465e+07	3.84309e+07	5.45572e+07	5.91079e+07	6.11292e+07	7.8	10.8	10.3	29.6	5.78	7.25	2.34e-05	6.61	2.99e-05	2.03	0.0459
Q04206	Transcription factor p65 OS=Homo sapiens OX=9606 GN=RELA PE=1 SV=2	8	4.42787e+06	4.28998e+06	5.25012e+06	1.76256e+06	2.20644e+06	2.47381e+06	3.19609e+06	3.43698e+06	4.51239e+06	7.81303e+06	7.24606e+06	7.63209e+06	4.26678e+06	3.30118e+06	3.96503e+06	2.24174e+06	1.92573e+06	2.25065e+06	3.83098e+06	4.83798e+06	5.30065e+06	6.26702e+06	6.63682e+06	8.66814e+06	5.62655e+06	5.46938e+06	5.16055e+06	3.38907e+06	2.95349e+06	3.49377e+06	8.65	16.1	18	4.38	8.74	2.18	0.0056	3.36	0.00177	2.53	0.000581
Q04323	UBX domain-containing protein 1 OS=Homo sapiens OX=9606 GN=UBXN1 PE=1 SV=2	2	287650	525328	348802	343640	486089	469726	469426	512340	483354	562390	619490	510015	356617	311675	357585	145036	235456	139754	743549	1.05711e+06	1.00556e+06	955593	981778	927540	405005	467596	342815	283258	278849	315085	31	18	2.84	15.4	6.76	5.39	0.00199	5.51	0.00875	2.34	0.0189
Q04828	Aldo-keto reductase family 1 member C1 OS=Homo sapiens OX=9606 GN=AKR1C1 PE=1 SV=1	39	7.00813e+07	7.46753e+07	7.33726e+07	8.39586e+07	9.00221e+07	7.77757e+07	8.0624e+07	8.67026e+07	8.46671e+07	2.33485e+08	2.28075e+08	2.67039e+08	1.26782e+08	1.07946e+08	1.10547e+08	3.54714e+07	3.352e+07	2.94294e+07	1.82436e+08	1.95794e+08	1.67129e+08	1.65485e+08	1.65863e+08	1.63503e+08	1.68156e+08	1.74015e+08	1.79511e+08	1.00808e+08	9.65069e+07	9.80195e+07	9.4	7.89	0.769	3.27	2.22	5.54	2.42e-05	5.03	0.00109	5.3	0.000364
Q04837	Single-stranded DNA-binding protein, mitochondrial OS=Homo sapiens OX=9606 GN=SSBP1 PE=1 SV=1	12	5.3921e+06	6.30364e+06	4.51054e+06	6.59536e+06	6.57774e+06	6.92551e+06	8.36822e+06	8.59086e+06	8.02536e+06	8.3893e+06	8.11788e+06	8.68928e+06	6.512e+06	6.0538e+06	5.76577e+06	2.73346e+06	2.95016e+06	2.04977e+06	1.5138e+07	1.43078e+07	1.51426e+07	1.70755e+07	1.64878e+07	1.54094e+07	6.06298e+06	6.14518e+06	6.1778e+06	5.17415e+06	5.10823e+06	5.1405e+06	18.2	3.23	5.18	0.965	0.641	5.77	0.00318	6.33	0.00206	2.38	0.0154
Q05519	Serine/arginine-rich splicing factor 11 OS=Homo sapiens OX=9606 GN=SRSF11 PE=1 SV=1	3	194471	462743	168979	430656	386275	779827	391523	465751	688086	306971	295865	410613	370307	319388	202179	98883.8	141990	70867.7	931830	840044	1.6694e+06	797007	892502	1.32041e+06	221065	322756	276000	294132	285749	242729	34.5	39.6	27.8	18.6	10.1	11	0.00125	9.66	0.00113	2.63	0.021
Q07020	60S ribosomal protein L18 OS=Homo sapiens OX=9606 GN=RPL18 PE=1 SV=2	5	1.14022e+06	1.2072e+06	1.84912e+06	1.26073e+06	1.25763e+06	1.43716e+06	1.54141e+06	1.26106e+06	1.11864e+06	3.32413e+06	3.31844e+06	3.26727e+06	1.8101e+06	2.41282e+06	2.2685e+06	574908	598886	740888	2.72789e+06	2.96385e+06	3.07657e+06	3.13779e+06	2.41652e+06	2.14664e+06	2.39387e+06	2.50478e+06	2.19615e+06	1.43775e+06	2.1587e+06	1.99888e+06	14.1	6.09	20	6.61	20.3	4.58	0.000605	4.02	0.000922	3.71	0.000756
Q07666	KH domain-containing, RNA-binding, signal transduction-associated protein 1 OS=Homo sapiens OX=9606 GN=KHDRBS1 PE=1 SV=1	6	2.28257e+06	1.86919e+06	2.12704e+06	2.12827e+06	2.41906e+06	2.72854e+06	2.76406e+06	2.41562e+06	3.25475e+06	2.84428e+06	3.34308e+06	2.58048e+06	2.75188e+06	2.18023e+06	2.1741e+06	1.15089e+06	837785	852241	4.60504e+06	5.26079e+06	5.84107e+06	5.62669e+06	4.62896e+06	6.24575e+06	2.04831e+06	2.52338e+06	1.73451e+06	2.1858e+06	1.95061e+06	1.9157e+06	18.7	11.8	14.8	18.9	7.28	5.53	0.000359	5.81	0.000234	2.22	0.00604
Q08188	Protein-glutamine gamma-glutamyltransferase E OS=Homo sapiens OX=9606 GN=TGM3 PE=1 SV=4	11	1.5092e+06	1.48075e+06	1.09521e+06	1.69884e+06	1.12818e+06	1.80206e+06	1.3624e+06	2.23168e+06	1.64853e+06	2.12467e+06	1.1379e+06	2.65226e+06	1.48384e+06	1.33511e+06	1.39923e+06	872493	690541	450034	3.71688e+06	2.48343e+06	3.91528e+06	2.89e+06	4.29042e+06	3.26404e+06	1.53008e+06	1.20694e+06	1.82499e+06	1.24982e+06	1.22428e+06	1.24848e+06	31.6	23	20.8	20.3	1.16	5.02	0.00333	5.19	0.00377	2.27	0.0289
Q12905	Interleukin enhancer-binding factor 2 OS=Homo sapiens OX=9606 GN=ILF2 PE=1 SV=2	3	98165.6	81082.8	49347.8	73809.3	94610.2	48664.5	166747	182621	157570	329555	274681	227483	54676.1	152243	234604	50298	45906.6	74652.6	180864	211219	147977	353055	353131	304336	237329	207331	196587	177029	150537	206720	27.2	17.6	8.36	9.88	15.8	3.16	0.0045	5.91	0.00355	3.75	0.00628
Q12926	ELAV-like protein 2 OS=Homo sapiens OX=9606 GN=ELAVL2 PE=1 SV=2	4	7.25797e+07	9.80594e+07	5.89929e+07	1.01437e+08	7.79392e+07	1.35744e+08	8.38886e+07	1.38343e+08	7.09603e+07	1.17206e+08	6.41271e+07	1.13648e+08	9.79208e+07	9.1784e+07	9.02471e+07	3.65961e+07	4.39568e+07	2.36366e+07	2.19486e+08	1.695e+08	2.9059e+08	1.70769e+08	2.65112e+08	1.36221e+08	8.43062e+07	4.8417e+07	7.63922e+07	7.77778e+07	8.21172e+07	7.96502e+07	29.6	26.9	35	27.1	2.73	6.52	0.00162	5.49	0.00325	2.01	0.0494
Q13049	E3 ubiquitin-protein ligase TRIM32 OS=Homo sapiens OX=9606 GN=TRIM32 PE=1 SV=2	1	27470.4	29215.1	0	0	0	0	0	0	0	46134.1	47372.6	78372.7	22222.3	24414	31495.4	13850.8	13094.4	9711.48	1934.8	2883.6	38588.5	17102.6	14599.3	3060.22	33223.5	35757.2	52679.4	17651	21842.7	27752	18	144	64.6	26.1	22.6	1.18	0.534	-1.05	0.665	3.32	0.00341	Yes
Q13085	Acetyl-CoA carboxylase 1 OS=Homo sapiens OX=9606 GN=ACACA PE=1 SV=2	194	1.61726e+08	1.74827e+08	1.98629e+08	2.70293e+08	2.87227e+08	2.42417e+08	2.50715e+08	263900780	2.54653e+08	2.50574e+08	2.43686e+08	2.56895e+08	2.24235e+08	2.07924e+08	2.05433e+08	8.20107e+07	7.84831e+07	7.78765e+07	5.85196e+08	6.26713e+08	5.06262e+08	5.45073e+08	5.05458e+08	4.89578e+08	1.81171e+08	1.84467e+08	1.73238e+08	1.78422e+08	1.86254e+08	1.88652e+08	2.81	10.7	5.57	3.21	2.9	7.21	0.000532	6.46	1.74e-05	2.26	6.11e-06
Q13098	COP9 signalosome complex subunit 1 OS=Homo sapiens OX=9606 GN=GPS1 PE=1 SV=4	1	0	0	86908.5	136108	141985	110361	95258.2	87530.5	139523	320031	557184	632424	531434	423474	530250	16971.2	6306.64	34821.6	294503	308779	236253	193913	167731	267739	230470	420566	425093	422114	378873	467228	74.4	13.7	24.7	31	10.5	14.4	0.0256	10.8	0.0276	18.5	0.0142
Q13148	TAR DNA-binding protein 43 OS=Homo sapiens OX=9606 GN=TARDBP PE=1 SV=1	15	6.37157e+06	6.44889e+06	7.38388e+06	3.07459e+06	3.87449e+06	3.38255e+06	3.11694e+06	3.22966e+06	3.52424e+06	1.15369e+07	1.13926e+07	1.26456e+07	6.67282e+06	5.08263e+06	4.87233e+06	3.23093e+06	2.93599e+06	3.08927e+06	6.73818e+06	8.53072e+06	7.32719e+06	6.39244e+06	6.23696e+06	6.84335e+06	8.33905e+06	8.60659e+06	8.56547e+06	5.3167e+06	4.61679e+06	4.3285e+06	4.78	12.1	4.85	1.69	10.7	2.44	0.00232	2.1	4.54e-05	2.76	0.000206
Q13151	Heterogeneous nuclear ribonucleoprotein A0 OS=Homo sapiens OX=9606 GN=HNRNPA0 PE=1 SV=1	10	4.79096e+06	5.50241e+06	4.96998e+06	4.2027e+06	4.17641e+06	3.67205e+06	3.84766e+06	4.92797e+06	4.76472e+06	1.12927e+07	1.1845e+07	1.4469e+07	6.98571e+06	6.11909e+06	6.18475e+06	2.3315e+06	2.47024e+06	2.64237e+06	9.13812e+06	9.11174e+06	7.874e+06	7.84025e+06	9.44535e+06	9.27097e+06	8.13245e+06	9.06088e+06	9.72559e+06	5.56627e+06	5.48461e+06	5.35013e+06	6.28	8.3	9.95	8.92	2	3.51	6.29e-05	3.57	0.000193	3.62	8.19e-05
Q13310	Polyadenylate-binding protein 4 OS=Homo sapiens OX=9606 GN=PABPC4 PE=1 SV=1	27	1.40048e+07	1.48023e+07	1.72322e+07	8.58893e+06	1.02886e+07	1.06144e+07	9.83237e+06	1.04743e+07	1.08373e+07	2.24966e+07	2.25749e+07	2.28116e+07	1.62447e+07	1.30855e+07	1.40429e+07	7.1151e+06	6.6391e+06	6.84131e+06	1.88952e+07	2.24068e+07	1.96762e+07	2.01365e+07	2.01197e+07	2.14431e+07	1.62301e+07	1.70547e+07	1.53584e+07	1.29187e+07	1.17194e+07	1.23835e+07	3.48	9.07	3.69	5.23	4.87	2.96	0.000682	3	3.04e-06	2.36	5.81e-05
Q13867	Bleomycin hydrolase OS=Homo sapiens OX=9606 GN=BLMH PE=1 SV=1	4	820075	627826	462662	701909	629787	831222	852004	1.11422e+06	791713	1.49832e+06	802056	1.38815e+06	743611	646387	877817	414710	296178	201925	1.85476e+06	1.36962e+06	1.77942e+06	1.73439e+06	2.13515e+06	1.51927e+06	1.07902e+06	689389	933067	595440	580172	632298	35	15.7	17.4	21.9	4.45	5.48	0.00601	5.9	0.00507	2.96	0.0156
Q14116	Interleukin-18 OS=Homo sapiens OX=9606 GN=IL18 PE=1 SV=1	4	792617	768690	862076	327021	365137	549144	513310	461954	530518	1.27003e+06	904112	1.41286e+06	662553	798091	722507	407765	348147	345407	828097	808539	1.18107e+06	1.04794e+06	897584	1.02022e+06	914610	873559	949678	531717	731900	652654	9.6	22.3	8.09	4.17	15.8	2.56	0.00814	2.69	0.000178	2.49	0.000912
Q14686	Nuclear receptor coactivator 6 OS=Homo sapiens OX=9606 GN=NCOA6 PE=1 SV=3	2	64507.8	76692.9	0	0	0	0	21239.7	0	13560.4	39052.2	119109	102758	0	0	0	39688.2	36276.6	28108.1	67729.9	12225.7	43410.5	50231.4	56767.4	31449.2	60108.1	89904.6	69070.3	10931.1	24347.1	5061.3	17.2	67.7	28.5	20.9	73.5	1.19	0.946	1.33	0.286	2.11	0.00957	Yes
Q14687	Genetic suppressor element 1 OS=Homo sapiens OX=9606 GN=GSE1 PE=1 SV=3	3	101097	229666	60841.9	108795	127937	172943	54844.2	167580	167756	356067	201879	261342	158661	122000	128389	51758	102938	86009.7	235405	352670	370224	226007	321127	321917	256422	152380	175665	126023	109151	113129	32.5	22.9	19	28	7.6	3.98	0.007	3.61	0.01	2.43	0.0281
Q14697	Neutral alpha-glucosidase AB OS=Homo sapiens OX=9606 GN=GANAB PE=1 SV=3	16	2.36942e+06	2.50282e+06	2.23755e+06	2.97328e+06	4.32718e+06	3.21222e+06	4.33047e+06	4.43546e+06	3.96432e+06	3.76146e+06	4.66258e+06	3.89658e+06	2.89091e+06	3.06701e+06	3.02275e+06	1.21956e+06	1.13136e+06	1.0142e+06	6.46416e+06	9.41575e+06	6.91886e+06	8.81536e+06	8.4995e+06	7.94987e+06	2.87074e+06	3.51935e+06	2.80066e+06	2.43616e+06	2.57142e+06	2.66715e+06	9.18	20.9	5.2	12.9	4.54	6.78	0.00091	7.51	4.13e-05	2.73	0.000572
Q14997	Proteasome activator complex subunit 4 OS=Homo sapiens OX=9606 GN=PSME4 PE=1 SV=2	1	942330	886773	734294	1.94069e+06	2729853	1.90834e+06	2.45246e+06	4.01468e+06	2575454	1.84818e+06	1.49796e+06	1.94438e+06	1.90006e+06	1.65644e+06	1.51604e+06	475130	397459	294209	4.19916e+06	5.93669e+06	4.08524e+06	4.99237e+06	7.69319e+06	4.94221e+06	1.33097e+06	1.13067e+06	1.30695e+06	1.50921e+06	1.48198e+06	1.33585e+06	23.3	21.9	26.8	8.71	6.46	12.2	0.000195	15.1	0.00018	3.23	0.00737
Q15036	Sorting nexin-17 OS=Homo sapiens OX=9606 GN=SNX17 PE=1 SV=1	5	336968	158434	162430	179300	190308	49419.2	139509	161870	357747	641788	720357	794185	273978	371085	421960	169902	104877	107525	390884	436275	476976	428041	330178	686504	462184	543730	533824	217619	332002	371808	28.9	9.91	38.2	8.67	26.1	3.41	0.00869	3.78	0.00985	4.03	0.00717
Q15434	RNA-binding motif, single-stranded-interacting protein 2 OS=Homo sapiens OX=9606 GN=RBMS2 PE=1 SV=1	6	850272	601556	837954	349141	394354	360993	721861	203238	380912	1.58459e+06	1.15268e+06	1.28089e+06	820604	474174	662698	347828	272795	377235	915325	862828	890656	1.50524e+06	724038	744608	993482	891754	863344	654835	574238	589236	16.2	2.95	44.9	7.47	7.07	2.67	0.00798	2.98	0.0348	2.75	0.00348
Q15646	2'-5'-oligoadenylate synthase-like protein OS=Homo sapiens OX=9606 GN=OASL PE=1 SV=2	6	379899	462429	458740	882964	620753	573448	585133	676468	937406	744941	1.43869e+06	1.39029e+06	639600	453841	699696	194851	220090	199885	1.91051e+06	1.35559e+06	1.4326e+06	1.20571e+06	1.31721e+06	1.38041e+06	862301	1.08594e+06	934503	548406	426186	489958	6.52	19.2	6.8	11.9	12.5	7.64	0.00109	6.35	4.65e-06	4.69	0.00022
Q15678	Tyrosine-protein phosphatase non-receptor type 14 OS=Homo sapiens OX=9606 GN=PTPN14 PE=1 SV=2	3	724899	545804	663456	461118	549578	589754	474364	521006	593578	1.10074e+06	1.03721e+06	1.16478e+06	644254	710987	881498	365500	244634	265826	997742	1.19518e+06	1.2625e+06	965644	998385	1.13906e+06	792695	782891	782923	511726	636105	776728	22.1	11.9	8.91	0.719	20.7	3.94	0.0017	3.54	0.00382	2.69	0.0144
Q15717	ELAV-like protein 1 OS=Homo sapiens OX=9606 GN=ELAVL1 PE=1 SV=2	17	7.73494e+07	1.03477e+08	6.4489e+07	1.04734e+08	8.20114e+07	1.38574e+08	8.72771e+07	1.43191e+08	7.48659e+07	1.26089e+08	7.41465e+07	1.22858e+08	1.03818e+08	9.68439e+07	9.59918e+07	3.89453e+07	4.63926e+07	2.62048e+07	2.26634e+08	1.78381e+08	2.97423e+08	1.77733e+08	2.73463e+08	1.43726e+08	9.08132e+07	5.59732e+07	8.23441e+07	8.24736e+07	8.6853e+07	8.47047e+07	27.5	25.6	33.9	23.8	2.59	6.3	0.00129	5.33	0.00292	2.05	0.0326
Q15843	NEDD8 OS=Homo sapiens OX=9606 GN=NEDD8 PE=1 SV=1	3	418741	641204	1.12318e+06	350623	485284	381434	391027	401879	366690	842269	1.13106e+06	955783	610849	596166	407324	323123	287393	450025	761425	1.08902e+06	1.03634e+06	833813	801891	915290	606560	904005	642444	491564	552335	376049	24.2	18.3	6.88	22.6	18.9	2.72	0.00495	2.41	0.0157	2.03	0.018
Q16186	Proteasomal ubiquitin receptor ADRM1 OS=Homo sapiens OX=9606 GN=ADRM1 PE=1 SV=2	3	202525	321744	159444	142418	79679.7	149258	65430.5	62237	135964	300762	383526	337472	127781	179010	178335	104283	144208	67658	308157	284445	319521	135211	121618	260910	216594	289488	226837	115409	168974	178815	36.3	5.89	44.5	16.2	22.1	2.89	0.0345	1.64	0.213	2.32	0.0418
Q16610	Extracellular matrix protein 1 OS=Homo sapiens OX=9606 GN=ECM1 PE=1 SV=2	2	2.35554e+06	3.70783e+06	3.86156e+06	3.81774e+06	4.91438e+06	7.41122e+06	4.98368e+06	4.98944e+06	5.04629e+06	5.32066e+06	6.14762e+06	3.79873e+06	3.98554e+06	2.42593e+06	2.52384e+06	1.04764e+06	1.66261e+06	1.55015e+06	8.26062e+06	1.06874e+07	1.62957e+07	1.01451e+07	9.56323e+06	9.68633e+06	3.83167e+06	4.64027e+06	2.6268e+06	3.16569e+06	2.17042e+06	2.22387e+06	23.1	35.1	3.13	27.4	22.2	8.27	0.00153	6.9	0.00484	2.61	0.0132
Q16658	Fascin OS=Homo sapiens OX=9606 GN=FSCN1 PE=1 SV=3	14	6.64402e+06	6.37385e+06	7.49676e+06	4.00367e+06	5.30676e+06	4.26146e+06	5.23925e+06	5.5553e+06	6.49274e+06	9.21204e+06	8.38069e+06	1.01907e+07	6.32864e+06	6.25544e+06	6.61594e+06	3.36876e+06	2.87439e+06	3.01001e+06	8.84755e+06	1.06048e+07	9.24202e+06	1.07073e+07	1.06831e+07	1.24874e+07	6.63405e+06	6.68135e+06	6.8851e+06	5.48976e+06	5.63262e+06	5.8296e+06	8.28	9.64	9.16	1.98	3.02	3.1	0.000111	3.66	5.28e-05	2.18	0.00234
Q2M2I8	AP2-associated protein kinase 1 OS=Homo sapiens OX=9606 GN=AAK1 PE=1 SV=3	7	1.19048e+07	1.17863e+07	8.42178e+06	1.56812e+07	1.11653e+07	17148486	1.19409e+07	2.03713e+07	1.44364e+07	1.55586e+07	1.25115e+07	2.5743e+07	1.6206e+07	1.46857e+07	1.26545e+07	6.0133e+06	5.29414e+06	3.3806e+06	3.40031e+07	2.43771e+07	3.67711e+07	2.43651e+07	3.90618e+07	2.77843e+07	1.12184e+07	9.45017e+06	1.73036e+07	1.30247e+07	1.3139e+07	1.11504e+07	27.8	20.5	25.3	32.5	8.98	6.48	0.00143	6.21	0.00147	2.59	0.0197
Q2M389	WASH complex subunit 4 OS=Homo sapiens OX=9606 GN=WASHC4 PE=1 SV=2	2	0	51190.5	104464	0	20683.1	10752.3	0	18441.3	37588.9	109653	69659.3	94837.4	27323.5	31754.5	40118.2	23455.6	23948.4	43161.9	35523.1	47535.9	38207.7	53276.7	39030.7	72131.9	78966.7	52579.3	63746.4	24781.8	47480.3	42127.2	37.2	15.6	30.3	20.3	31.1	1.34	0.24	1.82	0.0864	2.16	0.0368	Yes
Q3MHD2	Protein LSM12 homolog OS=Homo sapiens OX=9606 GN=LSM12 PE=1 SV=2	3	218537	161561	152551	127631	229718	205680	188398	190342	185120	632468	634283	589375	347839	354034	255232	110188	75194.6	79064.9	276161	499575	440305	383515	364746	355239	455472	478761	396158	276286	316746	224896	21.8	28.6	3.91	9.6	16.9	4.6	0.00367	4.17	0.00549	5.03	0.00148
Q460N5	Protein mono-ADP-ribosyltransferase PARP14 OS=Homo sapiens OX=9606 GN=PARP14 PE=1 SV=3	17	1.55817e+06	2.05205e+06	4.14178e+06	559694	482576	641799	595570	592167	927124	2.55141e+06	1.90325e+06	2.75918e+06	1.62135e+06	1470084	1.2409e+06	727697	934314	833600	1.31994e+06	1.32628e+06	1.48831e+06	1.28594e+06	1.23607e+06	1.71915e+06	1.84634e+06	1.6522e+06	1.85463e+06	1.35024e+06	1.32159e+06	1.16161e+06	12.4	6.92	18.8	6.42	7.95	1.66	0.00783	1.7	0.0182	2.15	0.00248	Yes
Q53EP0	Fibronectin type III domain-containing protein 3B OS=Homo sapiens OX=9606 GN=FNDC3B PE=1 SV=2	3	29907.6	0	27781.7	39619.7	0	78640.1	96460.1	66395.7	76675.7	284911	278062	269880	26785.6	98947.5	60803.3	18352.6	25346.3	20252	92381.1	134103	191296	215157	146945	149492	205179	209883	181404	32500.8	95897.4	79115.8	17	35.7	22.7	7.68	47.5	6.53	0.00529	8	0.000277	9.33	0.000314
Q53F19	Nuclear cap-binding protein subunit 3 OS=Homo sapiens OX=9606 GN=NCBP3 PE=1 SV=2	4	5.21589e+07	5.35535e+07	5.78896e+07	9.73126e+07	1.11076e+08	103166000	114627856	99267352	1.16667e+08	6.81628e+07	9.24567e+07	6.41196e+07	9.11233e+07	7.24887e+07	8.32494e+07	2.62989e+07	2.4043e+07	2.31946e+07	2.10622e+08	2.41575e+08	2.20874e+08	2.33386e+08	1.9026e+08	2.23924e+08	4.90915e+07	6.98059e+07	4.31141e+07	7.24547e+07	6.48713e+07	7.3358e+07	6.55	7.03	10.5	25.9	6.64	9.15	2.38e-06	8.81	4.21e-05	2.2	0.0269
Q53H82	Endoribonuclease LACTB2 OS=Homo sapiens OX=9606 GN=LACTB2 PE=1 SV=2	3	57685.9	54595.8	477179	119686	81895.1	98826.8	179580	119445	201360	150463	208097	264093	189379	209168	221332	33067.5	34365.8	49953.1	258970	188534	214597	365563	469793	386403	116982	157073	181312	153831	192980	195025	24	16.1	13.5	21.4	12.9	5.64	0.000729	10.4	0.000404	3.88	0.00181
Q5D862	Filaggrin-2 OS=Homo sapiens OX=9606 GN=FLG2 PE=1 SV=1	26	3.12063e+06	3.10804e+06	2.39657e+06	5.56462e+06	3.25285e+06	1.31032e+07	2.76721e+06	5.06527e+06	3.75278e+06	7.07233e+06	2.95364e+06	6.38591e+06	5.05412e+06	4.16102e+06	4.38592e+06	1.60227e+06	1.48298e+06	1.10659e+06	1.23378e+07	7.35564e+06	2.81814e+07	6.11889e+06	9.72004e+06	7.29093e+06	5.07244e+06	2.68971e+06	4.32835e+06	4.04637e+06	3.77237e+06	3.87249e+06	18.5	68.1	23.8	30.2	3.56	11.4	0.0211	5.52	0.000741	2.88	0.0154
Q5JVF3	PCI domain-containing protein 2 OS=Homo sapiens OX=9606 GN=PCID2 PE=1 SV=2	3	0	81741.8	0	0	80051.9	75685.7	0	35738.8	61215.5	116294	121519	338161	184498	177346	85007.7	27704.6	51968.6	9328.06	297676	181461	214517	73993.1	78915.6	144098	87251.9	145993	227300	169528	158667	141095	72.1	25.9	39.5	45.8	9.17	7.79	0.0375	3.34	0.0948	5.17	0.0497
Q5T8P6	RNA-binding protein 26 OS=Homo sapiens OX=9606 GN=RBM26 PE=1 SV=3	10	2.87655e+06	3.78292e+06	4.27315e+06	1.05481e+06	1.62998e+06	1.22844e+06	635741	863438	1.10886e+06	4.15945e+06	5.78495e+06	4.53027e+06	3.00306e+06	2.34478e+06	2.94547e+06	1.47346e+06	1.69554e+06	1.7851e+06	2.29668e+06	3.57106e+06	2.54744e+06	2.05566e+06	1.97878e+06	2.18189e+06	2.99543e+06	4.36653e+06	3.19823e+06	2.47674e+06	2.16977e+06	2.69816e+06	9.72	24.1	4.95	21	10.8	1.7	0.0447	1.25	0.0387	2.13	0.0112	Yes
Q5VT06	Centrosome-associated protein 350 OS=Homo sapiens OX=9606 GN=CEP350 PE=1 SV=1	2	459407	626934	1.10932e+06	49554.4	69718.3	65530.6	12056.4	48127.8	99767.3	810485	934111	1.06314e+06	490551	426232	341675	231637	280997	444469	116721	151618	163853	290434	92225.5	191450	583671	705074	714604	389641	381341	301065	34.9	17	51.8	10.9	13.7	-2.21	0.0385	-1.67	0.227	2.09	0.0455	Yes
Q5VZK9	F-actin-uncapping protein LRRC16A OS=Homo sapiens OX=9606 GN=CARMIL1 PE=1 SV=1	11	1.84346e+06	2.30329e+06	2.36617e+06	1.90095e+06	1.28428e+06	867198	663975	998037	1.06731e+06	6.88921e+06	3.71791e+06	5.41304e+06	2.31544e+06	1.65281e+06	1.70778e+06	929488	1.03235e+06	948051	3.90742e+06	2.91818e+06	1.92726e+06	1.64875e+06	2.0825e+06	2.09549e+06	4.98403e+06	2.83596e+06	3.64045e+06	1.91583e+06	1.68467e+06	1.50885e+06	5.65	33.9	13.1	28.4	12	3.01	0.0327	2	0.00614	3.94	0.0119
Q6EEV6	Small ubiquitin-related modifier 4 OS=Homo sapiens OX=9606 GN=SUMO4 PE=1 SV=2	3	9.62309e+06	1.00455e+07	1.21768e+07	4.89322e+06	4.70111e+06	3.48384e+06	4.3138e+06	4593309	3.8168e+06	1.6585e+07	1.6572e+07	1.98968e+07	9.68182e+06	9.0387e+06	9.72918e+06	4.90263e+06	4.50247e+06	4.87887e+06	1.06074e+07	1.02236e+07	7.49344e+06	8.82296e+06	8.80752e+06	7.3339e+06	1.19437e+07	1.25086e+07	1.3374e+07	7.83355e+06	8.08673e+06	8.57282e+06	4.71	18	10.3	5.71	4.6	1.98	0.0205	1.75	0.00492	2.65	2.82e-05	Yes
Q6NXE6	Armadillo repeat-containing protein 6 OS=Homo sapiens OX=9606 GN=ARMC6 PE=1 SV=2	2	366805	197498	236442	258472	394753	246287	136017	298969	129549	386803	424568	566965	48061.9	274252	344182	184946	88520.3	94735	559268	858480	527234	276884	572904	353270	278556	320467	381094	340930	245368	303274	44	28.2	38.3	15.8	16.2	5.28	0.00603	3.27	0.02	2.66	0.0351
Q6P4A8	Phospholipase B-like 1 OS=Homo sapiens OX=9606 GN=PLBD1 PE=1 SV=2	2	0	0	0	123588	0	122582	0	57482.4	104586	244465	479938	396449	184085	68222.7	50591.1	17634.8	20741.2	9208.39	267412	168325	304932	132559	115639	200697	314513	362261	266479	37045.4	78163.9	57947.7	37.6	28.6	30.1	15.2	35.6	15.6	0.00126	9.43	0.00272	19.8	0.00312
Q6SPF0	Atherin OS=Homo sapiens OX=9606 GN=SAMD1 PE=1 SV=1	1	89918.8	109572	117390	113588	99253.8	67322.2	66220.7	106327	101722	209307	245374	320733	129788	100488	90482.9	45337.8	49111.1	47034.7	245776	215850	144119	134803	203751	195200	150732	185210	215586	103090	89904.2	79728.6	4.01	25.9	21.1	17.7	12.9	4.28	0.0111	3.77	0.00829	3.9	0.00424
Q6VMQ6	Activating transcription factor 7-interacting protein 1 OS=Homo sapiens OX=9606 GN=ATF7IP PE=1 SV=3	1	12631.1	18847.4	13832.7	0	0	0	0	0	0	0	25191.8	17971.6	17035.9	12636.5	0	6368.72	8447.56	5542.33	25094	4752.83	13663.6	14398.2	12614.4	38491.8	14324.9	19014.9	12079.9	13531.5	11305.6	10468.8	22.1	70.3	66.2	23.4	13.5	2.14	0.365	3.22	0.0829	2.23	0.0117	Yes
Q71RC2	La-related protein 4 OS=Homo sapiens OX=9606 GN=LARP4 PE=1 SV=3	14	1.71991e+06	2.09239e+06	3.17802e+06	746670	402787	773586	567453	927051	791086	3.40286e+06	3.20877e+06	4.02008e+06	2.1006e+06	2.11628e+06	1.6602e+06	874156	975020	1.46093e+06	1.65237e+06	1.58503e+06	1.74009e+06	1.37452e+06	1.85917e+06	1.5579e+06	2.46461e+06	2.42521e+06	2.62179e+06	1.81973e+06	1.89909e+06	1.75899e+06	28.4	4.69	15.3	4.15	3.85	1.5	0.105	1.45	0.115	2.27	0.0302	Yes
Q7KZF4	Staphylococcal nuclease domain-containing protein 1 OS=Homo sapiens OX=9606 GN=SND1 PE=1 SV=1	38	2.08889e+07	1.55976e+07	2.01018e+07	1.67443e+07	9.70133e+06	1.42947e+07	1.53833e+07	9.8415e+06	1.6422e+07	3.27352e+07	2.51761e+07	2.69167e+07	1.82213e+07	1.64719e+07	1.73442e+07	1.05365e+07	6.90965e+06	8.21531e+06	3.63061e+07	2.01215e+07	3.09605e+07	3.1566e+07	2.05067e+07	3.17491e+07	2.35785e+07	1.9272e+07	1.81365e+07	1.44652e+07	1.48105e+07	1.53595e+07	21.5	28.3	23	14.1	3.03	3.41	0.00681	3.27	0.00372	2.38	0.0063
Q7KZI7	Serine/threonine-protein kinase MARK2 OS=Homo sapiens OX=9606 GN=MARK2 PE=1 SV=2	7	545274	283160	310595	394224	216396	310260	374371	750858	404242	917395	1.27236e+06	942450	545773	529573	554448	276519	213567	177367	740316	556890	807173	800895	1.03432e+06	872559	714651	960390	712763	458750	539582	548405	22.6	18.5	13.2	17.9	9.58	3.15	0.00268	4.06	0.00186	3.58	0.00181
Q7L2E3	ATP-dependent RNA helicase DHX30 OS=Homo sapiens OX=9606 GN=DHX30 PE=1 SV=1	3	0	0	0	98061	178822	135603	0	112778	158881	205737	364783	347039	97116.5	171283	103489	19450.4	9280.08	31003.5	238525	393420	301114	465745	219936	314097	204862	275341	233268	155037	153243	165735	54.6	25.1	37.2	14.9	4.27	15.6	0.00739	16.7	0.00424	11.9	0.0139
Q86SE5	RNA-binding Raly-like protein OS=Homo sapiens OX=9606 GN=RALYL PE=1 SV=2	2	448588	601080	551634	214238	259725	266305	219884	228579	237084	793890	1.10781e+06	1087836	438237	487652	425201	235514	271717	227783	469303	582042	597210	450066	450108	487078	571720	836183	802724	373951	436292	374664	9.57	12.7	4.62	19.5	9.06	2.24	0.00158	1.89	0.00209	3.01	0.00495
Q86TJ2	Transcriptional adapter 2-beta OS=Homo sapiens OX=9606 GN=TADA2B PE=1 SV=2	1	183566	363000	183222	310338	139888	562039	443780	589315	122529	452248	0	467107	210402	229278	213889	92555.2	162699	73411.6	671493	304218	1.20317e+06	903385	1.12928e+06	235129	325687	378342	313973	167120	205130	188467	42.9	62.2	61.5	10.1	10.2	6.63	0.026	6.9	0.0486	3.1	0.0317
Q86WR7	Proline and serine-rich protein 2 OS=Homo sapiens OX=9606 GN=PROSER2 PE=1 SV=2	1	72513.8	81992.5	126439	23849.7	35551.9	35701.9	25002	20939.2	45908.3	113447	121556	117281	61748.8	61362.1	76720.3	36562	36749.7	50660.4	51604.5	77315.8	76428.1	50895.6	40124.9	88096.4	81699.2	91751.6	78832.5	49046.6	54899.4	67601.7	19.6	21.3	42.2	8.07	16.6	1.66	0.0455	1.44	0.301	2.04	0.0117	Yes
Q86XA9	HEAT repeat-containing protein 5A OS=Homo sapiens OX=9606 GN=HEATR5A PE=1 SV=2	8	973197	1.57203e+06	1.47205e+06	9.26343e+06	9.74049e+06	7.79987e+06	7.60016e+06	8087195	7.98226e+06	2.78189e+07	2.77809e+07	3.68311e+07	1.20465e+07	1.21293e+07	1.49502e+07	533272	704596	679887	2.00857e+07	2.12381e+07	1.69613e+07	1.55636e+07	1.56237e+07	1.53671e+07	2.00937e+07	2.10077e+07	2.46407e+07	9.58774e+06	1.0892e+07	1.31862e+07	14.5	11.4	0.865	11	16.2	30.4	1.15e-05	24.3	0.000723	34.3	1.33e-05
Q8IU81	Interferon regulatory factor 2-binding protein 1 OS=Homo sapiens OX=9606 GN=IRF2BP1 PE=1 SV=1	3	86757.2	144783	62583.9	84765.8	73048	75914.7	72032	65638.4	87541.8	300075	448742	386055	170505	114192	228284	54739.8	64893.1	60986.3	185644	176268	201081	157297	128442	178667	216099	338714	259493	204592	241227	201152	8.51	6.68	16.3	22.9	10.3	3.12	8.53e-05	2.57	0.00324	4.51	0.00339
Q8IUC4	Rhophilin-2 OS=Homo sapiens OX=9606 GN=RHPN2 PE=1 SV=1	8	824288	806505	897340	88104	89497.1	0	246492	79260.1	533288	1.70426e+06	1.98974e+06	2.05552e+06	1.06802e+06	605702	645230	423700	390234	388418	286507	285185	99051.3	528750	606756	641159	1.23694e+06	1.57123e+06	1.38165e+06	857153	654682	635775	4.96	48.2	9.73	12	17.1	-1.79	0.189	1.48	0.00972	3.48	0.000932	Yes
Q8IUR0	Trafficking protein particle complex subunit 5 OS=Homo sapiens OX=9606 GN=TRAPPC5 PE=1 SV=1	3	667653	665970	827514	264669	431529	290733	82007.8	67061.6	114663	801051	861195	1.04611e+06	179253	536927	565911	336636	298493	331559	575113	942842	642333	204918	163142	225551	576877	650037	703157	593662	503743	498650	6.43	27.2	16.1	9.86	10	2.23	0.0286	-1.63	0.0236	2	0.00113
Q8IWI9	MAX gene-associated protein OS=Homo sapiens OX=9606 GN=MGA PE=1 SV=4	10	903834	811290	1.32352e+06	326217	397317	328922	224944	145394	407555	1.37405e+06	1.83633e+06	1.79655e+06	863428	1.06397e+06	904954	472671	421613	586206	738835	910273	1.01806e+06	557309	398350	816266	989520	1.38607e+06	1.20758e+06	685815	972378	870709	17.1	15.8	35.7	16.6	17.2	1.8	0.012	1.2	0.57	2.42	0.00301	Yes
Q8IWZ3	Ankyrin repeat and KH domain-containing protein 1 OS=Homo sapiens OX=9606 GN=ANKHD1 PE=1 SV=1	26	1.10205e+07	1.24003e+07	1.45933e+07	2.56959e+07	3.3268e+07	2.01582e+07	2.50093e+07	2.367e+07	2.83442e+07	1.65424e+07	2.4908e+07	1.77416e+07	2.13111e+07	1.96184e+07	2.14832e+07	5.68336e+06	5.57095e+06	6.05419e+06	5.56411e+07	7.24139e+07	4.31207e+07	5.16034e+07	4.50842e+07	5.44748e+07	1.1913e+07	1.94381e+07	1.19253e+07	1.69393e+07	1.75596e+07	1.85577e+07	4.38	25.8	9.55	30.1	4.62	9.89	0.00353	8.73	9.52e-05	2.5	0.0296
Q8IX01	SURP and G-patch domain-containing protein 2 OS=Homo sapiens OX=9606 GN=SUGP2 PE=1 SV=2	17	2.95712e+07	4.53245e+07	2.78415e+07	3.8827e+07	3.70021e+07	8.93705e+07	4.26344e+07	4.80158e+07	4.18262e+07	6.39023e+07	3.80065e+07	4.73693e+07	3.3244e+07	4.75855e+07	4.92961e+07	1.491e+07	2.03148e+07	1.11552e+07	8.3909e+07	8.06444e+07	1.91518e+08	8.69599e+07	9.21958e+07	8.05008e+07	4.68404e+07	2.89414e+07	3.18527e+07	2.65395e+07	4.24548e+07	4.3502e+07	29.8	53.2	6.77	26.8	25.3	7.68	0.00692	5.6	0.00725	2.32	0.0211
Q8IX18	Probable ATP-dependent RNA helicase DHX40 OS=Homo sapiens OX=9606 GN=DHX40 PE=1 SV=2	1	39289.3	56669.3	62681.7	9985.69	8651.55	0	26224.4	0	24985.9	99411.5	71959.7	127939	15044	16504	23098.4	19810	25399.6	25114.6	21606.5	18814.8	22776	53383.9	46919.8	47947.1	71591.2	54315.7	85996.1	11949.4	14765.7	20353.1	13.4	9.66	7.03	22.5	27.3	-1.11	0.361	2.11	0.00406	3.01	0.00439
Q8IXQ6	Protein mono-ADP-ribosyltransferase PARP9 OS=Homo sapiens OX=9606 GN=PARP9 PE=1 SV=2	5	297531	314017	269053	75958.2	26906.2	119264	137310	171964	279942	643516	366333	683620	237158	146303	213351	150017	155631	119440	173968	152897	318926	480341	484876	553993	463428	276511	459506	202237	173346	194634	13.7	42	8.15	26.7	7.88	1.52	0.238	3.57	0.000706	2.82	0.014
Q8IY22	C-Maf-inducing protein OS=Homo sapiens OX=9606 GN=CMIP PE=1 SV=3	3	100842	0	44209.9	0	19040.7	0	0	0	14447	180983	98171.5	181163	0	18909.1	110742	52639.1	30438.8	38924.8	19537.8	63158	72535.2	22327.6	43199	74256.8	130335	120948	121772	30455.9	23554.1	97579.7	27.5	54.7	56.1	4.18	80.9	1.27	0.807	1.15	0.912	3.06	0.0169	Yes
Q8IY67	Ribonucleoprotein PTB-binding 1 OS=Homo sapiens OX=9606 GN=RAVER1 PE=1 SV=1	4	319485	365827	288565	81114.9	21086.6	158668	89603	101588	109781	515848	338657	468051	205550	198890	189160	162001	165050	121391	208935	230031	339665	207947	229661	227708	371488	298407	314608	236128	177943	234655	16.3	27	5.42	11.7	15.3	1.74	0.047	1.48	0.0451	2.2	0.00435	Yes
Q8N4X5	Actin filament-associated protein 1-like 2 OS=Homo sapiens OX=9606 GN=AFAP1L2 PE=1 SV=1	9	2.69191e+06	2.70177e+06	2.78147e+06	2.00687e+06	1.58397e+06	1.71523e+06	1.72608e+06	2.04997e+06	1.79967e+06	6.32978e+06	5.55232e+06	7.28121e+06	3.9719e+06	3.45596e+06	3.60014e+06	1.35728e+06	1.21095e+06	1.11445e+06	4.47108e+06	3.73308e+06	3.77343e+06	3.60457e+06	4.05077e+06	3.61936e+06	4.57185e+06	4.22278e+06	4.8905e+06	3.15485e+06	3.17427e+06	3.17224e+06	9.96	10.4	6.74	7.32	0.337	3.25	0.000134	3.06	0.000203	3.72	9.01e-05
Q8N7X1	RNA-binding motif protein, X-linked-like-3 OS=Homo sapiens OX=9606 GN=RBMXL3 PE=2 SV=2	2	756200	553699	547268	215963	323891	268536	591721	359869	901716	825596	847431	1.23598e+06	609490	619457	363742	381282	248172	219274	479556	743453	581678	1.2168e+06	715042	1.73306e+06	597116	643648	833104	484113	556208	324568	30.5	22.1	41.7	18.1	26.1	2.13	0.0246	4.32	0.0138	2.44	0.0152
Q8N9M1	Uncharacterized protein C19orf47 OS=Homo sapiens OX=9606 GN=C19orf47 PE=1 SV=1	1	0	0	0	0	0	52894.4	63449.4	0	0	65073	79901.4	78794.5	48369.6	52199.8	0	4169.72	8430.69	2240.04	6795.32	5204.29	113233	129161	3765.85	8206.13	46862.3	60310.1	52962.9	38419.7	46702.1	44839.7	64	148	151	12.6	10	8.44	0.316	9.51	0.348	10.8	0.0194	Yes
Q8NCA5	Protein FAM98A OS=Homo sapiens OX=9606 GN=FAM98A PE=1 SV=2	2	554922	680811	744593	302967	356252	377568	297921	224934	516804	956729	761765	1.07606e+06	453205	504282	659565	279796	305145	298335	655543	774751	808272	606465	666326	991730	688989	733740	723292	539744	451170	581172	4.46	10.8	27.5	3.27	12.7	2.53	0.00166	2.56	0.0232	2.43	2.18e-05
Q8ND24	RING finger protein 214 OS=Homo sapiens OX=9606 GN=RNF214 PE=1 SV=2	2	190352	223953	160893	0	0	0	0	0	0	360005	383705	373777	260614	123986	166361	95976.9	100377	64464.8	7442.03	15648.6	22389.7	68839.2	8973.91	50771.2	259258	311765	251240	207004	120948	146588	22.5	49.4	71.6	12	27.9	-5.73	0.0178	-2.03	0.254	3.15	0.00582	Yes
Q8ND56	Protein LSM14 homolog A OS=Homo sapiens OX=9606 GN=LSM14A PE=1 SV=3	3	686757	544456	626494	256427	261596	195052	272450	332282	348836	934360	821242	988053	675675	561309	562969	364263	244030	251017	560470	580056	419903	591050	636740	679541	672880	619879	664135	536684	502191	496058	23.6	16.8	6.96	4.36	4.28	1.82	0.0235	2.22	0.0172	2.28	0.0196
Q8NEY8	Periphilin-1 OS=Homo sapiens OX=9606 GN=PPHLN1 PE=1 SV=2	3	467000	474374	486638	149145	18224.1	124863	13876.4	22476	8518.4	607620	551557	751509	406046	278179	408191	235465	212618	194981	322712	180877	279879	50295.2	48605.3	22076.6	437577	416320	505138	326500	251303	369425	9.47	27.9	39.2	10.2	18.9	1.22	0.432	-5.32	0.0198	2.11	0.000727	Yes
Q8TB61	Adenosine 3'-phospho 5'-phosphosulfate transporter 1 OS=Homo sapiens OX=9606 GN=SLC35B2 PE=1 SV=1	1	60339.9	74657.9	20054.5	123989	71921.5	45491.6	135662	125665	119155	215349	222545	159650	108968	130769	139423	30423.9	33462.3	8035.2	268280	156410	97385.2	276161	240807	228655	155084	167978	107311	86552.5	116996	122852	57.9	49.9	9.93	22.3	17.9	7.26	0.0259	10.4	0.0305	5.98	0.0423
Q8TBZ5	Zinc finger protein 502 OS=Homo sapiens OX=9606 GN=ZNF502 PE=1 SV=1	1	715490	703380	891871	1.54079e+06	1.67387e+06	1.83663e+06	1.85142e+06	1.64416e+06	1.82062e+06	1.00575e+06	1.39892e+06	1.18912e+06	1.20558e+06	1.28456e+06	1.28882e+06	360756	315261	357345	3.33389e+06	3.6402e+06	3.93173e+06	3.76887e+06	3.15065e+06	3.49371e+06	724294	1.05592e+06	799287	957585	1.14927e+06	1.13564e+06	7.36	8.22	8.92	20.2	9.9	10.6	3.65e-06	10.1	5.93e-06	2.5	0.00818
Q8TCX5	Rhophilin-1 OS=Homo sapiens OX=9606 GN=RHPN1 PE=1 SV=2	1	153842	207148	172145	0	0	0	51324.4	79260.1	60269.3	222324	381963	400472	187809	82161.4	22046.8	77568.2	92845.3	68973.2	1831.63	7762.95	39727.8	104479	151883	115655	160107	288309	269184	149176	73508	19426.5	15.2	124	20	28.9	80.8	-4.85	0.125	1.55	0.0399	3	0.0157	Yes
Q8TDB6	E3 ubiquitin-protein ligase DTX3L OS=Homo sapiens OX=9606 GN=DTX3L PE=1 SV=1	6	367039	337799	285355	91713.2	204986	195205	193460	309970	312636	715470	722623	745799	430842	470561	417803	188934	185470	208867	305825	516680	455855	607250	599401	599938	515246	545441	501300	471714	421001	368145	6.5	25.5	0.728	4.33	12.3	2.19	0.0347	3.1	0.000932	2.68	6.82e-05
Q8WUF5	RelA-associated inhibitor OS=Homo sapiens OX=9606 GN=PPP1R13L PE=1 SV=4	6	556162	404116	220292	121090	108338	128462	118078	160912	118486	658837	955186	209953	321593	295627	331905	310978	186057	323659	453330	301869	381315	103810	373380	94726	492925	736457	440663	314711	272823	418471	27.8	20	83	28.4	22.4	1.38	0.196	-1.43	0.348	2.03	0.0401	Yes
Q8WWK9	Cytoskeleton-associated protein 2 OS=Homo sapiens OX=9606 GN=CKAP2 PE=1 SV=1	2	155434	103102	56185.6	118055	140965	0	89438.9	77998.7	102139	171315	232561	126786	90316.7	28585.2	125354	78371	46211.1	54099.7	255442	306561	297459	182067	149466	196002	123373	175539	124836	71737.9	71092.6	110455	28.1	9.52	13.6	21	26.7	4.81	0.00486	2.95	0.00829	2.37	0.0131
Q92522	Histone H1x OS=Homo sapiens OX=9606 GN=H1FX PE=1 SV=1	2	64603.6	105687	96378.4	197696	226789	168961	326722	222618	354318	267030	384891	195041	279226	187821	160489	63117.3	55353	53447.4	427764	493204	361700	665096	426594	679925	192301	290518	131100	221787	168039	141414	8.94	15.4	24.1	39.3	23.1	7.46	0.000214	10.3	0.00201	3.57	0.0288
Q92576	PHD finger protein 3 OS=Homo sapiens OX=9606 GN=PHF3 PE=1 SV=3	3	54462.9	267509	331480	103011	123127	118108	65770.3	54954.3	85825.9	297691	396268	365740	191482	227358	219020	125592	119900	132814	226720	270918	255489	145487	187390	171059	214382	299106	245838	152093	203412	192988	5.13	8.94	12.6	16.9	14.8	1.99	0.00114	1.33	0.0474	2.01	0.0132	Yes
Q92615	La-related protein 4B OS=Homo sapiens OX=9606 GN=LARP4B PE=1 SV=3	11	2.34558e+07	4.98005e+07	2.45528e+07	4.58138e+07	4.68636e+07	4.88742e+07	4.20715e+07	6.98548e+07	4.59415e+07	4.06492e+07	5.71206e+07	4.56824e+07	5.76323e+07	4.53124e+07	4.70571e+07	1.1862e+07	2.23258e+07	9.86404e+06	9.89661e+07	1.01932e+08	1.04686e+08	8.58887e+07	1.33947e+08	8.81983e+07	2.92736e+07	4.3115e+07	3.07061e+07	4.58483e+07	4.05435e+07	4.14641e+07	45.6	2.81	26.4	22.1	6.65	6.94	0.0146	6.99	0.00487	2.34	0.049
Q92769	Histone deacetylase 2 OS=Homo sapiens OX=9606 GN=HDAC2 PE=1 SV=2	7	3.21959e+06	4.50172e+06	4.51186e+06	3.943e+07	3.93145e+07	3.38186e+07	2.90592e+07	3.54471e+07	4.21819e+07	1.50671e+08	1.56483e+08	1.87664e+08	6.54067e+07	6.61974e+07	6.45668e+07	1.62334e+06	2.01771e+06	1.80776e+06	8.48555e+07	8.55424e+07	7.24523e+07	5.91774e+07	6.79516e+07	8.09824e+07	1.08506e+08	1.18115e+08	1.26141e+08	5.19521e+07	5.92253e+07	5.68927e+07	10.9	9.1	15.8	7.51	6.63	44.6	1.72e-06	38.2	1.49e-05	64.7	2.44e-06
Q92817	Envoplakin OS=Homo sapiens OX=9606 GN=EVPL PE=1 SV=3	9	1.32705e+06	1.25292e+06	1.48107e+06	1.33584e+06	1.44356e+06	1.3663e+06	799680	826890	1.58276e+06	1.72096e+06	2.21649e+06	1.66407e+06	1.34535e+06	1.02428e+06	1.49334e+06	615574	624216	610340	3.00751e+06	3.19726e+06	3.0559e+06	1.69583e+06	1.64686e+06	3.11797e+06	1.26242e+06	1.7496e+06	1.1318e+06	1.09167e+06	1.00386e+06	1.3195e+06	1.14	3.19	38.8	23.6	14.3	5.01	2.28e-05	3.49	0.0284	2.24	0.0262
Q92974	Rho guanine nucleotide exchange factor 2 OS=Homo sapiens OX=9606 GN=ARHGEF2 PE=1 SV=4	3	154269	42654.6	55668.9	23879.3	24160.3	32901.9	28417.6	35335.7	50525.5	257473	200111	323570	83584.4	49161.2	69519.7	84754.8	28270.3	38601.2	71796.8	67940.7	87639.8	68826.2	91611.5	116916	185420	228856	217492	82515.7	51156.7	70758.8	59.5	13.8	26	10.7	23.2	1.5	0.256	1.83	0.156	4.17	0.0382	Yes
Q92989	Polyribonucleotide 5'-hydroxyl-kinase Clp1 OS=Homo sapiens OX=9606 GN=CLP1 PE=1 SV=1	1	83887.6	91075.1	85659.7	0	62676.7	61198.8	58462.1	81177.1	63737.3	146617	134098	154351	133474	74030.2	87232.2	42296.8	40820.6	34321.2	200381	136305	131010	119009	155557	122310	105586	101218	103749	106018	66233.2	76864.2	10.8	24.8	15.3	2.12	24.8	3.98	0.00336	3.38	0.000497	2.64	0.00336
Q93099	Homogentisate 1,2-dioxygenase OS=Homo sapiens OX=9606 GN=HGD PE=1 SV=2	4	424858	584093	419865	107046	82573.8	259935	315024	155750	141702	669998	305628	606111	367550	241868	217351	214217	261795	168227	280000	197737	259011	315430	309675	349868	482499	412208	407407	291942	232501	206536	21.8	17.4	6.69	9.69	18	1.14	0.449	1.51	0.0682	2.02	0.0182	Yes
Q96BD5	PHD finger protein 21A OS=Homo sapiens OX=9606 GN=PHF21A PE=1 SV=1	4	71311.7	153941	76233.5	270039	132496	144195	133009	39712.2	254392	867381	880519	340486	310963	69034.8	227045	68078.2	83603.7	41143.8	586175	301871	475206	276957	412020	491135	658455	664622	273934	261363	165652	218639	33.4	31.5	27.5	42	22.3	7.07	0.00246	6.12	0.00294	8.28	0.00609
Q96DF8	Splicing factor ESS-2 homolog OS=Homo sapiens OX=9606 GN=ESS2 PE=1 SV=1	1	0	0	19511	0	0	33147.9	0	35408.2	0	62538.2	0	43216.5	0	17288	15899.1	12785.4	14785.6	7817.46	6748.79	3604.98	70960.6	3282.05	67851.4	19387.6	45036.9	37729.5	29048.6	20945.8	15467.2	14009.4	30.4	140	111	21.5	21.8	2.3	0.96	2.56	0.727	3.16	0.0104	Yes
Q96DV4	39S ribosomal protein L38, mitochondrial OS=Homo sapiens OX=9606 GN=MRPL38 PE=1 SV=2	2	54748.4	0	117328	182661	178110	20791	118350	133101	42819.1	0	133215	115589	86317.3	15909.1	18536.4	29949	40788.1	52120.9	426395	387340	569671	240920	255056	326048	84044	113128	77694.9	68561.2	30933.6	38795.8	27.1	20.8	16.6	20.6	43.1	11.3	0.000425	6.69	0.00143	2.24	0.0175
Q96EE3	Nucleoporin SEH1 OS=Homo sapiens OX=9606 GN=SEH1L PE=1 SV=3	2	175667	43277.5	59117.3	0	60242.5	0	97920.9	124760	54557.7	183432	167519	221167	0	110473	128226	88572.9	53651.8	50882.4	8588.18	133461	30882.3	210256	253202	120992	132099	168533	148661	46041.6	98838	124300	32.6	116	34.6	12.2	44.5	-1.12	0.506	3.03	0.0199	2.33	0.026
Q96EP5	DAZ-associated protein 1 OS=Homo sapiens OX=9606 GN=DAZAP1 PE=1 SV=1	2	1.82674e+06	1.38057e+06	3.45141e+06	853313	629893	519149	691795	897031	706604	2.71634e+06	2.84695e+06	4185228	1.94064e+06	1.6406e+06	1.7846e+06	923200	619476	1.38482e+06	1.84635e+06	1.36985e+06	1.11136e+06	1.40826e+06	1.71895e+06	1.42423e+06	1.95617e+06	2.1489e+06	2.8528e+06	1.54143e+06	1.46781e+06	1.57249e+06	39.5	25.8	11.5	20.4	3.52	1.48	0.212	1.55	0.162	2.38	0.0414	Yes
Q96FW1	Ubiquitin thioesterase OTUB1 OS=Homo sapiens OX=9606 GN=OTUB1 PE=1 SV=2	1	208558	180695	178453	115464	183939	170535	243438	291863	199206	258069	247218	222329	155669	244670	222926	105157	80989.1	71500.8	249835	400017	365069	495557	559287	382269	185849	186602	149442	123647	218901	196430	20.2	23.2	18.7	12.2	27.7	3.94	0.00215	5.58	0.000423	2.03	0.00946
Q96I24	Far upstream element-binding protein 3 OS=Homo sapiens OX=9606 GN=FUBP3 PE=1 SV=2	20	6.68092e+06	9.35116e+06	8.85705e+06	2.62098e+06	2.30554e+06	2.07161e+06	3.66255e+06	2.34527e+06	4.70834e+06	1.2153e+07	1.33934e+07	9.91708e+06	6.55243e+06	7.03842e+06	6.50436e+06	3.3733e+06	4.19549e+06	3.72927e+06	5.06813e+06	5.03186e+06	4.037e+06	7.95448e+06	6.88751e+06	7.5547e+06	8.7677e+06	1.0144e+07	6.67397e+06	5.2188e+06	6.12219e+06	5.75289e+06	10.9	12.4	7.22	20.5	7.97	1.25	0.0867	1.98	0.00152	2.26	0.0101	Yes
Q96J01	THO complex subunit 3 OS=Homo sapiens OX=9606 GN=THOC3 PE=1 SV=1	2	33063.3	82496.9	54746.1	119388	186375	43314.8	121958	147441	161269	297837	281641	519819	93145.7	169052	140713	25623.2	41748.7	22958.1	258325	405315	432337	248265	282535	309470	214487	212585	349404	139651	151247	123988	33.8	25.6	11	30.3	9.89	12.1	0.000557	9.3	0.00319	8.6	0.000991
Q96P11	Probable 28S rRNA (cytosine-C(5))-methyltransferase OS=Homo sapiens OX=9606 GN=NSUN5 PE=1 SV=2	1	0	0	0	0	0	0	33736.9	0	18588.4	50419.7	53134.2	64505.7	0	11035.2	13284.3	6644.08	3527.31	8148.33	6202.43	13541.5	36807.3	68676.8	61317.2	35670.6	36309.8	40106	43358.5	9494.87	9872.91	11705.4	38.6	84.8	31.4	8.84	11.4	3.09	0.207	9.04	0.00277	6.54	0.0137
Q96P63	Serpin B12 OS=Homo sapiens OX=9606 GN=SERPINB12 PE=1 SV=1	10	3.56909e+06	4.83708e+06	2.89719e+06	4.12949e+06	2.94666e+06	5.00159e+06	3.23455e+06	4.49285e+06	3.14631e+06	6.07046e+06	3.79893e+06	5.83417e+06	4.02089e+06	3.48351e+06	3.73703e+06	1.69104e+06	2.00238e+06	1.46499e+06	8.45139e+06	6.79119e+06	1.07158e+07	6.60208e+06	8.64388e+06	6.04197e+06	4.37164e+06	3.50842e+06	3.92153e+06	3.21466e+06	3.24775e+06	3.3058e+06	15.7	22.8	19.3	11	1.42	5.03	0.000995	4.13	0.000638	2.29	0.00253
Q96PK6	RNA-binding protein 14 OS=Homo sapiens OX=9606 GN=RBM14 PE=1 SV=2	28	6.93633e+06	6.52661e+06	8.68268e+06	1.62058e+07	1.81986e+07	1.56071e+07	1.51966e+07	1.60537e+07	1.84959e+07	3.68514e+07	3.75195e+07	4.47161e+07	1.86268e+07	1.74975e+07	1.92087e+07	3.50238e+06	3.26928e+06	3.76658e+06	3.52088e+07	3.98716e+07	3.34335e+07	3.095e+07	3.07651e+07	3.55076e+07	2.65445e+07	2.83274e+07	2.93537e+07	1.50046e+07	1.56629e+07	1.6938e+07	7.08	9.19	8.29	5.06	6.19	10.3	6.77e-06	9.23	4.37e-06	7.99	5.45e-06
Q96PU4	E3 ubiquitin-protein ligase UHRF2 OS=Homo sapiens OX=9606 GN=UHRF2 PE=1 SV=1	2	30255.7	0	0	40874.9	35703.4	39966.9	36958.1	31394.9	36502.2	103378	345391	78341.9	52840.3	111307	153281	16062.5	3747.38	9440.12	100660	86484.1	87684.3	103249	63731.6	76268.4	91348.4	104496	58861.3	106905	99583.7	135063	63.2	8.58	24.9	27.7	16.5	9.4	0.0286	8.32	0.0244	8.71	0.0206
Q96S97	Myeloid-associated differentiation marker OS=Homo sapiens OX=9606 GN=MYADM PE=1 SV=2	3	1.21918e+06	1.47252e+06	1.87986e+06	1.30712e+06	1.32499e+06	974661	1.83172e+06	1.34677e+06	1.43423e+06	2.41328e+06	2.74266e+06	2.18735e+06	1.91705e+06	1.77616e+06	1.80023e+06	614722	659996	753202	2.82826e+06	2.88149e+06	2.08648e+06	3.72875e+06	2.58077e+06	2.75225e+06	1.73792e+06	2.07018e+06	1.52789e+06	1.5227e+06	1.5891e+06	1.58626e+06	10.4	17.1	20.5	15.4	2.4	3.84	0.0012	4.47	0.00132	2.63	0.00147
Q96T37	RNA-binding protein 15 OS=Homo sapiens OX=9606 GN=RBM15 PE=1 SV=2	13	1.36848e+06	2.33436e+06	2.45532e+06	542313	561010	550691	503369	582188	661546	2.59877e+06	2.28682e+06	2.54124e+06	1.51878e+06	1.18644e+06	1.4207e+06	726025	1.06198e+06	1.03785e+06	1.27696e+06	1.27379e+06	1.3973e+06	1.0916e+06	1.01465e+06	1.3256e+06	1.87151e+06	2.1792e+06	1.70813e+06	1.21934e+06	1.10267e+06	1.17028e+06	19.9	5.35	14.2	12.5	5.03	1.4	0.0981	1.21	0.251	2.04	0.0126	Yes
Q99496	E3 ubiquitin-protein ligase RING2 OS=Homo sapiens OX=9606 GN=RNF2 PE=1 SV=1	1	0	0	0	55038.5	99758.5	60031.5	0	59810.3	33533.5	121644	174240	0	0	0	0	708.454	1618.57	1391.67	119089	216948	128511	142245	114612	64349.6	87602	131518	85900.4	4443.73	17030.2	14191.9	38.2	34.9	36.9	25.4	55.5	125	0.000178	86.4	0.000217	82	0.000502
Q99536	Synaptic vesicle membrane protein VAT-1 homolog OS=Homo sapiens OX=9606 GN=VAT1 PE=1 SV=2	5	428121	521698	503273	187585	208105	228702	215341	340689	267804	848869	817729	728632	252163	438544	276187	216596	265963	249306	878592	497211	636056	501875	439417	577655	611313	617228	489762	224350	397447	268622	10.3	28.8	13.7	12.6	30.3	2.75	0.0173	2.08	0.00239	2.35	0.00113
Q99615	DnaJ homolog subfamily C member 7 OS=Homo sapiens OX=9606 GN=DNAJC7 PE=1 SV=2	3	475956	124473	236308	137020	168710	112651	156325	78903.8	255923	529700	501880	598439	158802	211701	246710	122320	58845.1	97644	305450	414164	333535	338185	185202	498948	381464	378823	402250	181969	234946	217387	34.4	16.1	46	3.31	12.8	3.78	0.0137	3.67	0.0279	4.17	0.0203
Q99623	Prohibitin-2 OS=Homo sapiens OX=9606 GN=PHB2 PE=1 SV=2	11	2.20682e+06	2.93151e+06	2.88219e+06	2.92116e+06	4.0921e+06	2.23686e+06	3.23558e+06	3.05455e+06	3191770	3.97062e+06	3.46047e+06	4166693	2.67222e+06	2.41981e+06	2.79149e+06	1.1904e+06	1.36357e+06	1.25319e+06	6.6316e+06	8.89921e+06	4.7885e+06	6.58654e+06	5.85333e+06	6.1249e+06	2.85945e+06	2.61199e+06	2.88319e+06	2.19024e+06	2.30843e+06	2.52396e+06	6.91	30.4	5.99	5.39	7.23	5.34	0.00904	4.88	8.55e-06	2.19	0.000138
Q99661	Kinesin-like protein KIF2C OS=Homo sapiens OX=9606 GN=KIF2C PE=1 SV=2	3	23265.4	36166.7	47539.7	67343.7	54742.9	22764.9	33232.4	49000.5	44240.8	294161	382324	384968	78410.7	191159	44431.3	28234.9	19743.9	27295.8	155484	149963	127446	93366.1	107761	114063	211840	288581	258762	64613.8	171026	76134.6	18.6	10.3	10.1	15.3	56.2	5.75	0.000775	4.19	0.00149	10.1	0.000128
Q99798	Aconitate hydratase, mitochondrial OS=Homo sapiens OX=9606 GN=ACO2 PE=1 SV=2	4	142637	132752	184770	118189	140396	79018.8	98648.4	159604	288040	289446	180745	175380	81813.8	337540	105974	85621.7	99846.4	80285	432943	316687	281537	246040	312127	368048	212172	249882	168641	141279	301990	265536	11.4	23.1	19.8	19.3	35.7	3.88	0.00277	3.49	0.00226	2.37	0.00618
Q99959	Plakophilin-2 OS=Homo sapiens OX=9606 GN=PKP2 PE=1 SV=2	5	95980.7	322161	103322	90461.1	120061	103461	59106.3	113234	114149	486047	535289	680933	184364	182588	174263	84429.1	147267	61553.6	246031	271581	309051	272306	233454	223733	350027	404040	457700	168738	199809	160902	45.4	11.5	10.6	13.3	11.7	2.82	0.0425	2.49	0.0555	4.13	0.021
Q9BQ04	RNA-binding protein 4B OS=Homo sapiens OX=9606 GN=RBM4B PE=1 SV=1	12	5.87604e+06	6.0347e+06	7.71359e+06	2.06989e+06	2.21608e+06	1.88725e+06	1.6825e+06	2.2352e+06	2.24524e+06	7.8443e+06	8.15392e+06	1.00516e+07	5.73126e+06	4.31302e+06	5.2345e+06	3.12895e+06	2.71454e+06	3.0906e+06	4.53774e+06	4.8901e+06	4.18247e+06	3.52386e+06	4.31844e+06	4.02171e+06	5.64907e+06	6.21112e+06	6.75631e+06	4.55229e+06	3.85876e+06	5.11515e+06	7.69	7.8	10.2	8.92	14	1.52	0.00277	1.33	0.0222	2.08	0.000478	Yes
Q9BRL6	Serine/arginine-rich splicing factor 8 OS=Homo sapiens OX=9606 GN=SRSF8 PE=1 SV=1	1	195091	178996	301681	205231	343410	228358	224969	269130	189136	0	378332	277475	204660	210949	141822	98366.6	80227.5	120874	444067	746824	488853	457961	515723	362946	318491	285568	186509	162560	188732	124966	20.4	29.2	17.3	26.1	20.2	5.61	0.00143	4.46	0.000733	2.64	0.0112
Q9BSD7	Cancer-related nucleoside-triphosphatase OS=Homo sapiens OX=9606 GN=NTPCR PE=1 SV=1	3	89489.6	124150	115259	135840	161018	0	42091.1	95005.5	28314.1	229379	298008	436208	70676.3	111721	57535.4	45923.1	56932.2	60563.9	298326	370521	243989	112155	184893	58796.5	165188	224939	293204	79982.8	107988	61704.7	14	20.9	53.4	28.1	28	5.59	0.000575	2.18	0.17	4.18	0.00497
Q9BSJ2	Gamma-tubulin complex component 2 OS=Homo sapiens OX=9606 GN=TUBGCP2 PE=1 SV=2	4	246762	315004	357172	45068.7	31287	38764	128465	102101	96400.1	331140	481892	429727	254615	219262	38761.6	124419	141187	143108	102944	97084.9	92898.1	286884	200545	187837	238471	363736	288847	228438	200622	198277	7.55	5.17	23.9	21.2	8.02	-1.4	0.00537	1.65	0.0539	2.18	0.0155	Yes
Q9BT25	HAUS augmin-like complex subunit 8 OS=Homo sapiens OX=9606 GN=HAUS8 PE=1 SV=3	3	173509	265169	194553	199270	0	71316.9	62801.6	158824	42963.9	329485	310217	533091	297355	120399	161160	87484.5	119645	84124.7	476656	265123	178085	154247	313467	98710.5	237279	252853	358325	237933	220712	144489	20.2	50.1	59	23.3	24.7	3.16	0.0488	1.94	0.231	2.91	0.00351
Q9BTD8	RNA-binding protein 42 OS=Homo sapiens OX=9606 GN=RBM42 PE=1 SV=1	3	0	220228	0	232163	229571	173254	223200	176414	204885	651256	895038	1.02813e+06	416826	248330	277329	30105.9	4131.36	10247.8	529635	512160	380520	461150	370150	399971	469002	675581	691074	350559	227465	247317	91.6	17.2	11.3	20.3	24	32	0.0196	27.7	0.023	41.3	0.0162
Q9BUT9	MAPK regulated corepressor interacting protein 2 OS=Homo sapiens OX=9606 GN=MCRIP2 PE=1 SV=2	1	44101.6	39246	52737.5	42680.2	45327.2	53081.7	37031.1	25113.6	41712.2	71840.9	133615	91842	51840.7	57431.9	61207.9	22236.4	17590.4	21130.3	92349	98574.4	113633	75382.8	48124.3	80044.2	51736.2	100853	61733	41176.7	51383.1	53933	11.9	10.8	25.4	36.3	13.8	5	7.92e-05	3.34	0.00861	3.52	0.0168
Q9BVG8	Kinesin-like protein KIFC3 OS=Homo sapiens OX=9606 GN=KIFC3 PE=1 SV=4	9	1.069e+06	1.30776e+06	1.19782e+06	620833	587578	628788	662091	359821	645704	2.71447e+06	2.52435e+06	2.26464e+06	1.32567e+06	1424799	1.17273e+06	542584	603857	559427	1.38542e+06	1.29263e+06	1.36741e+06	1.34779e+06	1.14871e+06	1.23908e+06	1.95483e+06	1.96049e+06	1.52221e+06	1.05297e+06	1.27474e+06	1.15533e+06	5.57	3.65	8.01	13.9	9.56	2.37	6.59e-05	2.19	0.000314	3.19	0.00214
Q9BWF3	RNA-binding protein 4 OS=Homo sapiens OX=9606 GN=RBM4 PE=1 SV=1	15	8.38288e+06	8.09283e+06	1.01181e+07	3.31408e+06	3.54562e+06	2.79201e+06	2.76498e+06	3.16809e+06	3.44203e+06	1.14492e+07	1.1946e+07	1.42106e+07	7.84832e+06	6.14106e+06	7.26855e+06	4.69781e+06	3.62727e+06	4.05401e+06	7.1998e+06	7.76865e+06	6.07382e+06	5.6757e+06	6.11424e+06	6.37143e+06	8.24516e+06	9.01694e+06	9.55187e+06	6.23386e+06	5.49427e+06	6.73329e+06	13.1	12.3	5.81	7.35	10.1	1.7	0.00707	1.47	0.0213	2.17	0.00229	Yes
Q9BY77	Polymerase delta-interacting protein 3 OS=Homo sapiens OX=9606 GN=POLDIP3 PE=1 SV=2	10	921000	1.35701e+06	1.40921e+06	1.04058e+06	1.21298e+06	1.21809e+06	909751	874069	827895	2.55433e+06	3.25648e+06	2.635e+06	1.47206e+06	1.73679e+06	1.59378e+06	534856	621500	622729	2.26345e+06	2.70156e+06	2.63847e+06	1.87817e+06	1.532e+06	1.61621e+06	2.02093e+06	2.46075e+06	1.88235e+06	1.4617e+06	1.55617e+06	1.41795e+06	8.5	9.34	10.8	14.2	4.78	4.27	4.48e-05	2.83	0.000241	3.58	0.000485
Q9BYJ9	YTH domain-containing family protein 1 OS=Homo sapiens OX=9606 GN=YTHDF1 PE=1 SV=1	9	2.46883e+06	2.02966e+06	3.63805e+06	1.04702e+06	1.19852e+06	823369	836059	1.06614e+06	1.2782e+06	3.22009e+06	2.7189e+06	3.97222e+06	2.03002e+06	1.83529e+06	1.99258e+06	1.25789e+06	1.14548e+06	1.45765e+06	2.26548e+06	2.63533e+06	2.47321e+06	1.70716e+06	2.06367e+06	2.16329e+06	2.31895e+06	2.73432e+06	2.66999e+06	1.69312e+06	1.642e+06	1.75576e+06	12.3	7.54	12.1	8.68	3.36	1.91	0.00284	1.54	0.0131	2	0.00189	Yes
Q9BYT8	Neurolysin, mitochondrial OS=Homo sapiens OX=9606 GN=NLN PE=1 SV=1	2	73527.4	89518.5	119534	250465	297703	212878	267864	318602	289969	222677	347709	389786	0	90460.2	310517	77396.6	44019.4	55470.8	541942	647423	455714	545280	610526	556441	160361	262453	262000	111811	96591.9	103437	28.8	17.5	6.11	25.8	7.33	9.3	0.000808	9.68	0.00372	3.87	0.00426
Q9BYW2	Histone-lysine N-methyltransferase SETD2 OS=Homo sapiens OX=9606 GN=SETD2 PE=1 SV=3	2	831188	1.20517e+06	761709	1.09904e+08	1.15029e+08	9.98341e+07	107185960	1.1769e+08	1.19183e+08	3.60399e+08	3.4869e+08	4.07434e+08	1.73951e+08	1.59404e+08	1.67121e+08	419092	540165	305193	2.37808e+08	2.50161e+08	2.13766e+08	2.18221e+08	2.25534e+08	2.28738e+08	2.59541e+08	2.63194e+08	2.73863e+08	1.38168e+08	1.42615e+08	1.47258e+08	27.9	7.91	2.4	2.8	3.19	555	0.000294	532	0.000634	630	0.000586
Q9BZE4	Nucleolar GTP-binding protein 1 OS=Homo sapiens OX=9606 GN=GTPBP4 PE=1 SV=3	6	1.04856e+06	1.15742e+06	1.22411e+06	734476	1.12833e+06	1.08579e+06	1.16666e+06	697921	1.03701e+06	1.84426e+06	1.70109e+06	1.81047e+06	1.34088e+06	1.08501e+06	1.37604e+06	532726	518766	502780	1.59883e+06	2.47689e+06	2.52864e+06	2.51148e+06	1.53346e+06	1.98999e+06	1.32814e+06	1.28399e+06	1.21694e+06	1.0677e+06	985275	1.21793e+06	2.89	23.7	24.3	4.39	10.8	4.25	0.0101	3.88	0.0104	2.46	2.8e-05
Q9BZL6	Serine/threonine-protein kinase D2 OS=Homo sapiens OX=9606 GN=PRKD2 PE=1 SV=3	2	98700.3	129149	107220	0	42225.4	0	74536.4	75785	78082	140049	177258	141313	80210.9	56869.5	22852.2	49765.5	57885.8	42959.7	19788.9	100717	58869.5	227341	145224	149837	100856	133796	94985.8	77189	59312.5	112671	14.9	67.7	26.5	19	32.7	1.19	0.974	3.47	0.00396	2.19	0.00522
Q9H009	Nascent polypeptide-associated complex subunit alpha-2 OS=Homo sapiens OX=9606 GN=NACA2 PE=1 SV=1	1	0	0	0	29440.3	0	0	0	0	0	25718.4	19235.6	17869.7	35519	0	24908.9	3526.24	1169.15	1031.19	63701.3	3321.31	29216	23352.8	13737.3	8577.5	18521.1	14519.1	12011.4	28212.5	31684.5	21948.4	73.5	94.4	49.3	21.9	18.1	16.8	0.0943	7.97	0.0136	7.87	0.0215
Q9H0E2	Toll-interacting protein OS=Homo sapiens OX=9606 GN=TOLLIP PE=1 SV=1	2	127747	0	39506.4	92790	148580	121641	124522	157964	192854	227684	143578	139769	187542	0	169549	19158.5	8935.34	25606.1	248817	323121	260401	253485	383564	370080	163967	112401	106213	156595	104242	149397	47	14.4	21.3	24.9	20.8	15.5	0.00873	18.8	0.00464	7.12	0.0124
Q9H0J9	Protein mono-ADP-ribosyltransferase PARP12 OS=Homo sapiens OX=9606 GN=PARP12 PE=1 SV=1	2	0	69155.9	0	95233.7	221848	81790.5	50149.9	70911.4	111525	389162	254351	358202	221558	132799	146516	5558.56	32143	10230.8	433721	482459	405368	107380	138491	235909	280255	191986	240771	175982	118812	129102	88.8	8.85	41.8	18.6	21.6	27.6	0.0192	10.1	0.0245	14.9	0.0248
Q9H1B7	Probable E3 ubiquitin-protein ligase IRF2BPL OS=Homo sapiens OX=9606 GN=IRF2BPL PE=1 SV=1	4	444635	409429	601487	205055	129101	69791.2	162591	133314	248396	645887	720561	807334	269105	454937	265198	224188	183509	240997	641660	283107	300894	333084	262459	488611	465136	543885	542662	263286	407023	233678	13.7	49.5	32	8.72	30.8	1.89	0.154	1.67	0.0983	2.39	0.00172	Yes
Q9H3K6	BolA-like protein 2 OS=Homo sapiens OX=9606 GN=BOLA2 PE=1 SV=1	2	98246.8	180171	188839	220352	137484	226600	229280	260848	279544	453582	693315	802485	238724	264019	250145	62276.1	97962	76919	483880	304851	489788	468798	499853	559043	326647	523319	539403	189616	252211	223939	22.7	24.7	9	25.6	14.1	5.39	0.00134	6.44	0.00181	5.86	0.00131
Q9H694	Protein bicaudal C homolog 1 OS=Homo sapiens OX=9606 GN=BICC1 PE=1 SV=2	7	1.34157e+06	1.16733e+06	1.00843e+06	543689	294612	454242	397317	631500	654181	1.53289e+06	1.79296e+06	2.4094e+06	1.36794e+06	949990	934148	744328	523206	576701	1.20052e+06	1.21726e+06	996700	1.46802e+06	1.21579e+06	1.26323e+06	1.1603e+06	1.35334e+06	1.61952e+06	1.0883e+06	851921	928863	18.8	10.8	10.2	16.7	12.6	1.85	0.0117	2.14	0.00694	2.24	0.00487
Q9H7C9	Mth938 domain-containing protein OS=Homo sapiens OX=9606 GN=AAMDC PE=1 SV=1	4	1.52559e+06	1.93519e+06	1.94074e+06	2.04675e+06	2048620	1.64275e+06	1.6758e+06	1.80739e+06	1.9206e+06	3.86281e+06	4.11192e+06	4.75706e+06	2.18151e+06	2.36671e+06	2.17818e+06	769213	867370	777597	4.42864e+06	4.45519e+06	3.51668e+06	3.41136e+06	3.69955e+06	4.16171e+06	2.7818e+06	3.10371e+06	3.28518e+06	1.73276e+06	2.11744e+06	1.91929e+06	6.76	12.9	10.1	8.34	10	5.14	0.00039	4.67	7.15e-05	3.8	4.25e-05
Q9H7E9	UPF0488 protein C8orf33 OS=Homo sapiens OX=9606 GN=C8orf33 PE=1 SV=1	2	2.83171e+06	3.16223e+06	2.44237e+06	3754585	2.86257e+06	3.48784e+06	3.69888e+06	4.2554e+06	3620592	4.08726e+06	3.43273e+06	4.43481e+06	3.13489e+06	2.84157e+06	2.67659e+06	1.42777e+06	1.42952e+06	983229	8.16008e+06	6.23361e+06	7.47309e+06	7.53262e+06	8.17152e+06	6.96278e+06	2.94344e+06	2.66513e+06	2.98093e+06	2.51178e+06	2.54911e+06	2.37205e+06	20.1	13.4	8	6.03	3.77	5.69	0.000707	5.9	0.00199	2.24	0.0165
Q9HC10	Otoferlin OS=Homo sapiens OX=9606 GN=OTOF PE=1 SV=3	1	2.81615e+07	2.68348e+07	2.71475e+07	5.83751e+07	1.1809e+08	7.65411e+07	5.69335e+07	5.66725e+07	6.96901e+07	3.56413e+07	2.95145e+07	4.385e+07	3.68463e+07	4.60177e+07	5.78671e+07	1.41992e+07	1.20276e+07	1.08772e+07	1.26309e+08	2.56814e+08	1.63854e+08	1.15897e+08	1.08599e+08	1.33733e+08	2.56671e+07	2.22778e+07	2.94745e+07	2.92667e+07	4.1171e+07	5.09893e+07	13.6	36.8	10.8	14	26.9	14.7	0.00261	9.65	3.26e-05	2.09	0.00281
Q9HC52	Chromobox protein homolog 8 OS=Homo sapiens OX=9606 GN=CBX8 PE=1 SV=3	3	713546	452079	597478	211484	193274	124456	55643.7	58753.1	70272	902496	948806	773801	763693	346448	385563	295411	203287	240727	462768	420318	283218	143504	121986	159965	649932	716166	520123	310720	323043	351967	18.8	24.1	13.4	15.9	6.44	1.58	0.0801	-1.74	0.0179	2.55	0.003	Yes
Q9HC84	Mucin-5B OS=Homo sapiens OX=9606 GN=MUC5B PE=1 SV=3	9	609250	71236.9	139094	1.89779e+06	500055	330527	1.32551e+06	342524	293970	1.54296e+06	528620	552609	521111	955229	486047	171651	89606.6	113642	3.42284e+06	1.12585e+06	1.61323e+06	2.38218e+06	836741	989807	952083	678597	481244	492480	763266	513020	33.8	58.9	60.7	33.6	25.6	16.4	0.0044	11.2	0.00669	5.63	0.00324
Q9NQW6	Anillin OS=Homo sapiens OX=9606 GN=ANLN PE=1 SV=2	15	6.06082e+06	5.66028e+06	6.2387e+06	3.94451e+06	3.93278e+06	3.64285e+06	3.92239e+06	3.77274e+06	3.65474e+06	8.80402e+06	9.116e+06	1.0399e+07	5.83758e+06	6.35435e+06	7.09031e+06	3.00697e+06	2.60289e+06	2.53466e+06	8.58014e+06	8.8526e+06	8.17453e+06	8.30217e+06	7.27242e+06	6.81962e+06	6.42265e+06	6.89695e+06	7.01597e+06	4.64068e+06	5.78752e+06	6.33498e+06	9.4	4	10.2	4.63	15.5	3.14	0.000491	2.75	0.00022	2.5	0.000626
Q9NRA8	Eukaryotic translation initiation factor 4E transporter OS=Homo sapiens OX=9606 GN=EIF4ENIF1 PE=1 SV=2	1	0	0	0	0	42611	0	0	0	0	0	66897	66993	0	0	0	2954.14	1564.67	5181.31	24177.3	92667.4	45158.4	3187.39	2028.77	7793.31	58941.9	50494.3	45030.4	16258.5	16042.7	4310.19	56.4	65	70.3	13.6	56	16.7	0.0061	1.34	0.662	15.9	0.0111
Q9NRG9	Aladin OS=Homo sapiens OX=9606 GN=AAAS PE=1 SV=1	1	0	0	0	41820.3	68970.2	0	64216.3	0	64773.3	162196	142936	103239	103425	0	0	933.456	3741.21	1240.33	90488.5	149991	92817.4	130723	222066	124298	116805	107889	69393.5	82149.9	3935.46	13403.2	78.1	30.3	34.4	25.7	129	56.3	0.00475	80.7	0.00324	49.7	0.00521
Q9NRX4	14 kDa phosphohistidine phosphatase OS=Homo sapiens OX=9606 GN=PHPT1 PE=1 SV=1	3	178318	152670	224758	42598.4	185173	168727	79287.7	41430.7	223266	360465	494310	208365	163814	252244	218287	98731.9	69416.1	113619	107425	409317	363762	183952	92781.9	458056	259589	373109	207831	132921	237117	194404	23.9	55.5	77.6	30.2	27.8	3.12	0.131	2.61	0.233	2.98	0.009	Yes
Q9NRZ9	Lymphoid-specific helicase OS=Homo sapiens OX=9606 GN=HELLS PE=1 SV=1	7	1.13636e+06	942336	1.36773e+06	338646	650992	327385	76060.7	76522.4	143480	1.65648e+06	3.09619e+06	2.05031e+06	2.00793e+06	1.15369e+06	904338	575569	445768	550017	1.56137e+06	1.43576e+06	752946	209620	215347	456996	1.19291e+06	2.33703e+06	1.37815e+06	1.59489e+06	1.03218e+06	1.46457e+06	13.1	34.8	48	37.5	21.6	2.39	0.0571	-1.78	0.119	3.12	0.0215	Yes
Q9NUX5	Protection of telomeres protein 1 OS=Homo sapiens OX=9606 GN=POT1 PE=1 SV=1	1	1.48454e+06	1788629	2.84867e+06	2.90051e+06	2.91592e+06	1.82634e+06	2164631	2.34864e+06	1.99601e+06	2.40893e+06	3.05801e+06	3.32298e+06	2479729	2161404	2.72396e+06	748518	801678	1.14137e+06	6.27596e+06	6.34134e+06	3.90971e+06	4.40645e+06	4.5006e+06	3.83028e+06	1.73479e+06	2.30821e+06	2.23359e+06	1.96963e+06	1.93376e+06	2.4002e+06	23.8	25.1	8.55	14.9	12.4	6.14	0.0011	4.73	0.00292	2.33	0.00797
Q9NVL8	Uncharacterized protein CCDC198 OS=Homo sapiens OX=9606 GN=CCDC198 PE=1 SV=2	2	631706	696157	743431	7.15648e+06	692247	7.71516e+06	1.07239e+07	7.65331e+06	1.05682e+07	1.70198e+07	2.70313e+07	1.81955e+07	3.221e+07	2.16478e+07	2.67218e+07	324209	313411	299924	1.54848e+07	1.09946e+07	1.65161e+07	2.18302e+07	1.46658e+07	2.02801e+07	1.22568e+07	2.04035e+07	1.22304e+07	2.55841e+07	1.93678e+07	2.35457e+07	3.89	20.5	19.9	31.5	13.9	45.9	0.0008	60.6	0.000628	47.9	0.00168
Q9NVN8	Guanine nucleotide-binding protein-like 3-like protein OS=Homo sapiens OX=9606 GN=GNL3L PE=1 SV=1	3	213632	50028.6	431090	227169	206807	107918	133833	138793	215877	608238	729231	755170	432020	372057	340578	109018	55441.9	66723.1	491537	456955	275428	300107	271260	418135	438023	550429	507599	343151	332871	300099	36.7	28.5	23.6	11.4	6.91	5.29	0.00362	4.28	0.0058	6.47	0.00638
Q9NWH9	SAFB-like transcription modulator OS=Homo sapiens OX=9606 GN=SLTM PE=1 SV=2	11	2.46478e+06	2.60214e+06	2.48782e+06	836774	958598	711844	608637	861724	1.0501e+06	3.12134e+06	3.30609e+06	3.67775e+06	2.0023e+06	1.93457e+06	2.18667e+06	1.24276e+06	1.25034e+06	1.04037e+06	1.86877e+06	2.10604e+06	1.69647e+06	1.50522e+06	1.6548e+06	2.0534e+06	2.24784e+06	2.59963e+06	2.47206e+06	1.72946e+06	1.73082e+06	2.034e+06	10.1	10.9	16.3	7.3	9.58	1.61	0.00556	1.48	0.0318	2.07	0.000977	Yes
Q9NXL2	Rho guanine nucleotide exchange factor 38 OS=Homo sapiens OX=9606 GN=ARHGEF38 PE=2 SV=2	1	546076	291094	453286	836437	478258	516565	698234	511240	692485	705646	521175	713382	524052	531928	573580	275336	130471	181618	1.80984e+06	1.04008e+06	1.10583e+06	1.42137e+06	979670	1.32886e+06	508171	393387	479510	416251	475904	505407	37.5	32.4	18.7	13	9.75	6.73	0.00268	6.35	0.00434	2.35	0.041
Q9NYU2	UDP-glucose:glycoprotein glucosyltransferase 1 OS=Homo sapiens OX=9606 GN=UGGT1 PE=1 SV=3	1	0	0	0	0	0	0	0	0	0	0	146181	91926.4	0	0	0	3351.82	3620.26	1268.57	36196.7	18831.2	18890.4	16553.4	21093.4	9641.1	68940.2	110339	61789.8	4766.84	2841.14	12976.1	46.9	40.6	36.6	32.6	78.4	8.97	0.00794	5.74	0.0154	29.3	0.00276
Q9NZR1	Tropomodulin-2 OS=Homo sapiens OX=9606 GN=TMOD2 PE=1 SV=1	1	0	32814.2	42200.5	95159.8	126328	41049.8	147269	177432	114342	48299.2	40669.6	37980.2	111350	30870.4	75641.5	7997.87	14707.6	16908.4	205901	274730	87876.4	299790	340007	219419	34782.7	30697.7	25529	88444.5	27619.1	66651.2	35.2	49.9	21.4	15.3	50.6	14.4	0.00496	21.7	0.00102	2.3	0.0483
Q9P2K5	Myelin expression factor 2 OS=Homo sapiens OX=9606 GN=MYEF2 PE=1 SV=3	6	229600	141561	181976	150029	211774	168523	165880	136056	284257	851234	1.12435e+06	1.09895e+06	502239	447371	416365	104159	68824.4	114548	444599	467324	521472	368241	382978	510192	613016	848670	738676	404308	405871	379372	25	8.27	18.6	16.1	3.75	4.99	0.00556	4.39	0.00243	7.65	0.000991
Q9P2N6	KAT8 regulatory NSL complex subunit 3 OS=Homo sapiens OX=9606 GN=KANSL3 PE=1 SV=2	2	49239.5	24480	0	0	0	0	0	0	28619.6	81198.3	53410.5	69077.3	0	46614.7	9469.72	24826.9	13977.5	16565.3	7117.98	11745.1	33264.4	17606.8	21779.6	65205.6	58475	67248.4	46431.4	21723.7	41705.2	10129.2	30.7	80.3	75.6	18.2	65.1	-1.06	0.658	1.89	0.355	3.11	0.0076	Yes
Q9P2P6	StAR-related lipid transfer protein 9 OS=Homo sapiens OX=9606 GN=STARD9 PE=1 SV=3	2	438750	241104	185965	76854.1	79660.7	80565.8	32547.8	87496.1	86480.3	335028	242110	500874	256759	252409	232325	76913.5	122664	81515	166293	173241	172470	169049	167666	165953	241270	182746	336670	203942	225824	204712	26.9	2.23	0.926	30.6	5.87	1.82	0.0505	1.79	0.0542	2.71	0.0136	Yes
Q9UBI1	COMM domain-containing protein 3 OS=Homo sapiens OX=9606 GN=COMMD3 PE=1 SV=1	1	19126.7	41684.4	36233.3	17794.6	25433.2	27076.2	0	10585.3	24918.9	0	39884.5	52108.7	20681.8	37196.3	12517.7	9643.83	18683.3	14517.6	38502.9	55310.4	57962.8	41586.3	20284.2	47818.4	26901.1	30105.1	35025.7	16427.4	33278.7	11029.9	31.7	20.9	39.5	13.3	57.3	3.54	0.00765	2.56	0.0553	2.15	0.0398
Q9UBQ5	Eukaryotic translation initiation factor 3 subunit K OS=Homo sapiens OX=9606 GN=EIF3K PE=1 SV=1	1	19136.3	20073.9	59332.3	61010.1	70466	0	47831.6	129710	126934	173025	218997	184733	0	81365.8	74843.2	9648.66	8997.29	23772.6	132010	153244	152751	97368.9	248559	243581	124604	165301	124171	81149.6	72796.2	65947.7	59	8.3	43.7	17.1	10.4	10.3	0.0143	13.9	0.00381	9.76	0.0115
Q9UBW7	Zinc finger MYM-type protein 2 OS=Homo sapiens OX=9606 GN=ZMYM2 PE=1 SV=1	3	208451	208661	252980	72019.1	122503	34082.1	48401.6	97618.7	72697.5	512322	438605	393025	198136	218026	199147	108314	97936.6	193804	188620	274289	232051	289874	218302	144204	368949	497972	421433	246086	197845	186034	39.5	18.5	33.5	15.1	15.2	1.74	0.0913	1.63	0.166	3.22	0.0182	Yes
Q9UDW1	Cytochrome b-c1 complex subunit 9 OS=Homo sapiens OX=9606 GN=UQCR10 PE=1 SV=3	2	126104	187022	91276	176874	104876	0	181461	338455	0	122745	209420	323320	222394	154978	186425	64447.7	84704.6	50475.5	382709	261187	281142	403110	648568	346863	160441	158072	217324	176646	138656	164267	25.9	21.1	34.4	18.8	12.1	4.63	0.00158	7.01	0.00161	2.68	0.00747
Q9UGU0	Transcription factor 20 OS=Homo sapiens OX=9606 GN=TCF20 PE=1 SV=3	4	199688	314073	481782	848720	394532	301247	315674	496391	183482	756160	713942	719721	394225	433245	97680.3	152544	168125	193035	2.07005e+06	858000	644889	654986	984506	836662	544549	538889	483772	313130	387615	482937	11.9	64.5	20	6.43	21.6	6.96	0.0315	4.82	0.00106	3.05	0.000595
Q9UJV9	Probable ATP-dependent RNA helicase DDX41 OS=Homo sapiens OX=9606 GN=DDX41 PE=1 SV=2	7	681387	871188	1.09923e+06	222889	270832	143101	212464	143959	91580.2	967517	1208661	1.31427e+06	697852	774547	731889	351241	408238	453585	486361	593008	661797	462646	430759	248380	696758	912306	883409	591574	692971	644900	12.7	15.2	30.4	14.1	7.89	1.44	0.039	-1.06	0.699	2.05	0.00331	Yes
Q9UKA9	Polypyrimidine tract-binding protein 2 OS=Homo sapiens OX=9606 GN=PTBP2 PE=1 SV=1	2	1.51881e+06	3.10847e+06	2.38324e+06	1.29472e+06	1.22716e+06	1.3875e+06	2.29539e+06	1.91423e+06	1.48124e+06	2.54639e+06	3.83995e+06	3263975	2.23232e+06	1.99277e+06	2594091	765798	1.39324e+06	954891	2.80144e+06	2.66875e+06	2.97025e+06	4.67264e+06	3.66817e+06	2.84246e+06	1.83378e+06	2.89842e+06	2.19393e+06	1.77312e+06	1.78289e+06	2.28577e+06	31	5.37	24.6	23.5	15.1	2.71	0.0248	3.59	0.00523	2.22	0.0235
Q9UKM9	RNA-binding protein Raly OS=Homo sapiens OX=9606 GN=RALY PE=1 SV=1	12	4.04614e+06	4.18468e+06	6.43468e+06	3.63999e+06	3.48547e+06	2.86343e+06	3.24008e+06	3.20834e+06	3.43466e+06	6.04751e+06	6.93241e+06	7.9318e+06	4870750	4.35596e+06	4.43808e+06	2.07173e+06	1.94921e+06	2.79296e+06	7.56229e+06	7.63035e+06	6.87512e+06	6.60363e+06	6.22805e+06	6.61559e+06	4.35511e+06	5.23263e+06	5.33148e+06	4.13223e+06	3.84765e+06	3.91369e+06	20.1	5.68	3.4	10.8	3.76	3.24	0.00526	2.85	0.0091	2.19	0.00702
Q9ULL5	Proline-rich protein 12 OS=Homo sapiens OX=9606 GN=PRR12 PE=1 SV=3	3	95081.6	150683	58828.1	34629.2	57950.7	44862.7	34197.6	138506	86853.1	206876	192105	318165	169827	91270	114771	49533.9	85101	84521.5	98912	135213	124443	152285	265414	173558	148982	149790	220650	152827	149148	119519	27.9	15.6	30.5	23.8	13	1.64	0.0842	2.7	0.0157	2.37	0.02
Q9ULX3	RNA-binding protein NOB1 OS=Homo sapiens OX=9606 GN=NOB1 PE=1 SV=1	2	140142	167630	137317	185288	249452	173167	204481	268980	283665	594053	686701	828275	328560	205022	286913	70660.9	75133.2	55018.5	400916	542490	370703	416253	515437	544344	427807	518327	556738	260972	183429	252812	15.8	20.9	13.7	13.2	18.3	6.54	0.000295	7.35	0.000107	7.48	0.000105
Q9UPN9	E3 ubiquitin-protein ligase TRIM33 OS=Homo sapiens OX=9606 GN=TRIM33 PE=1 SV=3	7	847140	1.27162e+06	1.39724e+06	792741	1.08571e+06	807649	783077	1.18182e+06	1.16241e+06	2.12939e+06	1.84094e+06	2.24356e+06	1.75937e+06	1.3302e+06	1.17369e+06	427828	592172	563909	1.75562e+06	2.39957e+06	1.7741e+06	1.73172e+06	2.30999e+06	2.24271e+06	1.55225e+06	1.40401e+06	1.42801e+06	1.39962e+06	1.19481e+06	1.04178e+06	16.6	18.5	15.1	5.44	14.8	3.74	0.000789	3.97	0.000566	2.77	0.0058
Q9UQ88	Cyclin-dependent kinase 11A OS=Homo sapiens OX=9606 GN=CDK11A PE=1 SV=4	4	843055	844904	701065	126944	106974	73293.8	188604	165054	216131	885974	1.15124e+06	1.17442e+06	404282	589422	554366	425075	378693	280895	322686	272447	392873	389866	318504	417063	638034	868962	789404	486740	527343	488477	20.4	18.4	13.6	15.3	4.58	-1.1	0.611	1.04	0.777	2.12	0.00971	Yes
Q9Y2R4	Probable ATP-dependent RNA helicase DDX52 OS=Homo sapiens OX=9606 GN=DDX52 PE=1 SV=3	5	549404	481420	494463	249934	255561	271192	248429	382870	315537	577999	554533	816391	487599	314669	411042	287761	220143	199600	580308	579026	660375	519017	801937	634008	438342	444208	548750	394840	359018	365077	19.6	7.68	21.8	13	5.14	2.57	0.00634	2.76	0.00394	2.02	0.00831
Q9Y2T2	AP-3 complex subunit mu-1 OS=Homo sapiens OX=9606 GN=AP3M1 PE=1 SV=1	3	0	46386.6	94490.9	50564.8	0	41674.2	158950	85330.3	121884	249803	197123	246134	123063	31876.7	140365	29134.5	25456.9	45578.6	118042	52093.6	96621	323568	167133	236471	179895	148790	165442	97748.1	121133	123682	32.1	37.8	32.3	9.45	12.5	2.66	0.0393	7.26	0.00163	4.93	0.00712
Q9Y3A5	Ribosome maturation protein SBDS OS=Homo sapiens OX=9606 GN=SBDS PE=1 SV=4	5	758923	1.09451e+06	1.05863e+06	723424	686102	468874	954650	808762	731480	2.93653e+06	2.84084e+06	3.11658e+06	1.65425e+06	1.21329e+06	1.28838e+06	398246	514722	451940	1.57147e+06	1.51586e+06	1.33989e+06	1.19007e+06	1.55752e+06	1.40785e+06	2.11475e+06	2.14429e+06	2.09486e+06	1.31396e+06	1.08551e+06	1.2822e+06	12.8	8.19	13.3	1.17	10.1	3.24	0.00044	3.04	0.000508	4.66	0.00214
Q9Y3E0	Vesicle transport protein GOT1B OS=Homo sapiens OX=9606 GN=GOLT1B PE=1 SV=1	4	113727	382053	303672	335061	510851	113503	284787	427513	371381	472723	552685	374920	259747	305247	311305	132089	171240	149390	792255	1.14816e+06	1.08547e+06	585320	819227	717790	340432	457549	274618	212822	311789	291128	13	18.8	16.6	25.9	19.2	6.68	0.000403	4.69	0.000342	2.37	0.015
Q9Y3E5	Peptidyl-tRNA hydrolase 2, mitochondrial OS=Homo sapiens OX=9606 GN=PTRH2 PE=1 SV=1	2	135197	121544	124347	57345.5	51630.1	110937	70342.1	94392.1	124900	270101	210441	204549	164945	117024	87658	72945.3	66744.9	49822.1	126180	122515	237485	147839	202621	239679	194514	158843	137491	131015	128044	77239.4	18.9	40.3	23.5	17.6	27	2.57	0.0332	3.11	0.00397	2.59	0.00357
Q9Y3P9	Rab GTPase-activating protein 1 OS=Homo sapiens OX=9606 GN=RABGAP1 PE=1 SV=3	2	304385	244586	319507	209591	209609	110681	150045	137755	235043	590713	484559	700611	235593	222434	271176	156035	111591	130925	453502	455842	282992	308392	283486	453968	425402	365749	470927	187129	243771	238945	16.8	24.9	26.4	12.5	14.1	2.99	0.00755	2.62	0.00804	3.17	0.000948
Q9Y4C2	TRPM8 channel-associated factor 1 OS=Homo sapiens OX=9606 GN=TCAF1 PE=1 SV=3	5	130648	321193	261576	56006.2	100297	120770	22694.1	125123	115605	759674	581928	894054	290424	499909	311581	77762.9	148674	120944	354705	260564	301760	210098	269147	268779	547079	439243	627442	250324	447258	274548	30.9	15.4	13.6	17.6	33.1	2.64	0.0204	2.15	0.0375	4.65	0.00508
Q9Y618	Nuclear receptor corepressor 2 OS=Homo sapiens OX=9606 GN=NCOR2 PE=1 SV=3	68	1.6297e+07	1.86006e+07	2.04391e+07	2.24268e+07	2.47475e+07	2.28771e+07	2.09181e+07	2.07658e+07	2.43473e+07	3.9016e+07	4.27341e+07	4.42367e+07	2.6911e+07	2.47276e+07	2.63303e+07	8.29617e+06	8.50527e+06	8.57162e+06	4.91462e+07	5.33934e+07	4.90502e+07	4.31438e+07	4.19829e+07	4.69456e+07	2.81788e+07	3.19816e+07	2.97763e+07	2.14151e+07	2.2345e+07	2.31452e+07	1.7	4.91	5.9	6.37	3.88	5.97	5.29e-05	5.21	0.000155	3.54	0.000401
Q9Y6K5	2'-5'-oligoadenylate synthase 3 OS=Homo sapiens OX=9606 GN=OAS3 PE=1 SV=3	13	1.21024e+06	1.85478e+06	3.13462e+06	1.63944e+06	1.77334e+06	1.5512e+06	1.78697e+06	1.99896e+06	1.77905e+06	3.14242e+06	3.50371e+06	3.70145e+06	2.35915e+06	2.22941e+06	1.99486e+06	616869	855934	1.36196e+06	3.56757e+06	3.89263e+06	3.81344e+06	3.99632e+06	4.09098e+06	4.04423e+06	2.26807e+06	2.60098e+06	2.78064e+06	1.87932e+06	2.01196e+06	1.87964e+06	40.3	4.51	1.17	10.2	3.98	3.98	0.0235	4.28	0.0224	2.7	0.0381
Q9Y6M1	Insulin-like growth factor 2 mRNA-binding protein 2 OS=Homo sapiens OX=9606 GN=IGF2BP2 PE=1 SV=2	7	2.44342e+06	2.96921e+06	3.22656e+06	1.09958e+06	1.3282e+06	1.07019e+06	1.27799e+06	1.07726e+06	1.30343e+06	3.59413e+06	3.98478e+06	4.03031e+06	2.34864e+06	2.14036e+06	1.95856e+06	1.23199e+06	1.33082e+06	1.36902e+06	2.39276e+06	2.88848e+06	2.44362e+06	2.73924e+06	2.35732e+06	2.50896e+06	2.59891e+06	3.00975e+06	2.70904e+06	1.86551e+06	1.93933e+06	1.94083e+06	5.4	10.6	7.59	7.67	2.25	1.96	0.00203	1.93	0.00043	2.12	0.000277	Yes
Q9Y6Q9	Nuclear receptor coactivator 3 OS=Homo sapiens OX=9606 GN=NCOA3 PE=1 SV=1	6	362648	436070	540127	189972	113884	137961	99899.9	111463	74939.5	602517	581244	469915	243051	328674	352530	190665	206119	226431	417941	271967	396779	250398	310006	151911	518614	438728	541722	216408	203422	340949	8.63	21.8	33.6	10.8	29.9	1.74	0.0441	1.14	0.704	2.41	0.000577	Yes
TurboID	miniTurbo or TurboID	6	611097	803187	516708	856044	864795	760057	717892	931990	1.02738e+06	854870	900795	660984	1.64835e+06	658025	900318	220238	365553	230944	1.70143e+06	1.8873e+06	1.62921e+06	1.50064e+06	1.79233e+06	1.97151e+06	637969	687521	474498	1.32125e+06	591859	816421	29.7	7.66	13.5	18.6	41.1	6.39	0.00474	6.45	0.00209	2.2	0.0188
